# Supplementary material
Source: PubMed Central journal article supplement (PMC6125976)
Supplement: JCB702156_supplementary_material.pdf [file JCB702156_supplementary_material.pdf]

**Supplementary table 1. List of symbols and abbreviations used in the tables 2-5.**

| Instructions                                                                                                                                                                                                                                                                                                                                                                                                                                                                                                                                                                                                                                                                                                                                                                                                                                                                                                                                                                                                                                                                                                                                                                                                                                                                                                                                                                                                                                                                                                                                                                                                                                                                                                                                                                                                                                                                                                                                                                                                                                                                          | Symbols and information in sub- and superscript                                                                                                                                                                                                        |                                                                                                                                                                                                                                                                                                                                                                                                                                                                                                                                                                                                                                                                                                                                                                        | Abbreviations                                                                                                                                                                                                                                                      |                                                                                                                                                                                                                                                                                                                                                                                                                                                                                |
|---------------------------------------------------------------------------------------------------------------------------------------------------------------------------------------------------------------------------------------------------------------------------------------------------------------------------------------------------------------------------------------------------------------------------------------------------------------------------------------------------------------------------------------------------------------------------------------------------------------------------------------------------------------------------------------------------------------------------------------------------------------------------------------------------------------------------------------------------------------------------------------------------------------------------------------------------------------------------------------------------------------------------------------------------------------------------------------------------------------------------------------------------------------------------------------------------------------------------------------------------------------------------------------------------------------------------------------------------------------------------------------------------------------------------------------------------------------------------------------------------------------------------------------------------------------------------------------------------------------------------------------------------------------------------------------------------------------------------------------------------------------------------------------------------------------------------------------------------------------------------------------------------------------------------------------------------------------------------------------------------------------------------------------------------------------------------------------|--------------------------------------------------------------------------------------------------------------------------------------------------------------------------------------------------------------------------------------------------------|------------------------------------------------------------------------------------------------------------------------------------------------------------------------------------------------------------------------------------------------------------------------------------------------------------------------------------------------------------------------------------------------------------------------------------------------------------------------------------------------------------------------------------------------------------------------------------------------------------------------------------------------------------------------------------------------------------------------------------------------------------------------|--------------------------------------------------------------------------------------------------------------------------------------------------------------------------------------------------------------------------------------------------------------------|--------------------------------------------------------------------------------------------------------------------------------------------------------------------------------------------------------------------------------------------------------------------------------------------------------------------------------------------------------------------------------------------------------------------------------------------------------------------------------|
| <p>- Several modifying factors are supplemented with additional information regarding correlations, dynamics, and other information found in the literature, which is indicated with a capital in superscript (<math>x^{A-Z}</math>). Additional information is listed following the relevant table.</p> <p>- For modifiers categorised in B and C, all reported changes are included; for category A only the consistent changes are included.</p> <p>- Both absolute and relative values for the effects of each modifying factor on global, grey matter, white matter and regional perfusion are included in the tables, provided that they were reported in the literature. In the case of absence of numerical information, a symbol (<math>\uparrow/\downarrow/\updownarrow/=</math>) is used to indicate the observed effects on cerebral perfusion or the information provided by studies conducted with macrovascular approaches (e.g. Transcranial Doppler Ultrasound), generally limited to the effects on the middle cerebral artery (MCA).</p> <p>- All absolute values mentioned in the tables are expressed in ml/100g/min, except if stated otherwise. Relative values are expressed in percentage (%). For global effects of each modifier, the average and range (if applicable) of all values found in the literature are mentioned. For regional effects, only the range is specified.</p> <p>- Extra information regarding the values of perfusion changes are indicated in subscript (<math>x_{DA}, x_{PS} \dots</math>).</p> <p>- When a cell is struck through, the effects of the modifier on perfusion have not yet been investigated. This is not synonym of absence of effects, which is indicated with an equal sign (=).</p> <p>- In the column, all affected regions reported in literature are included. All regions are bilaterally influenced, except if mentioned otherwise—i.e., left (L) or right (R). Regions for which both an increase and decrease in perfusion have been reported for the same modifying factor, are <u>underlined</u>.</p> | <p><math>\uparrow</math></p> <p><math>\downarrow</math></p> <p><math>\updownarrow</math></p> <p>=</p> <p>N</p> <p>NS</p> <p>(l)</p> <p><math>x^{A-Z}</math></p> <p>*</p> <p><math>x \neq</math></p> <p><math>x/\Delta y</math></p> <p>FL</p> <p>HA</p> | <p>Increased perfusion effect</p> <p>Decreased perfusion effect</p> <p>Both increased and decreased perfusion effects</p> <p>No effect on perfusion</p> <p>Normalized in comparison with perfusion in control subjects</p> <p>Not significant effect</p> <p>Not applicable or not yet investigated</p> <p>Strong inter-subject differing results (<math>\uparrow/\downarrow/=</math>) even within one study</p> <p>Extra information can be found in the table footnote</p> <p>Only investigated with macrovascular approaches (e.g. TCD, angiography, ...)</p> <p>Occasionally, distinct results have been found.</p> <p>Perfusion change per change of parameter y (e.g., mmHg,...)</p> <p>Effect on perfusion during a flickering light</p> <p>At high altitude</p> | <p>L</p> <p>R</p> <p>cort.</p> <p>gyr.</p> <p>inf.</p> <p>sup.</p> <p>lat.</p> <p>med.</p> <p>ant.</p> <p>post.</p> <p>nucl.</p> <p>WM</p> <p>GM</p> <p>PF</p> <p>F</p> <p>T</p> <p>P</p> <p>O</p> <p>MCA</p> <p>BA</p> <p>DBP</p> <p>SBP</p> <p>NRT</p> <p>LT</p> | <p>Left</p> <p>Right</p> <p>Cortex/cortices</p> <p>Gyrus/gyri</p> <p>Inferior</p> <p>Superior</p> <p>Lateral</p> <p>Medial</p> <p>Anterior</p> <p>Posterior</p> <p>Nucleus</p> <p>White Matter</p> <p>Grey Matter</p> <p>Prefrontal</p> <p>Frontal</p> <p>Temporal</p> <p>Parietal</p> <p>Occipital</p> <p>Middle Cerebral Artery</p> <p>Brodmann Area</p> <p>Diastolic Blood Pressure</p> <p>Systolic Blood Pressure</p> <p>Nicotine Replacement Therapy</p> <p>Long Term</p> |
| <b>Categories</b>                                                                                                                                                                                                                                                                                                                                                                                                                                                                                                                                                                                                                                                                                                                                                                                                                                                                                                                                                                                                                                                                                                                                                                                                                                                                                                                                                                                                                                                                                                                                                                                                                                                                                                                                                                                                                                                                                                                                                                                                                                                                     |                                                                                                                                                                                                                                                        |                                                                                                                                                                                                                                                                                                                                                                                                                                                                                                                                                                                                                                                                                                                                                                        |                                                                                                                                                                                                                                                                    |                                                                                                                                                                                                                                                                                                                                                                                                                                                                                |
| <p><u>Prevalence and consistency label</u></p> <p>- A – high prevalence, consistent across studies</p> <p>- B – high prevalence, inconsistent across studies</p> <p>- C – low prevalence</p> <p><u>Importance label</u></p> <p>- 1 – large effects (&gt;24%; &gt;15ml/100g/min)</p> <p>- 2 – intermediate effects (between 14-24%; 6-15 ml/100g/min)</p> <p>- 3 – small effects (&lt;14%; &lt;6ml/100g/min)</p> <p>- 4 – unknown</p>                                                                                                                                                                                                                                                                                                                                                                                                                                                                                                                                                                                                                                                                                                                                                                                                                                                                                                                                                                                                                                                                                                                                                                                                                                                                                                                                                                                                                                                                                                                                                                                                                                                  |                                                                                                                                                                                                                                                        |                                                                                                                                                                                                                                                                                                                                                                                                                                                                                                                                                                                                                                                                                                                                                                        |                                                                                                                                                                                                                                                                    |                                                                                                                                                                                                                                                                                                                                                                                                                                                                                |

Supplementary table 2. Physiology, lifestyle and health group of perfusion-modifying factors sorted according to the relevance of the effect in the field of neuroimaging. Absolute values correspond to ml/100g/min, except if stated otherwise; relative values correspond to a percentage (%).

| Factor                               | Cat. | Subcategory                 | Global effect                                                                                                                             |                                                                                                                                           | Regional effect          |                          | Ref                                                                                                                                                                                                                                                                                                                                                                                                                                                                                                                                                                                                                                                                                                                                                                                     |                              |
|--------------------------------------|------|-----------------------------|-------------------------------------------------------------------------------------------------------------------------------------------|-------------------------------------------------------------------------------------------------------------------------------------------|--------------------------|--------------------------|-----------------------------------------------------------------------------------------------------------------------------------------------------------------------------------------------------------------------------------------------------------------------------------------------------------------------------------------------------------------------------------------------------------------------------------------------------------------------------------------------------------------------------------------------------------------------------------------------------------------------------------------------------------------------------------------------------------------------------------------------------------------------------------------|------------------------------|
|                                      |      |                             | Absolute (ml/100g/min)                                                                                                                    | Relative (%)                                                                                                                              | Absolute (ml/100g/min)   | Relative (%)             |                                                                                                                                                                                                                                                                                                                                                                                                                                                                                                                                                                                                                                                                                                                                                                                         | Regions                      |
| Age <sup>A</sup>                     | A1   | Adult <sup>z</sup>          | - 0.27 /year (G)<br>(- 0.16 → - 0.38)<br>- 0.31 /year (GM)<br>(- 0.11 → - 0.62)<br>= /year (WM)<br>- 0.22 /year (WM)<br>(- 0.19 → - 0.24) | - 0.53 /year (G)<br>(- 0.37 → - 0.66)<br>- 0.49 /year (GM)<br>(- 0.16 → - 0.77)<br>= /year (WM)<br>- 0.45 /year (WM)<br>(- 0.30 → - 0.58) | - 0.62 → + 0.20<br>/year | - 1.04 → + 0.43<br>/year | ↑ Sup. T gyr., intermediate T gyr., putamen.<br>↓ F cort., F pole, medial F., L ant. and post. F., lateral F., superoF gyr., mid. F gyr., inf. F gyr., F-T, preF cort., motor area, premotor area, somatosensory cort., anterior speech area, P cort., P-O, sup. P, inf. P lobule, T cort., L post. T, sup. T gyr., mid. T gyr., inf. T gyr., T-Sylvian, posterior speech area, O cort., visual cort., basal ganglia, thalamus, F WM, P WM, T WM, O WM, internal capsule, cingulate gyr., ant. cingulate cort., post. cingulate cort., parahippocampal gyr., insular cort., hippocampus, cuneus, cerebellum, lateral ventricular reg., striatum, angular gyr., subcallosal gyr., precuneus, amygdala, hypothalamus, pericalcarine gyr., supramarginal gyr., pallidum, putamen, caudate. | 1-48                         |
|                                      | A1   | Child <sup>z</sup>          | - 1.69 /year (GM)<br>(- 1.05 → -2.00)<br>- 0.30 /year (WM)<br>(- 0.14 → - 0.44)                                                           | -1.92 /year (GM)<br>(- 1.20 → - 2.06)<br>- 1.19/year (WM)<br>(- 0.58 → - 1.71)                                                            | - 0.16 → - 1.92 /year    | - 0.67 → - 2.22 /year    | ↓ F cort., F pole, F WM, ventromed. preF cort., dorsolat. preF cort., T cort., T WM, lat. T cort., P cort., P WM, inf. P lobule, O cort., O WM, cingulate cort., basal ganglia, thalamus, subcortical reg. post. cingulate cort., cerebellum.                                                                                                                                                                                                                                                                                                                                                                                                                                                                                                                                           | 44, 47-56                    |
| Occupation / Retirement <sup>B</sup> | C2   | Retired (inactivity)        | -1.50 /year (GM)                                                                                                                          | -2.18 /year (GM)                                                                                                                          |                          |                          |                                                                                                                                                                                                                                                                                                                                                                                                                                                                                                                                                                                                                                                                                                                                                                                         | 57                           |
| Social environment                   | C3   | Home/eventide home/hospital | = (G)                                                                                                                                     | = (G)                                                                                                                                     |                          |                          |                                                                                                                                                                                                                                                                                                                                                                                                                                                                                                                                                                                                                                                                                                                                                                                         | 58                           |
| Gender <sup>C</sup>                  | B1   | Female <sup>z</sup>         | + 7.26 (G)<br>(3.80 → 10.73)<br>+ 8.56 (GM)<br>(5.70 → 12.1)<br>+ 8.73 (WM)<br>= (G/GM/WM)                                                | + 12.1 (G)<br>(11.0 → 21.9)<br>+ 8.56 (GM)<br>(11.7 → 22.2)<br>+ 8.73 (WM)<br>= (G/GM/WM)                                                 | + 1.14 → + 16.1          | + 2.28 → + 23.2          | ↑ F cort., caudal mid. F cort., pars opercularis, pars triangularis, rostral mid. F, superior F, F pole, precentral gyr., postcentral gyr., P cort., sup. P cort., inf. P lobule, precuneus, supramarginal gyr., T cort., sup. T gyr., R inf. T lobe, entorhinal cort., O cort., visual cort., pericalcarine gyr., insula, mid-cingulate, caudal ant. cingulate cort., post. cingulate cort., caudate, pallidum, thalamus, corpus callosum.                                                                                                                                                                                                                                                                                                                                             | 24-41, 43, 44, 47, 49, 59-63 |
| Menstrual cycle                      | C3   |                             | = (GM)<br>↓* (MCA)                                                                                                                        | = (GM)<br>↓* (MCA)                                                                                                                        |                          |                          |                                                                                                                                                                                                                                                                                                                                                                                                                                                                                                                                                                                                                                                                                                                                                                                         | 64-66                        |
| Pregnancy                            | C4   | Pregnancy                   | - 0.59 cm/s* /week (MCA)<br>(- 0.41 → - 0.77)                                                                                             | - 0.58* /week (MCA)<br>(- 0.57 → - 0.58)                                                                                                  |                          |                          |                                                                                                                                                                                                                                                                                                                                                                                                                                                                                                                                                                                                                                                                                                                                                                                         | 67-69                        |
| Menopause <sup>D</sup>               | C4   |                             | ↓* (MCA)                                                                                                                                  | ↓* (MCA)                                                                                                                                  | ↓                        | ↓                        | ↓ Pref reg., lower and central part of pref reg., lower part of F reg., upper and lower part of T reg., lower part of P reg., P-O reg., upper part O reg., hippocampus, pons, cerebellum, basal nuclei, thalamus.                                                                                                                                                                                                                                                                                                                                                                                                                                                                                                                                                                       | 70, 71                       |
| Diurnal Rhythm <sup>E</sup>          | C4   | Later on day                | ↑* (MCA)                                                                                                                                  | ↑* (MCA)                                                                                                                                  | ↓                        | ↓                        | ↓ Default mode network reg.: post cingulate cort., inf. P lobules (incl. angular gyr., middle T gyr.), medial. PF cort. (incl. med. and middle F gyr. and ant. cingulate cort.)                                                                                                                                                                                                                                                                                                                                                                                                                                                                                                                                                                                                         | 72-74                        |
| Body Mass Index                      | C3   | BMI                         | = (GM)<br>↓* (MCA)                                                                                                                        | = (GM)<br>↓* (MCA)                                                                                                                        |                          |                          |                                                                                                                                                                                                                                                                                                                                                                                                                                                                                                                                                                                                                                                                                                                                                                                         | 63, 75, 76                   |
|                                      | C4   | Fat free mass               |                                                                                                                                           |                                                                                                                                           | ↑                        | ↑                        | ↑ R inf. T gyr. (BA37), R temporal lobe (subgyr.) (BA37), R mid. O gyr. (BA19), lingual gyr. (BA18/19), L cuneus (BA18), parahippocampal gyr. (BA30/35), cerebellum (culmen), R thalamus, midbrain, L ant. cingulate cort. (BA32), R post. cingulate cort. (BA30).                                                                                                                                                                                                                                                                                                                                                                                                                                                                                                                      | 77                           |
|                                      | C4   | Overweight                  | ↓                                                                                                                                         | ↓                                                                                                                                         | ↓                        | ↓                        | ↓ Pref cort. (BA8/9/10/11/44), L sup. orbitof cort., R mid. orbitof cort., R precentral gyr., R postcentral gyr., ant. cingulate cort. (BA32).                                                                                                                                                                                                                                                                                                                                                                                                                                                                                                                                                                                                                                          | 78                           |

|                                                             |    |                                                   |                                                                |                                                                |                 |                  |                                                                                                                                                                                                                                                                                                                                                          |                                 |
|-------------------------------------------------------------|----|---------------------------------------------------|----------------------------------------------------------------|----------------------------------------------------------------|-----------------|------------------|----------------------------------------------------------------------------------------------------------------------------------------------------------------------------------------------------------------------------------------------------------------------------------------------------------------------------------------------------------|---------------------------------|
| Physical exercise <sup>F</sup>                              | A1 | During <sup>z</sup>                               | + 10.5 (G)<br>(11.4 → 14.7)<br>+ 15.4 (GM)<br>(10.5 → 20.3)    | + 22.1 (G)<br>(24.7 → 28.0)<br>+ 21.8 (GM)<br>(16.3 → 27.3)    | + 4.00 → + 40.3 | + 10.34 → + 70.5 | ↑ F reg., precentral gyr., postcentral gyr., supplementary motor area, P, T, O, insular cort., cerebellar vermis, cerebellum (hemisphere).                                                                                                                                                                                                               | 79-111                          |
|                                                             | B1 | After                                             | = (G/GM/WM)<br>↑ (G)<br>+ 6.00 (WM)<br>(10.5 → 20.3)           | = (G/GM/WM)<br>↑ (G)<br>+ 33.4 (WM)<br>(10.5 → 20.3)           | - 8.99 → +      | - 19.4 → +       | ↑ L insula, motor area of the leg.<br>↓ Sensorimotor cort. (leg) (BA1-4), ant. cingulate cort. (BA24/32), R inf. thalamus, L inf. thalamus, inf. ant. insula, R inf. post. insula, L sup. ant. insula, hippocampus.                                                                                                                                      | 101-107, 109, 110, 112-117      |
| Physical training <sup>G</sup>                              | B1 | Training<br>(weeks/months)                        | = (G)<br>+ 2.20 (GM)<br>- 16.4 cm/s* (MCA)<br>(-14.8 → - 18.6) | = (G)<br>+ 3.80 (GM)<br>- 19.8 cm/s* (MCA)<br>(-19.3 → - 20.6) | + 16 → - 6.50   | + 42.1 → - 6.25  | ↑ R motor area, R supplementary motor area, R dorsal premotor cort., hippocampus, ant. cingulate cort., R cerebellum.<br>↓ Hippocampus.                                                                                                                                                                                                                  | 106, 118-124                    |
|                                                             | B1 | Active lifestyle                                  | = (G/GM/WM)<br>↓ (G)<br>+ 5.66 (GM)                            | = (G/GM/WM)<br>↓ (G)<br>+ 12.8 (GM)                            | + 20.2 → -      | + 62.9 → -       | ↑ F GM, F WM, P GM, P WM, precuneus, O reg., O-P area, post. cingulate cort., default mode network.<br>↓ F-central reg.                                                                                                                                                                                                                                  | 23, 98, 125-136                 |
|                                                             | C1 | 10d training<br>cessation                         | = (GM)                                                         | = (GM)                                                         | - 39.0 → - 8.60 | - 57.2 → - 31.6  | ↓ L inf. T gyr., L fusiform gyr., L inf. P lobe, R cerebellar tonsil, R lingual gyr., precuneus, bil. Cerebellum, bil. Hippocampus.                                                                                                                                                                                                                      | 137                             |
| Pressure changes<br>Altitude                                | C1 | HA – Short stay<br>(hours)                        | + 9.65 (G)<br>(9.10 → 10.2)<br>= (G)                           | + 30.1 (G)<br>(24.0 → 36.2)<br>= (G)                           | ↑               | + 9.10 → + 32.8  | ↑ F area, P area, lat. And med. T lobe, O area, hypothalamus, pons, striatum, thalamus, cerebellum.                                                                                                                                                                                                                                                      | 138-149                         |
|                                                             | C3 | HA – Medium<br>stay (days)                        | + 5.40 (G)<br>+ 8.90 cm/s* (MCA)<br>(4.30 → 19.0)<br>=* (MCA)  | + 13.0 (G)<br>+ 15.0 cm/s* (MCA)<br>(7.10 → 31.0)<br>=* (MCA)  |                 |                  |                                                                                                                                                                                                                                                                                                                                                          | 89, 104, 144-146, 148, 150-157  |
|                                                             | C3 | HA – Long stay<br>(weeks/months/<br>years/native) | = (G/MCA*)<br>+ 3.00 cm/s* (MCA)                               | = (G/MCA*)<br>+ 4.50 cm/s* (MCA)                               |                 |                  |                                                                                                                                                                                                                                                                                                                                                          | 143-145, 149, 155, 156, 158-163 |
|                                                             | C4 | Back after HA                                     | ↕= (GM/MCA*)<br>- 22.0 cm/s* (MCA)                             | ↕= (GM/MCA*)<br>- 32.4 cm/s* (MCA)                             | ↕               | ↕                | ↑ Some cortical areas.<br>↓ T reg., L FT area.                                                                                                                                                                                                                                                                                                           | 147, 148, 154, 160, 164, 165    |
| Divers <sup>H</sup>                                         | C4 | Divers                                            | ↓ (G)                                                          | ↓ (G)                                                          | ↓               | ↓                | ↓ Several ROI.                                                                                                                                                                                                                                                                                                                                           | 166, 167                        |
|                                                             | C4 | Former divers                                     |                                                                |                                                                | ↓               | ↓                | ↓ Distinct reg. in F lobe, parts of post. lobe of the cerebellum.                                                                                                                                                                                                                                                                                        | 168                             |
| Blood pressure<br>– Hypotension<br>(SBP < 100<br>DBP < 60)  | C4 | Orthostatic                                       | = (GM)<br>- 0.53 cm/s* /mmHg<br>(MCA)<br>(- 0.48 → - 0.57)     | = (GM)<br>- 0.83* /mmHg<br>(MCA)<br>(- 0.82 → - 0.83)          | ↕               | ↕                | ↑ Insula.<br>↓ Sensorimotor cort. (leg) (BA1-4), ant. cingulate cort. (BA24/32), inf. thalamus, inf. ant. insular, R inf. post. insular.                                                                                                                                                                                                                 | 112, 169-175                    |
| Blood pressure<br>– Hypertension<br>(SBP > 150<br>DBP > 90) | B1 | Chronic                                           | ↓ (G/GM/WM)<br>= (GM/WM)                                       | ↓ (G/GM/WM)<br>= (GM/WM)                                       | - 26.9 → +      | - 52.9 → +       | ↑ T-P reg.,<br>↓ F, Lat. Inf. F gyr., L OrbitoF reg., L lat. Sup. F gyr., R F reg., L R-P reg., P, L inf. P reg., R P reg., T reg., lower T reg., L T-P reg., T, L sup. T cort., L mid. T cort., O, med. precuneus, putamen, globus pallidus, head of caudate, L hippocampus, ant. cingulate cort., L post. cingulate cort., subcallosal reg., thalamus, | 19, 63, 176-184                 |

|                               |    |                                     |                                                 |                                                 |                 |                 |                                                                                                                                                                                                                                                                                                                                                                                                                                                                                                                                                                                                                                                                                                                                                                                                                                                                                                                                                                                                                                                                            |             |
|-------------------------------|----|-------------------------------------|-------------------------------------------------|-------------------------------------------------|-----------------|-----------------|----------------------------------------------------------------------------------------------------------------------------------------------------------------------------------------------------------------------------------------------------------------------------------------------------------------------------------------------------------------------------------------------------------------------------------------------------------------------------------------------------------------------------------------------------------------------------------------------------------------------------------------------------------------------------------------------------------------------------------------------------------------------------------------------------------------------------------------------------------------------------------------------------------------------------------------------------------------------------------------------------------------------------------------------------------------------------|-------------|
| Heart rate <sup>z</sup>       | C4 |                                     | ↑ (G)<br>= (MCA*)                               | ↑ (G)<br>= (MCA*)                               | ↓               | ↓               | ↓ R sup. T gyr., L parahippocampal gyr., L putamen, L amygdala, dorsorostral insula, R ventral hippocampus.                                                                                                                                                                                                                                                                                                                                                                                                                                                                                                                                                                                                                                                                                                                                                                                                                                                                                                                                                                | 73, 185     |
| Body temperature <sup>l</sup> | C2 | Hyperthermia                        | - 5.21 /°C (G)<br>(- 2.72 → - 7.70)<br>= (G/GM) | - 10.2 /°C (G)<br>(- 5.48 → - 15.0)<br>= (G/GM) | - 5.94 → + 8.05 | - 10/3 → + 16.1 | ↑ L dorsolat. preF cort., orbitoF cort., L inf. P lobe, L mid. T gyr., R sup. T gyr., R angular, L dorsal thalamus, post. cingulate cort., R mid. cingulate, L cerebellum.<br>↓ Precentral gyr., postcentral gyr., R sup. P lobe, R sup. T gyr., R fusiform gyr., L lingual gyr., precuneus, R cuneus, parahippocampal gyr., R hippocampus, R amygdala, ant. corpus callosum, ant. cingulate cort.                                                                                                                                                                                                                                                                                                                                                                                                                                                                                                                                                                                                                                                                         | 99, 186-195 |
| Mobile phone <sup>j</sup>     | A4 | During use<br>(+ task) <sup>z</sup> | = (G/GM/WM)                                     | = (G/GM/WM)                                     | ↕               | ↕               | ↑ L sup. F gyr. (BA10), R mid. F gyr. (BA8/9), R med. F gyr. (BA10), L ant. cingulate (BA32).<br>↓ T lobe (BA41), L fusiform gyr. (BA37).                                                                                                                                                                                                                                                                                                                                                                                                                                                                                                                                                                                                                                                                                                                                                                                                                                                                                                                                  | 196-198     |
|                               | C4 | During use<br>(resting)             | = (MCA*)                                        | = (MCA*)                                        | =               | =               | = Prefrontal areas, inf. T cort.                                                                                                                                                                                                                                                                                                                                                                                                                                                                                                                                                                                                                                                                                                                                                                                                                                                                                                                                                                                                                                           | 199, 200    |
|                               | C4 | After use (+ task)                  |                                                 |                                                 | ↕               | ↕               | ↑ L dorsolat. PF cort. reg. (BA6/31/45), L inf. F gyr. (BA9/44), L mid. F gyr. (BA6), postcentral gyr. (BA2).<br>↓ R posterior lobe cerebellum.                                                                                                                                                                                                                                                                                                                                                                                                                                                                                                                                                                                                                                                                                                                                                                                                                                                                                                                            | 201         |
|                               | C4 | After use (+ resting)               | = (MCA*)                                        | = (MCA*)                                        | =               | =               | = Prefrontal areas, inf. T cort.                                                                                                                                                                                                                                                                                                                                                                                                                                                                                                                                                                                                                                                                                                                                                                                                                                                                                                                                                                                                                                           | 199, 200    |
| Diet                          | C4 | High nitrate                        | = (G)                                           | = (G)                                           | ↑               | ↑               | ↑ Subcortical WM F lobe, deep WM F lobe, between dorsolateral prefrontal cort. reg. and anterior cingulate cort.                                                                                                                                                                                                                                                                                                                                                                                                                                                                                                                                                                                                                                                                                                                                                                                                                                                                                                                                                           | 202         |
|                               | C4 | Fasting<br>(Ramadan)                | = (MCA*)                                        | = (MCA*)                                        |                 |                 |                                                                                                                                                                                                                                                                                                                                                                                                                                                                                                                                                                                                                                                                                                                                                                                                                                                                                                                                                                                                                                                                            | 203         |
| Hunger/Satiety                | B4 | Satiety<br>(immediately after meal) |                                                 |                                                 | ↕               | ↕               | ↑ Dorsolat. preF cort., ventromed. preF cort., dorsomed. preF gyr., ventrolat. preF cort., F operculum (BA44), inf. P reg., O-T cort., piriform cort., angular cort., insula/claustrium, precuneus, post. cingulate cort. (BA29), amygdala, cerebellum.<br>↓ Mid. F gyr., dorsolat. preF cort., post. orbitoF reg., F operculum (BA44/45), ant. T cort., mid. T cort., fusiform gyr., precuneus, hypothalamus, angular cort., insula/claustrium, thalamus, ant. cingulate cort., hippocampus, parahippocampal area, caudate, nucleus accumbens, putamen, post. cingulate cort. (BA31), amygdala, midbrain, cerebellum.                                                                                                                                                                                                                                                                                                                                                                                                                                                     | 204-207     |
| Fat intake <sup>k</sup>       | C3 |                                     |                                                 |                                                 | ↕               | + → - 12.5      | ↑ F operculum.<br>↓ Hypothalamus.<br>= Insula, thalamus.                                                                                                                                                                                                                                                                                                                                                                                                                                                                                                                                                                                                                                                                                                                                                                                                                                                                                                                                                                                                                   | 208, 209    |
| Sugar intake                  | C4 | Glucose (15-60 min)                 | = (ICA*/VA*)                                    | = (ICA*/VA*)                                    | ↓               | ↓               | ↓ Hypothalamus, thalamus, insula, ant. cingulate cort., striatum.<br>= Hippocampus, post. cingulate cort., fusiform gyr., visual cort.                                                                                                                                                                                                                                                                                                                                                                                                                                                                                                                                                                                                                                                                                                                                                                                                                                                                                                                                     | 210-212     |
|                               | C4 | Fructose (15-60 min)                |                                                 |                                                 | ↕               | ↕               | ↑ Hypothalamus.<br>↓ Thalamus, hippocampus, post. cingulate cort., fusiform cort., visual cort..<br>= Insula, anterior cingulate cort., striatum.                                                                                                                                                                                                                                                                                                                                                                                                                                                                                                                                                                                                                                                                                                                                                                                                                                                                                                                          | 210         |
| Thirst                        | B4 | Thirst                              |                                                 |                                                 | ↕               | ↕               | ↑ L sup. F gyr., L mid. F gyr., R med. F gyr., L inf. F gyr., pre- and postcentral gyr., supplementary motor cort., inf. P lobe, mid. T gyr., R sup. T gyr., lingual gyr., mid. O cort., (pre)cuneus, fusiform gyr., L cingulate cort., L ant. cingulate cort. (BA24), post. cingulate cort. (BA26/29), L midcingulate cort. (BA32), R post. centrum, thalamus, pulvinar (thalamus), parahippocampal reg., insula, medullary reticular formation, periaqueductal grey, ventral pons, R cerebellar culmen, cerebellar declive, vermal reg., central lobule ant. hemisphere cerebellum, pyramis.<br>↓ L sup. F gyr., rectal gyr., sup. orbital gyr., L mid. F gyr., R med. F gyr., L inf. F gyr., L inf. T gyr., R sup. T gyr., L ant. cingulate cort. (BA24), post. cingulate cort. (BA26/29), R caudate, pallidum, striatum, substantia nigra, subthalamus, nucleus accumbens, ventral tegmentum, midbrain, R thalamus, pulvinar (thalamus), hypothalamus, R hippocampus, parahippocampal reg., ventral pons, R cerebellar culmen, tonsil posterior hemisphere cerebellum. | 213-219     |
|                               | B4 | Satiation                           |                                                 |                                                 | ↕               | ↕               | ↑ Precentral gyr., mid., inf. and sup. F cort., orbitoF cort., S1/M1, inf. P lobe, supramarginal gyr., sup. T gyr., mid. T gyr., precuneus, putamen, post. cingulate cort., ant. cingulate cort., midcingulate cort., lat. post. thalamus, insula, ant. quadrangular lobule, gracile lobule, fastigial nucleus, biventer, posterior lobule, R tonsil hemisphere, biventer lobule posterior hemisphere.<br>↓ Ant. quadrangular lobule, posterior lobule, central lobule, inf. semilunar lobule.                                                                                                                                                                                                                                                                                                                                                                                                                                                                                                                                                                             | 216-219     |

## Additional information table 2

### **A – Age**

- The decline in cerebral perfusion caused by increasing age appears to be the **steepest** after the age of 40-50 year.<sup>3,24,33,39,42,44</sup>
- Some studies mention an **interaction between gender and age** in their effects on cerebral perfusion: one study reported a lack of change in cerebral perfusion in women<sup>16</sup> or in men,<sup>43</sup> but other gender interactions with age on cerebral perfusion have been described as well.<sup>2,29,36</sup>
- One study reported no effects of age on cerebral perfusion after correcting for **partial volume effects**,<sup>11</sup> although other studies found no association between brain atrophy and cerebral perfusion.<sup>33</sup>
- Other **ASL related parameters** are simultaneously influenced by age: a global decrease of T1 and the magnitude of the peak ASL signal (dMmax) have been observed with increasing age, as well as a decrease in M0 in the MCA and ACA region in women, and globally in men; and an increased T-value in PCA region.<sup>29,54</sup> Moreover, an increase in arterial-arteriole transit time (aaTT) with an average of 0.21%/year (range 0-0.8%/year) and bolus arrival time (BAT) (1.2-2.1%/year) in the posterior cingulate, precuneus and global grey matter was reported,<sup>30</sup> an effect which was contradicted by another study.<sup>54</sup> Mean transit time (MTT) appears to be increased in grey matter (0.38%/year) and white matter (0.19%/year) with age.<sup>36</sup>
- In children, an **inverted U effect** caused by age on perfusion has been observed in several studies with a peak of global perfusion between the ages of 5 and 9 years old,<sup>48,52,53,55</sup> although another study reported a constant perfusion until the age of 10-12 year.<sup>49</sup>
- In children, a gender effect on the influence of age on regional perfusion has been observed during midpuberty, with an increase of perfusion in women, whereas perfusion is decrease in men.<sup>56</sup>
- In children, a negative correlation between age and M0 has been observed, but not with BAT.<sup>54</sup>

### **B – Occupation/retirement**

- After reaching retirement-age, the decline of perfusion, partly caused by ageing, can be delayed by continuing working or participating in regular physical activities.<sup>57</sup>

### **C – Gender**

- The effect of gender on cerebral perfusion may vanish when corrected for the well-known gender difference in **hematocrit**.<sup>60</sup>
- The **interaction between gender and age** in their effects on cerebral perfusion is not completely clear. For example one study reported the effects of gender on perfusion starting at the age of 50 years,<sup>33</sup> although other studies have reported this effect only during the female reproductive years<sup>43,220</sup> or before the age of 60.<sup>39</sup> The decrease in perfusion caused by age appears to be slower in women,<sup>29</sup> although distinct results have been reported as well.<sup>30</sup>
- Furthermore, a decrease in bolus arrival time (BAT) (-33 - -50%) and arterial arteriole transit time (aaTT) (-12.1 - -22%) has been reported.<sup>30</sup>

### **D – Menopause**

- The effect of menopause on cerebral perfusion is reported not to depend on age nor time since the start of the menopause.<sup>71</sup>

### **E – Diurnal rhythm**

- Blood flow velocity in the middle cerebral artery (MCAv) has been observed to behave as a cosine function throughout the day, with the minimum in velocity around noon.<sup>72</sup>

### **F – Physical exercise**

- The discrepancies in the reported effects of acute exercise might be partially explained by the changes in the **partial arterial tension of CO<sub>2</sub>**.<sup>81,85,101,108</sup>
- The effects of acute exercises on cerebral perfusion is reported to depend on several factors such as the **load and type** of exercise.<sup>23,79,84,101,102,109,118</sup>
- Blood flow velocity of the middle cerebral artery appears to peak at an intensity of 60% of the **maximal oxygen uptake (VO<sub>2</sub>max)**, and tends to decline at higher intensities.<sup>82,86,92,97,98,104,114</sup>
- The magnitude of the effects of acute exercises on cerebral perfusion were reported to be bigger in **active** volunteers compared to sedentary volunteers.<sup>98</sup>
- An **interaction between physical exercise and age** on cerebral perfusion has been reported,<sup>34,97</sup> but this was not reported in another study.<sup>51</sup>

### **G – Physical training**

- Effects of long-life training has been reported to depend on the **age** of the subject.<sup>23,122,123,128,129,131</sup>
- The so called "age" of the MCA appears to be 10 year lower in elderly who exercised during their life, compared to sedentary elderly.<sup>23</sup>
- A positive association between **aerobic or cardiorespiratory fitness** and grey matter, white matter and hippocampal perfusion has been observed.<sup>123,133</sup>

### **H – Pressure changes - Divers**

- In former divers, the **bolus arrival time** (BAT) of the putamen, basal ganglia, posterior lobe of the cerebellum, distinct frontal lobe regions and the dorsolateral prefrontal cortex have been reported to be shorter.<sup>168</sup>

### **I – Body temperature**

- Even after 15 minutes of hyperthermia, perfusion changes are still present.<sup>195</sup>
- The influence of hypothermia on cerebral perfusion has only been investigated in **neonates** undergoing cardiopulmonary bypass! A linear decrease between body temperature and cerebral perfusion has been reported.<sup>221</sup>

### **J – Mobile phone**

- The regional effects described have been reported to be located on the **ipsilateral** side of where the phone was held. The effects last even after 30 minutes after exposure.<sup>201</sup>

### **K – Fat intake**

- The effects of fat intake on cerebral perfusion have been reported to be present for approximately a half an hour after fat intake and were still measurable after 2 hours.<sup>208,209</sup>

Supplementary table 3. Blood components group of perfusion-modifying factors sorted according to the relevance of the effect in the field of neuroimaging. Absolute values correspond to ml/100g/min, except if stated otherwise; relative value correspond to a percentage (%).

| Factor                                 | Cat. | Subcategory        | Global effect                                                                                                               |                                                                                                                            | Regional effect           |                           | Ref                                                                                                                                                                                                                                      |                                                                                   |
|----------------------------------------|------|--------------------|-----------------------------------------------------------------------------------------------------------------------------|----------------------------------------------------------------------------------------------------------------------------|---------------------------|---------------------------|------------------------------------------------------------------------------------------------------------------------------------------------------------------------------------------------------------------------------------------|-----------------------------------------------------------------------------------|
|                                        |      |                    | Absolute (ml/100g/min)                                                                                                      | Relative (%)                                                                                                               | Absolute (ml/100g/min)    | Relative (%)              |                                                                                                                                                                                                                                          | Regions                                                                           |
| Blood gases - hypoxia <sup>A</sup>     | B2   | Acute              | + 0.43 /ΔmmHg (G)<br>(0.26 → 0.59)<br>+ 0.14 /ΔmmHg (GM)<br>(0.09 → 0.18)<br>= (G/GM)                                       | +0.87 /ΔmmHg (G)<br>(0.44 → 1.30)<br>+ 0.20 /ΔmmHg (GM)<br>(0.15 → 0.24)<br>= (G/GM)                                       |                           |                           |                                                                                                                                                                                                                                          | 116, 151,<br>222-248                                                              |
| Blood gases - hypercapnia <sup>B</sup> | A1   | Acute <sup>≠</sup> | +1.65 /ΔmmHg (G)<br>[23-60m mHg]<br>(0.80 → 2.89)<br>+ 2.67 /ΔmmHg (GM)<br>[23-60mmHg]<br>+ 0.46 /ΔmmHg (WM)<br>[23-60mmHg] | +3.95 /ΔmmHg (G)<br>[23-60mmHg]<br>(0.95 → 8.99)<br>+ 4.17 /ΔmmHg (GM)<br>[23-60mmHg]<br>+ 1.16 /ΔmmHg (WM)<br>[23-60mmHg] | + 0.87 → + 7.25<br>/ΔmmHg | + 2.08 → + 12.0<br>/ΔmmHg | ↑ F GM, F WM, R mid. F gyr., R med. Sup. F gyr., central, T, R sup. T reg., R mid. T reg., P, O GM and WM, L mid. O reg., visual cort., R insular, R hippocampus and parahippocampal reg., putamen, thalamus, ant. cingulum, cerebellum. | 62, 150,<br>175, 233,<br>234, 236-<br>241, 247-<br>278                            |
| Blood gases – hypocapnia <sup>C</sup>  | A1   | Acute <sup>≠</sup> | - 0.98 /ΔmmHg (G)<br>[23-60mmHg]<br>(- 0.37 → - 1.72)<br>- 1.22 /ΔmmHg (GM)<br>[23-60mmHg]<br>(- 0.51 → - 1.93)<br>= (WM)   | - 2.04 /ΔmmHg (G)<br>[23-60mmHg]<br>(- 1.16 → - 2.69)<br>- 2.36 /ΔmmHg (GM)<br>[23-60mmHg]<br>(- 1.22 → - 3.50)<br>= (WM)  | -3.04 → - 4.60<br>/ΔmmHg  | -6.58 → - 7.39<br>/Δmm.Hg | ↓ F cort., P cort., T cort., O cort., thalamus, putamen, cerebellum.                                                                                                                                                                     | 53, 62, 157,<br>233, 234,<br>236, 237,<br>245, 247,<br>248, 269-<br>283           |
| Blood gases – hyperoxia <sup>D</sup>   | B1   | Acute              | - 0.44 /ΔmmHg (G)<br>(- 0.04 → - 0.84)<br>- 0.05 /ΔmmHg (GM)<br>- 0.02 /ΔmmHg (WM)<br>= (G/GM/WM)<br>↑ (WM)                 | - 0.69 /ΔmmHg (G)<br>(- 0.07 → - 1.31)<br>- 0.07 /ΔmmHg (GM)<br>- 0.06 /ΔmmHg (WM)<br>= (G/GM/WM)<br>↑ (WM)                | - 5.04 → + 27.7           | - 8.23 → + 17.5           | ↑ R F cort., O cort., striatum, thalamus.<br>↓ FT paramedical cort.                                                                                                                                                                      | 150, 151,<br>228, 231,<br>233, 234,<br>236, 257,<br>262, 266,<br>279, 284-<br>293 |
| Hematocrit                             | B1   | Higher             | - 0.73 %Hct (G)<br>(- 0.32 → - 1.55)<br>- 1.38 %Hct (GM)<br>(- 0.47 → - 2.47)<br>- 0.38 %Hct (WM)                           | - 2.28 %Hct (G)<br>(- 0.64 → - 3.50)<br>- 1.93 %Hct (GM)<br>(- 0.59 → - 4.21)<br>- 1.90 %Hct (WM)                          | ↓                         | ↓                         | ↓ Post. cingulate cort.                                                                                                                                                                                                                  | 60, 62, 294-<br>301                                                               |
| Blood viscosity                        | C4   | Increase           | = (GM)                                                                                                                      | = (GM)                                                                                                                     | ↑                         | ↑                         | ↑ L P reg., P reg., LT reg..                                                                                                                                                                                                             | 297, 302<br>303                                                                   |
| Hemoglobin                             | C2   | Higher Hb          | - 1.65 /g/dL HB (G)                                                                                                         | - 3.56 /g/dL HB (G)                                                                                                        | ↕                         | ↕                         | ↑ L inf. F gyr. (BA44), L sup. T gyr. (BA37), midline cuneus (BA17), R precuneus (BA19).<br>↓ Mid. F gyr. (BA9/11), inf. F gyr. (BA46), L sup. O gyr. (BA19), L precuneus (BA7), cerebellum.                                             | 298, 304-<br>306                                                                  |
| Fibrinogen                             | C2   |                    | - 3.20 (G)                                                                                                                  | - 6.43 (G)                                                                                                                 | ↓                         | ↓                         | ↓ P reg.                                                                                                                                                                                                                                 | 178, 297                                                                          |

|                                           |    |              |                                                           |                                                           |                            |                            |                                                                                                                                                                                                                                                                                                                                                                                                                                       |                 |
|-------------------------------------------|----|--------------|-----------------------------------------------------------|-----------------------------------------------------------|----------------------------|----------------------------|---------------------------------------------------------------------------------------------------------------------------------------------------------------------------------------------------------------------------------------------------------------------------------------------------------------------------------------------------------------------------------------------------------------------------------------|-----------------|
| <b>Blood glucose – hypoglycaemia</b><br>E | B3 | <3.6 mmol/L  | + 2.76 /mmol/L (G)<br>(1.20 → 5.20)<br>- 1.70 /mmol/L (G) | + 5.58 /mmol/L (G)<br>(2.10 → 9.30)<br>- 2.90 /mmol/L (G) | - 1.82 → + 2.69<br>/mmol/L | - 2.93 → + 5.19<br>/mmol/L | ↑ F reg., preF cort., R med. F cort., R orbital preF cort., orbitoF cort., P reg., L sup. P cort., somatosensory cort., T reg., O reg., thalamus, basal ganglia, L ventral striatum, globus pallidus, insula, R pulvinar thalamus, thalamus, medial thalamus, ant. cingulate cort., pituitary, periaqueductal grey, brainstem, pons, cerebellum.<br>↓ T cort., inf. T cort., retrosplenial cort., hippocampus, brainstem, cerebellum. | 307-315         |
| <b>Circulating homocysteine</b>           | C1 | Increase     | - 2.38 /μmol/L (G)<br>= (MCA*)                            | - 4.33 /μmol/L (G)<br>= (MCA*)                            | ↕                          | ↕                          | ↑ P. reg.<br>↓ F. reg.                                                                                                                                                                                                                                                                                                                                                                                                                | 62, 316,<br>317 |
| <b>Cholesterol</b>                        | C4 | Total chol.  | = (GM)                                                    | = (GM)                                                    | ↓                          | ↓                          | ↓ P cort., T-P cort., T cort.                                                                                                                                                                                                                                                                                                                                                                                                         | 63, 318         |
|                                           | C4 | LDL          | - 0.80 cm/s (MCA*)<br>= (MCA*)                            | - 1.12 (MCA*)<br>= (MCA*)                                 | ↗                          | ↗                          |                                                                                                                                                                                                                                                                                                                                                                                                                                       | 319-321         |
|                                           | C4 | HDL          |                                                           |                                                           | ↓                          | ↓                          | ↓ P cort., T-P cort., T cort.                                                                                                                                                                                                                                                                                                                                                                                                         | 318             |
| <b>Hyperketonemia</b>                     | C1 | Acute        | + 19.9 (G)                                                | + 39.0 (G)                                                | ↗                          | ↗                          |                                                                                                                                                                                                                                                                                                                                                                                                                                       | 322             |
|                                           | C3 | After 3 days | = (G)                                                     | = (G)                                                     | ↗                          | ↗                          |                                                                                                                                                                                                                                                                                                                                                                                                                                       | 323             |
| <b>ADMA</b>                               | C3 |              | = (G)                                                     | = (G)                                                     | -1.25                      | -1.04                      | ↓ Basal ganglia.                                                                                                                                                                                                                                                                                                                                                                                                                      | 62, 324         |
| <b>Free fatty acids</b>                   | C4 |              |                                                           |                                                           | ↕                          | ↕                          | ↑ Dorsolat. and dorsomed. PF cort.<br>↓ (Vicinity of) ant. cingulate cort., L ventral preF cort., R hippocampus, R parahippocampal gyr., L insular cort.                                                                                                                                                                                                                                                                              | 204, 205        |

### Additional information table 3

#### A - Blood gasses - Hypoxia

- Both a steady increase of cerebral perfusion during the first 10 minutes of hypoxia towards a steady state (measured in the ICA),<sup>233</sup> as an immediate response of cerebral perfusion on hypoxia in the order of seconds (measured in the MCA)<sup>239</sup> have been reported. Both studies report an normalization of cerebral perfusion immediately after the end of the hypoxia.
- An interaction between CO<sub>2</sub> and O<sub>2</sub> in their effect on cerebral perfusion has been reported.<sup>236</sup>

#### B – Blood gasses - Hypercapnia

- An immediate effect of an increased and normalized CO<sub>2</sub> on cerebral perfusion has been reported.<sup>239</sup>
- In most subjects, the influence of changing CO<sub>2</sub> on perfusion comprises two phases of variable increase in cerebral perfusion. Only in a few subjects, an immediate increase towards to a steady state has been observed.<sup>264</sup>
- Between the range of 23 mmHg and 60 mmHg CO<sub>2</sub>, a linear association between cerebral perfusion and partial arterial tension of carbon dioxide (P<sub>a</sub>CO<sub>2</sub>) has been reported. Outside this range, the effect of CO<sub>2</sub> levels off.<sup>241, 270</sup>
- An interaction between CO<sub>2</sub> and O<sub>2</sub> in their effect on cerebral perfusion has been reported.<sup>236</sup>

#### C – Blood gasses - Hypocapnia

- The effects of hypocapnia on cerebral perfusion have been reported to comprise two components: after an initial fast decrease of perfusion, a slow adaptation to normalization has been reported after about 5 minutes of hypocapnia.<sup>233</sup>
- After the normalization of the CO<sub>2</sub> values, perfusion has been reported to restore immediately,<sup>280</sup> but distinct results have been reported.<sup>325</sup>
- Between the range of 23 mmHg and 60 mmHg CO<sub>2</sub>, a linear association between cerebral perfusion and P<sub>a</sub>CO<sub>2</sub> has been reported. Outside this range, the effect of CO<sub>2</sub> levels off.<sup>241, 270</sup>
- An interaction between CO<sub>2</sub> and O<sub>2</sub> in their effect on cerebral perfusion has been reported.<sup>236</sup>

#### D – Blood gasses - Hyperoxia

- An interaction between CO<sub>2</sub> and O<sub>2</sub> in their effect on cerebral perfusion has been reported as cerebral perfusion has been reported only to be influenced by hyperoxia if the P<sub>a</sub>CO<sub>2</sub> is higher than 45-50 mmHg.<sup>233, 236</sup>

#### E – Blood glucose - Hypoglycaemia

- After 10 minutes of hypoglycaemia, an increase in cerebral perfusion has been reported.<sup>312</sup> The peak in cerebral perfusion occurs between 45 and 51 minutes of hypoglycaemia and the effects remain measurable even after 90 minutes of blood glucose normalization. Normalization of cerebral perfusion has been reported 24 hours after blood glucose normalization.<sup>312, 313</sup>

Supplementary table 4. Mental state, personality and cognition group of perfusion-modifying factors sorted according to the relevance of the effect in the field of neuroimaging. Absolute values correspond to ml/100g/min, except if stated otherwise; relative values correspond to a percentage (%).

| Factor                         | Cat. | Subcategory     | Global effect                   |                                 | Regional effect        |                 | Ref                                                                                                                                                                                                                                                                                                                                                                                                                                                                                                                                                                                                                                                                                                                                                                                                                                                                                                                                                                                       |                   |
|--------------------------------|------|-----------------|---------------------------------|---------------------------------|------------------------|-----------------|-------------------------------------------------------------------------------------------------------------------------------------------------------------------------------------------------------------------------------------------------------------------------------------------------------------------------------------------------------------------------------------------------------------------------------------------------------------------------------------------------------------------------------------------------------------------------------------------------------------------------------------------------------------------------------------------------------------------------------------------------------------------------------------------------------------------------------------------------------------------------------------------------------------------------------------------------------------------------------------------|-------------------|
|                                |      |                 | Absolute (ml/100g/min)          | Relative (%)                    | Absolute (ml/100g/min) | Relative (%)    |                                                                                                                                                                                                                                                                                                                                                                                                                                                                                                                                                                                                                                                                                                                                                                                                                                                                                                                                                                                           | Regions           |
| Stress <sup>A</sup>            | C3   |                 | = (G)                           | = (G)                           | ↑                      | ↑               | ↑ R ventral preF cort., ant. cingulate cort., insula, putamen, cerebellum.                                                                                                                                                                                                                                                                                                                                                                                                                                                                                                                                                                                                                                                                                                                                                                                                                                                                                                                | 326, 327          |
| Anxiety <sup>B</sup>           | B1   | All             | - 10.1 (G)<br>(- 9.80 → - 10.4) | - 12.9 (G)<br>(- 12.5 → - 13.2) | - 25.7 → +             | - 23.3 → +      | ↑ Dorsolat. preF cort., orbitoF cort., L ventrolat. preF cort., postcentral gyr., sup. P lobe, T poles, putamen, L midcingulate cort., ant. cingulate cort., ant. insula, L nucleus caudatus, cerebellum.<br>↓ F cort., high F cort., preF cort., dorsolat. preF cort., medial preF cort., orbitoF cort., P cort., R inf. P lobe, high P cort., LT cort., temporopolar cort., R mid. T cort., O cort., R infralimbic cort., thalamic area, L hippocampus.                                                                                                                                                                                                                                                                                                                                                                                                                                                                                                                                 | 328-335           |
|                                | C4   | Low → Moderate  | ↑                               | ↑                               | ↑                      | ↑               | ↑ OrbitoF cort. (BA4/14), preF cort. (BA8), sensorymotor cort. (BA5/6/16), P cort. (BA7), midT-P cort. (BA9), post. T-P, cort. (BA10).                                                                                                                                                                                                                                                                                                                                                                                                                                                                                                                                                                                                                                                                                                                                                                                                                                                    | 335, 336          |
|                                | C4   | Moderate → High | ↓                               | ↓                               | ↓                      | ↓               | ↓ OrbitoF cort. (BA4/14), preF cort. (BA8), sensorymotor cort. (BA5/6/16), P cort. (BA7), midT-P cort. (BA9), post. T-P, cort. (BA10).                                                                                                                                                                                                                                                                                                                                                                                                                                                                                                                                                                                                                                                                                                                                                                                                                                                    | 335, 336          |
| Yoga / meditation <sup>C</sup> | C4   | During exercise | = (G)                           | = (G)                           | ↕                      | ↕               | ↑ Sup. and inf. F gyr. (BA41/42), med. preF cort., R paracentral lobule (BA31), L precentral gyr. (BA6), postcentral gyr. (BA43), sup. and inf. P lobe, sup., mid. and inf. T gyr., sup., mid. and inf. O gyr., lingual gyr., fusiform gyr., L hippocampus, parahippocampal gyr., cingulate gyr., L caudate, insula, L amygdala.<br>↓ Sup. F gyr. (BA8), orbital gyr. (BA11), L med. F gyr. (BA25), L precentral gyr., L sup. P lobe (BA7), R inf. P lobe (BA40), inf. T gyr. (BA20), L mid. O gyr. (BA19), R inf. O cort., L sup. O cort., angular gyr., fusiform gyr. (BA20/37) R (pre)cuneus (BA19), L lentiform nucleus.                                                                                                                                                                                                                                                                                                                                                              | 337-339           |
|                                | C4   | After exercise  | ↕                               | ↕                               | ↕                      | ↕               | ↑ Dorsolat. preF cort., inf. F cort., orbitoF cort., R precentral gyr., dorsomedial cort., sensorimotor cort., precuneus, midbrain, ant. and post. cingulate cort., cingulate body, thalamus, L insula.<br>↓ Sup. P cort., L inf. T cort., R lat. T lobe.                                                                                                                                                                                                                                                                                                                                                                                                                                                                                                                                                                                                                                                                                                                                 | 339, 340          |
|                                | C4   | Experienced     | ↕                               | ↕                               | ↑                      | ↑               | ↑ Pref cort., mid. F cort., P cort., inf. T lobe, thalamus, putamen, caudate, L insula, amygdala, brainstem, cerebellum.                                                                                                                                                                                                                                                                                                                                                                                                                                                                                                                                                                                                                                                                                                                                                                                                                                                                  | 340, 341          |
| Mood                           | B3   | Sad             | ↑ (G)                           | ↑ (G)                           | - 2.50 → + 1.80        | - 4.73 → + 3.81 | ↑ Pref cort. (BA9), L med. preF cort. (BA25), L orbitoF cort., R med. F gyr., R sup. F gyr. (BA6), precentral gyr. (BA4/6), sup. T gyr. (BA22/38/39), R mid. T gyr. (BA21/22), L inf. T gyr. (BA20), R inf. T gyr. (BA37), R ant. T area (BA21), T-O cort., R mid. O gyr. (BA18), R inf. O gyr. (BA18), fusiform gyr. (BA19/36/37), cuneus, primary visual cort. (BA17), L cingulate gyr., ant. cingulate cort., R putamen, caudate, L insula, thalamus, hypothalamus, midbrain, amygdala, hippocampus, L parahippocampal gyr. (BA28), O-T cort. (BA18/19/37), cerebellum.<br>↓ OrbitoF gyr. (BA11), inf. F lobule (BA10/46), L mid. F gyr. (BA46), inf. P lobule (BA7/40), R sup. T gyr., R midT gyr., inf. T lobule (BA20), lat. and med. O gyr., R O cort., R mid. O gyr. (BA18), R precuneus (BA7), L cuneus (BA18), lingual gyrus (BA18/19), primary visual cort. (BA17), secondary visual cort. (BA18/19), L cingulate gyr. (BA31), L amygdala, hippocampus, L parahippocampal gyr. | 171, 342-349      |
|                                | B3   | Happy           | = (G)<br>↑ (MCA*)               | = (G)<br>↑ (MCA*)               | - 1.4 → +              | - 2.84 → +      | ↑ L sup. F gyr., preF cort. (BA9), P operculum, mid. post. T cort., sup. T gyr. (BA22/39), mid T gyr. (BA21), T pole, R mid. and inf. O gyr. (BA18), primary and secondary visual cort., R entorhinal cort., L lingual gyr. (BA18), L ant. cingulate cort., fusiform gyr. (BA36/37), caudate, L putamen, ventral striatum, thalamus, hypothalamus, midbrain, cerebellum.<br>↓ L orbitoF cort. (BA11), inf. med. F cort., inf. F lobule (BA10/46), L mid. F gyr. (BA8), L sup. F gyr. (BA10), L precentral cort., R sup. F gyr., R P operculum, inf. P lobule (BA7/40), mid. T gyr. (BA20/21), L inf. T cort., O-T cort., L precuneus, ant. cingulate cort., L mid. cingulate, L post. cingulate cort. (BA23), cerebellum.                                                                                                                                                                                                                                                                 | 171, 342-348, 350 |
|                                | C4   | Disgust         | ↕                               | ↕                               | ↕                      | ↕               | ↑ Inf. mid. T gyr., fusiform gyr., primary visual cort., secondary visual cort., dorsal ant. cingulate cort. (BA32), thalamus, cerebellum.<br>↓ R dorsolat. F cort., inf. med. F cort., R retrosplenial cingulate cort.,                                                                                                                                                                                                                                                                                                                                                                                                                                                                                                                                                                                                                                                                                                                                                                  | 348, 350          |
|                                | C4   | Worry           | ↕                               | ↕                               | ↕                      | ↕               | ↑ Ventrolat. preF cort. (BA10), orbito-F gyr., sup. T gyr. (BA42), R thalamus, R insula, R amygdala.<br>↓ Inf., mid. and sup. T gyr., R ant. T tip, O-T gyr., L supramarginal gyr., L angular gyr., hippocampus, insula, amygdala.                                                                                                                                                                                                                                                                                                                                                                                                                                                                                                                                                                                                                                                                                                                                                        | 351, 352          |
|                                | C4   | Anger           | ↕                               | ↕                               | ↑                      | ↑               | ↑ OrbitoF cort., sup. T gyr., mid. T gyr., insula, cerebellum.                                                                                                                                                                                                                                                                                                                                                                                                                                                                                                                                                                                                                                                                                                                                                                                                                                                                                                                            | 346               |



|                                       |    |                                     |                                    |                                    |           |           |                                                                                                                                                                                                                                                                                                                                                                                                                                              |               |
|---------------------------------------|----|-------------------------------------|------------------------------------|------------------------------------|-----------|-----------|----------------------------------------------------------------------------------------------------------------------------------------------------------------------------------------------------------------------------------------------------------------------------------------------------------------------------------------------------------------------------------------------------------------------------------------------|---------------|
| <b>Cognitive capacity<sup>D</sup></b> | B4 | ↑IQ (g factor)                      | = (G)<br>↑ (GM)                    | = (G)<br>↑ (GM)                    | ↑         | ↑         | ↑ R orbitoF cort., sup. T gyr., insula.                                                                                                                                                                                                                                                                                                                                                                                                      | 58, 353-355   |
|                                       | C4 | ↑Processing speed/attention         | ↑ (BA*/ICA*)<br>= (MCA*)           | ↑ (BA*/ICA*)<br>= (MCA*)           | ↕         | ↕         | ↑ Mid. and sup. F reg., calcarine sulcus, P reg., cerebellum.<br>↓ T gyr., O cort., putamen.                                                                                                                                                                                                                                                                                                                                                 | 22, 355-357   |
|                                       | C4 | ↑Attention                          | ↓ (GM)<br>= (GM)                   | ↓ (GM)<br>= (GM)                   | =         | =         | = F, T, P, O.                                                                                                                                                                                                                                                                                                                                                                                                                                | 32            |
|                                       | C4 | ↑Executive function                 | = (GM)<br>↑ (BA*/ICA*)             | = (GM)<br>↑ (BA*/ICA*)             | ↕         | ↕         | ↑ L ant. cingulate cort.<br>↓ Dorsal medioF gyr., putamen.                                                                                                                                                                                                                                                                                                                                                                                   | 185, 354-356  |
|                                       | C4 | ↑Fluid ability                      | ↑ (BA*/ICA*)                       | ↑ (BA*/ICA*)                       | ↕         | ↕         | ↑ Pref cort. areas, ant. cingulate cort.<br>↓ Precentral reg., T gyr., putamen.                                                                                                                                                                                                                                                                                                                                                              | 354, 355, 357 |
|                                       | C4 | ↑MMSE                               | = (BA*/ICA*)                       | = (BA*/ICA*)                       | ↕         | ↕         |                                                                                                                                                                                                                                                                                                                                                                                                                                              | 356           |
|                                       | B4 | ↑Memory perform.                    | = (G/MCA*/BA*/ICA*)<br>↑ (BA/ICA*) | = (G/MCA*/BA*/ICA*)<br>↑ (BA/ICA*) | ↕         | ↕         | ↑ Mid. orbitoF lobe, L nucleus caudatus, cerebellum.<br>↓ Sup. F gyrus, F operculum, postcentral gyr., mid. T gyr., T pole, T cort., R angular gyr., R ant. cingulate cort., post. cingulate cort., amygdala, hippocampus.                                                                                                                                                                                                                   | 22, 354-359   |
|                                       | C4 | Cognition (several tests)           | ↑ (GM)                             | ↑ (GM)                             | ↑         | ↑         | ↑ O-P reg.                                                                                                                                                                                                                                                                                                                                                                                                                                   | 19, 128, 356  |
|                                       | C4 | After short (30min) training        |                                    |                                    | ↑         | ↑         | ↑ R ventromed. preF cort., R sup. T cort., L cuneus, L ant. insula, L parahippocampal, R pulvinar, R peristriate, L post. cingulate cort.                                                                                                                                                                                                                                                                                                    | 360           |
|                                       | B1 | After long-term training (>4 weeks) | + 3.70 (G)<br>= (GM)               | + 7.90 (G)<br>= (GM)               | + → +16.6 | + → +39.0 | ↑ R inf. F cort., R lat. preF cort., R inf. F gyr., R mid. F gyr., L sup. med. F gyr., L T gyr., precuneus, L ant. cingulate cort., post. cingulate cort.                                                                                                                                                                                                                                                                                    | 361-363       |
| <b>Creativity</b>                     | C4 |                                     | ↑(GM)<br>= (WM)                    | ↑(GM)<br>= (WM)                    | ↕         | ↕         | ↑ Precentral gyr., culmen, L middle F gyr. (BA6/10), R F rectal gyr. (BA11), L F orbital gyr. (BA47), L inf. T gyr. (BA20).<br>↓ Precuneus.                                                                                                                                                                                                                                                                                                  | 353, 364      |
| <b>Personality traits</b>             | A4 | Extraversion                        | = (G/GM)                           | = (G/GM)                           | ↕         | ↕         | ↑ F cort. (BA10/11), Broca, mid. and sup. F gyr. (BA6), precentral gyr. (BA6), supplementary motor area (BA6/8), sup. P gyr. (BA7), supramarginal gyr. (BA40), ant. T cort. (BA20), (pre)cuneus (BA7), ant. cingulate cort., sup. ant. cingulate cort., post. cingulate cort., sup. post. cingulate cort., mid. cingulate (BA24), R ant. insular cort., R putamen, R caudate, thalamus, L hippocampus, cerebellum.<br>↓ T reg., central reg. | 365-370       |
|                                       | A4 | Introversion                        | = (G)                              | = (G)                              | ↑         | ↑         | ↑ T reg., central reg., ant. cingulate cort., R post. insular cort., L amygdala, pulvinar nucleus, T lobe (BA39).                                                                                                                                                                                                                                                                                                                            | 365, 366      |
|                                       | C4 | Novelty seeking                     |                                    |                                    | ↑         | ↑         | ↑ Cuneus, L ant. cingulate cort., R ant. insula, R post. insula, L thalamus, cerebellum.                                                                                                                                                                                                                                                                                                                                                     | 368, 371      |
|                                       | C4 | Psychoticism                        |                                    |                                    | ↓         | ↓         | ↓ R thalamus, R caudate, R putamen.                                                                                                                                                                                                                                                                                                                                                                                                          | 367, 368      |
|                                       | C4 | Harm avoidance                      |                                    |                                    | ↓         | ↓         | ↓ R sup. F gyr., R precentral gyr., R postcentral gyr., L inf. T gyr., L fusiform gyr., L parahippocampal gyr., R orbitoinsular junction,                                                                                                                                                                                                                                                                                                    | 368, 371      |
|                                       | C4 | Reward dependence                   |                                    |                                    | ↓         | ↓         | ↓ L sup. F gyr., R mid. F gyr., L precentral gyr., R sup. T gyr., L precuneus, ant. cingulate cort., R ant. insula, parahippocampal gyr.,                                                                                                                                                                                                                                                                                                    | 371           |
|                                       | C4 | Persistence                         |                                    |                                    | ↑         | ↑         | ↑ R caudate, R putamen.                                                                                                                                                                                                                                                                                                                                                                                                                      | 368           |
|                                       | C4 | Neuroticism                         | ↓ (GM)                             | ↓ (GM)                             | ↓         | ↓         | ↓ Mid F gyr. (BA6), orbitoF cort., supplementary motor area (BA6/8), T pole, (pre)cuneus (BA7), angular gyr., L amygdala, insula.                                                                                                                                                                                                                                                                                                            | 367-370       |

|                                      |    |                         |                                                                               |                                                                                |                               |                                                                              |                                                                                                                                                                                                                                                                                                                                                                                                                                                                                                                                                                                                                                                                                                                                                                                                                                                                                         |                                  |
|--------------------------------------|----|-------------------------|-------------------------------------------------------------------------------|--------------------------------------------------------------------------------|-------------------------------|------------------------------------------------------------------------------|-----------------------------------------------------------------------------------------------------------------------------------------------------------------------------------------------------------------------------------------------------------------------------------------------------------------------------------------------------------------------------------------------------------------------------------------------------------------------------------------------------------------------------------------------------------------------------------------------------------------------------------------------------------------------------------------------------------------------------------------------------------------------------------------------------------------------------------------------------------------------------------------|----------------------------------|
| Sleep <sup>E</sup>                   | C4 | Wake/Sleep trans.       | + 5.10 cm/s (MCA*)                                                            | + 11.1 (MCA*)<br>(9.70 → 12.5)                                                 |                               |                                                                              |                                                                                                                                                                                                                                                                                                                                                                                                                                                                                                                                                                                                                                                                                                                                                                                                                                                                                         | 372, 373                         |
|                                      | A1 | NREM <sup>F</sup>       | - 5.65 (G)<br>(- 3.60 → - 11.4)<br>- 13.0 (GM)<br>(- 4.00 → - 27.6)<br>= (WM) | - 14.0 (G)<br>(- 7.05 → - 18.63)<br>- 13.3 (GM)<br>(- 4.60 → - 28.5)<br>= (WM) | - 14.0 → +                    | - 29.0 → +                                                                   | ↑ L pericentral cort. (BA3/4), L inf. P lobule (BA40), L post. sup. T gyr. (BA22), ant. mid. T gyr. (BA21/22), R mid. O gyr. (BA19), cuneus/calcarine (BA17/18), R fusiform gyr. (BA19),<br>↓ F cort., inf. F gyr. (BA44), sup. and med. F gyr. (BA6/8/9/10/11/46), R orbitoF cort. (BA11), med. preF cort. (BA10), dorsolat. preF cort. (BA9/46), opercular (BA45), precentral cort., F-P cort., L P cort., inf. P gyr. (BA39/40/46), sup. P gyr. (BA7), supramarginal gyr. (BA40), T cort., sup., med. and inf. T cort. (BA20/21/37/38/42), R post. T cort., T pole (BA38), R Sylvian opercular, O cort., L mid. O gyr. (BA18), precuneus, angular gyr. (BA39), ant. cingulate cort. (BA24/32), post. cingulate cort. (BA23/24), thalamus, insula, nucleus caudatus, ventral striatum, putamen, basal ganglia, R pontomesencephalic tegmentum, midbrain, pons, brainstem, cerebellum. | 373-386                          |
|                                      | B1 | REM                     | = (G)<br>+ 41.7 (GM)<br>⇕= (MCA*)                                             | = (G)<br>+ 26.0 (GM)<br>(8.00 → 44.0)<br>⇕= (MCA*)                             | ⇕                             | - 5.68 → + 8.50                                                              | ↑ Precentral gyr., caudal orbitoF cort., med. preF cort., R post. P operculum (BA40), T cort., O cort., visual associative cort., entorhinal cort., ant. cingulate cort. (BA24/32), caudate, amygdala, thalamus, parahippocampal gyr., hippocampus, fusiform gyr. (BA19/37), dorsal mesencephalon, pontine tegmentum, midbrain, vermis cerebellum.<br>↓ Dorsolat. preF cort. (BA8/9/10/11/46), lat. orbitoF cort. (BA11), opercular (BA45), inf. F cort., inf. mesial F cort., lat. F cort., P cort. (BA40), angular gyr. (BA39), supramarginal gyr. (BA40), precuneus, post. cingulate cort. (BA23/31), post. insula, anterior hypothalamus and preoptic area, caudate, pons, cerebellum.                                                                                                                                                                                              | 373-376,<br>382-385,<br>387, 388 |
|                                      | C2 | Waking up               | ↓ (G)<br>- 11.7 (GM)                                                          | - 17.5 (G)<br>- 13.5 (GM)                                                      | ⇕                             | - 3.51 → + 4.42                                                              | ↑ Anterior hypothalamus and preoptic area, caudate, pons, cerebellum.<br>↓ Dorsolat. preF cort. (BA9/46), sup. T gyr. (BA22), inf. T gyr. (BA19/37), mid. T cort. (BA21), lat. O cort. (BA18/19), angular gyr. (BA39), striate (BA17), hippocampus.                                                                                                                                                                                                                                                                                                                                                                                                                                                                                                                                                                                                                                     | 372-376,<br>381-383              |
|                                      | C2 | Awakened <sub>ST2</sub> | + 5.70 (G)                                                                    | + 14.3 (G)                                                                     | ↑                             | ↑                                                                            | ↑ Orbital operculum (BA47), dorsal operculum (BA45), lat. and caudal orbital cort. (BA25/46), med. preF cort. (BA9), ant. cingulate cort. (BA24/32), ant. insula, dorsomedial thalamus, caudate, brainstem, midbrain reticular formation, cerebellum.                                                                                                                                                                                                                                                                                                                                                                                                                                                                                                                                                                                                                                   | 389                              |
| Drowsiness / sleepiness <sup>F</sup> | C4 |                         |                                                                               | ⇕                                                                              | ⇕                             | ↑ R lat. O cort., precuneus, R insular cort., O pole.<br>↓ L precentral gyr. | 390                                                                                                                                                                                                                                                                                                                                                                                                                                                                                                                                                                                                                                                                                                                                                                                                                                                                                     |                                  |
| Open eyes <sup>G</sup>               | C1 |                         | + 1.10 (G)                                                                    | + 2.96 (G)                                                                     | + 9.60 → + 24.4 <sub>FL</sub> | + 20.4 → + 48.9 <sub>FL</sub>                                                | ↑ O lobe, visual cort., post. part primay visual cort., anterior part V1, association visual cort.                                                                                                                                                                                                                                                                                                                                                                                                                                                                                                                                                                                                                                                                                                                                                                                      | 391-395                          |
| Mental activity <sup>H</sup>         | C1 |                         | + 3.06 cm/s (MCA*)<br>(2.72 → 3.40)                                           | + 5.30 cm/s (MCA*)<br>(4.70 → 5.90)                                            | - → + 15.60                   | - → + 24.4                                                                   | ↑ L ant. sup. preF cort., mid. and post. sup. preF cort., R sup. polar, R inf. polar, ant. mid. F cort., ant. intermediate preF cort., L post. intermediate preF cort., R ant. inf. F cort., R mid. inf. F cort., sup. F gyr. (BA8/9/10/11), med. F gyr. (BA10/11), mid. F gyr. (BA6/8), precentral gyr. (BA6), L Broca, R supramarginal cort., precuneus (BA7), angular gyr., parahippocampal gyr. (BA19/35/36), R hippocampus.<br>↓ Inf. F gyr. (BA9/47), mid. F gyr. (BA8/11/46), sup. F gyr. (BA11), L precentral gyr. (BA4), L uncus (BA20), inf. T gyr. (BA20), R mid. T gyr. (BA39), sup. T gyr. (BA22/38), mid. O gyr. (BA18/19), L inf. O gyr. (BA18), L fusiform gyr. (BA36), insula, cerebellum.                                                                                                                                                                             | 396-398                          |
| Arousal <sup>I</sup>                 | C3 |                         | ↑* (MCA*)                                                                     | +2.0* (MCA*)                                                                   | + 1.03 → + 4.67               | + 1.30 → + 6.03                                                              | ↑ F area, inf. F gyr. (BA45), R insula (BA13).                                                                                                                                                                                                                                                                                                                                                                                                                                                                                                                                                                                                                                                                                                                                                                                                                                          | 195, 399-<br>403                 |

#### **Additional information table 4**

##### **A – Stress**

- An **inverted U effect** caused by stress on cerebral perfusion is plausible, as individual differences have been reported.<sup>404</sup>
- The effects of stress on cerebral perfusion have been reported to be sustained for about 10 minutes after the ending of the stressful task.<sup>327</sup>
- A positive association between the **subjects stress rating** and cerebral perfusion in the ventrorostral prefrontal cortex and left insula/putamen has been reported.<sup>327</sup>

##### **B - Anxiety**

- The reported dissimilar effects of low versus high anxiety indicates an **inverted U effect** of anxiety on cerebral perfusion.<sup>335</sup>
- Regionally different perfusion patterns have been reported for both **state and trait** anxiety.<sup>329,330</sup>

##### **C – Yoga/meditation**

- The regions of which cerebral perfusion is affected by meditation, depend on the **method** of meditation.<sup>339</sup>
- During a meditation exercise, an association between the changes of cerebral perfusion and the **depth of meditation** has been reported.<sup>339</sup>

##### **D – Cognitive capacity**

- The magnitude of perfusion changes and the affected regions caused by a long-term cognitive training have been reported to depend on the **type of training**.<sup>362, 363</sup>

##### **E – Sleep**

- The effects of sleep on cerebral perfusion and the affected regions have been reported to depend on the **sleep stage** and the **sleep cycle**.<sup>383</sup> During **NREM** sleep, perfusion appears to progressively decrease through the deepening of NREM stages.<sup>372, 373, 376, 383</sup> During **REM** sleep, cerebral perfusion normalizes up to the pre-sleep baseline perfusion level and even higher, depending on sleep cycle.<sup>373, 383, 385</sup>
- The effects of **falling asleep and waking up** on cerebral perfusion have been reported to be measurable after 6-20 seconds after the transition of theta to alpha wave rhythm.<sup>372</sup>
- The decreasing effect of **spontaneously awakening** on cerebral perfusion has also been reported during night-time spontaneous awakening. This effect has been reported to last even more than 30 minutes after waking up, depending on the subject.<sup>373, 383</sup>

##### **F – Drowsiness/sleepiness**

- No associations between cerebral perfusion and **subjective sleepiness** have been reported. Some small positive and negative associations between regional perfusion and **drowsiness** have been reported, both in rested as in sleep restricted subjects.<sup>390</sup>

##### **G – Open eyes**

- The effects of opening the eyes during the perfusion scan has been reported to depend on **the level of light** in the scanner and/or scanner room and a possible visual stimulation such as a flickering light or a video.<sup>391-395</sup>

##### **H – Mental activity**

- The redistribution in regional perfusion caused by thinking has been reported to depend on the **type of the task**: visual, verbal, route finding, thinking about past or near future.<sup>396-398</sup>

##### **I – Arousal**

- The magnitude of perfusion change induced by arousal has been reported to depend on the **type of task**.<sup>405</sup>
- An association between the change in perfusion and the **task outcome parameters** (e.g. hit rates, reaction time,...) has been reported. After a couple of minutes, perfusion has been reported to normalize and even decrease under the baseline level due to less concentration during the completion of the task.<sup>400</sup>

Supplementary table 5. Caffeine and recreational drugs group of perfusion-modifying factors sorted according to the relevance of the effect in the field of neuroimaging. Absolute values correspond to ml/100g/min, except if stated otherwise; relative values correspond to a percentage (%).

| Factor                          | Cat. | Subcategory                                      | Global effect                                                                                        |                                                                                                       | Regional effect        |              | Ref                                                                                                                                                                                                                                                                                                                                                                                                                                                                                   |                    |
|---------------------------------|------|--------------------------------------------------|------------------------------------------------------------------------------------------------------|-------------------------------------------------------------------------------------------------------|------------------------|--------------|---------------------------------------------------------------------------------------------------------------------------------------------------------------------------------------------------------------------------------------------------------------------------------------------------------------------------------------------------------------------------------------------------------------------------------------------------------------------------------------|--------------------|
|                                 |      |                                                  | Absolute (ml/100g/min)                                                                               | Relative (%)                                                                                          | Absolute (ml/100g/min) | Relative (%) |                                                                                                                                                                                                                                                                                                                                                                                                                                                                                       | Regions            |
| Caffeine <sup>A</sup>           | A2   | Acute <sup>z</sup>                               | -2.75 (G)<br>(- 2.40 → - 3.10)<br>- 11.9 (GM)<br>(- 7.52 → - 21)<br>- 9.75 (WM)<br>(- 7.00 → - 12.5) | -10.2 (G)<br>(- 5.10 → - 18.9)<br>- 22.7 (GM)<br>(- 18.6 → - 27.0)<br>- 25.2 (WM)<br>(- 18.4 → - 32)  | - 14.5 → +             | - 19.8 → +   | ↑ F cort., preF cort., sup. F cort., P cort., L sup. P cort., P-T cort., T cort., O cort.<br>↓ F cort., mid. and inf. F gyr., preF cort., sup. F cort., P cort., sup. P cort., P-T cort., T cort., O cort., R mid. O gyr., visual cort., R cuneus, caudate, putamen, pallidus, thalamus, hippocampus, post. cingulum, precuneus.                                                                                                                                                      | 62, 406-420        |
|                                 | C3   | Chronic                                          | = (GM/WM/MCA*)<br>- 5.50 cm/s (MCA*)                                                                 | = (GM/WM/MCA*)<br>↓ (MCA*)                                                                            |                        |              |                                                                                                                                                                                                                                                                                                                                                                                                                                                                                       | 417-419            |
|                                 | C4   | Abstinence 24h<br>(compared to caffeine satiety) | ↑ (GM)<br>+ 6.05 cm/s (MCA*)                                                                         | ↑ (GM)<br>+ 9.40 (MCA*)                                                                               |                        |              |                                                                                                                                                                                                                                                                                                                                                                                                                                                                                       | 415-417            |
|                                 | C4   | Abstinence 14d                                   | = (MCA*)                                                                                             | = (MCA*)                                                                                              |                        |              |                                                                                                                                                                                                                                                                                                                                                                                                                                                                                       | 417                |
| Energy drink                    | C4   | Acute                                            | - 7.90 cm/s (MCA*)<br>(- 7.40 → - 9.0)                                                               | - 11.7 (MCA*)<br>(- 11.3 → - 12.1)                                                                    |                        |              |                                                                                                                                                                                                                                                                                                                                                                                                                                                                                       | 421-423            |
| Nicotine / Smoking <sup>B</sup> | B2   | Acute <sup>B</sup>                               | + 9.0 (G) (!)<br>- 10.4 (G) (!)<br>(- 7.75 → - 13.0)<br>= (G/GM) (!)<br>+ 5.00 (GM)<br>(4.00 → 6.00) | + 25.0 (G) (!)<br>- 17.6 (G) (!)<br>(- 13.2 → - 22.0)<br>= (G/GM) (!)<br>+ 10.2 (GM)<br>(8.20 → 12.2) | ↕                      | ↕            | ↑ R inf. F cort., agranular reg. of the orbitoF cort., R mid. F cort., R P cort., R sup. T cort., O cort. (BA17/18), primary visual cort., R fusiform gyr., R hippocampus thalamus, subgenual and L dorsal ant. cingulate cort., nucleus accumbens, pons, cerebellum.<br>↓ OrbitoF cort., R P cort., L P operculum, L T cort., R fusiform gyr., O cort., bil hippocampus, L parahippocampal gyr., nucleus accumbens, ventral basal ganglia, R amygdala, L dorsal ant. cingulate cort. | 424-435            |
|                                 | B2   | Chronic                                          | - 6.37 (GM)<br>(- 1.50 → - 11.1)<br>= (GM)                                                           | - 9.16 (GM)<br>(- 2.0 → - 15.5)<br>= (GM)                                                             | ↕                      | ↕            | ↑ Ventral striatum.<br>↓ R F pole, R pars orbitalis, lat. and med. orbitoF cort., P cort., inf. P lobule, sup. T gyr., O cort., R supramarginal gyr., R isthmus of cingulate cort., post. cingulate cort.                                                                                                                                                                                                                                                                             | 19, 63, 436-444    |
|                                 | B2   | Abstinence 24h<br>(compared to smoking satiety)  | = (G)<br>- 10.0 (GM)                                                                                 | = (G)<br>- 16.9 (GM)                                                                                  | - 6.70 → + 14.0        | ↕            | ↑ Med. orbitoF cort., L orbitoF cort., dorsolat. preF cort., ant. cingulate cort. (inf. part), ventral striatum.<br>↓ R preF cort.                                                                                                                                                                                                                                                                                                                                                    | 434, 435, 445, 446 |
|                                 | C2   | Former smoker<br>(compared to control)           | - 12.0 (GM)<br>(- 2.10 → - 24.9)                                                                     | - 16.8 (GM)<br>(- 2.80 → - 34.8)                                                                      | ↓                      | ↓            | ↓ P cort., O cort.                                                                                                                                                                                                                                                                                                                                                                                                                                                                    | 19, 439-442        |
|                                 | C4   | Acute NRT gum                                    |                                                                                                      |                                                                                                       | ↑                      | ↑            | ↑ Ventral striatum.<br>= Med. F GM, thalamus.                                                                                                                                                                                                                                                                                                                                                                                                                                         | 435                |

|                                   |    |                                                  |                                                                          |                                                                 |                 |                 |                                                                                                                                                                                                                                                                                                                                                                                                                                                                                                                                                                                                                                            |                      |
|-----------------------------------|----|--------------------------------------------------|--------------------------------------------------------------------------|-----------------------------------------------------------------|-----------------|-----------------|--------------------------------------------------------------------------------------------------------------------------------------------------------------------------------------------------------------------------------------------------------------------------------------------------------------------------------------------------------------------------------------------------------------------------------------------------------------------------------------------------------------------------------------------------------------------------------------------------------------------------------------------|----------------------|
| Alcohol <sup>C</sup>              | B1 | Acute                                            | + 8.58 (G)<br>= (G/WM)<br>(5 → 11.9)<br>- 9.84 (G)<br>↑ (GM)             | + 12.7 (G)<br>(9.26 → 16.5)<br>= (G/WM)<br>- 6.00 (G)<br>↑ (GM) | - 25.5 → + 14.2 | - 36.6 → + 20.4 | Regional redistribution among almost all regions:<br>↑ Pref cort., <u>sup. F cort.</u> , inf. F gyr. (BA47), med. G gyr. (BA6/10/25), caudal mid. F gyr., R central cort., sup. F cort. (BA6), precentral gyr. (BA4), L R P cort., R inf. P lobule (BA40), F-T cort., T cort., sup. T gyr. (BA13), mid. T gyr. (BA21), L inf. T cort. (BA20/37), R subcallosal gyr. (BA47), O cort., R supramarginal gyr. (BA40), post. reg., R ant. reg., ant. cingulate cort. (BA32/33), L cingulate gyr. (BA31), L parahippocampal gyr. (BA30), R putamen, thalamus, insula (BA13), cerebellum.<br>↓ R <u>sup. F cort.</u> , L central cort., L P cort. | 447-459              |
|                                   | B2 | Chronic                                          | - 2.43 (G)<br>(- 1.85 → - 3.00)<br>+ 3.30 (G)<br>(1.80 → 4.80)<br>= (GM) | - 7.46 (G)<br>+ 4.48 (G)<br>= (GM)                              | - → + 9.83      | - → + 17.4      | ↑ Mid. F cort. extending to inf. and sup. F gyr., orbitoF cort., pars opercularis, dors. pref cort., med. F gyr. extending to inf. and mid. F gyr. and ant. cingulate cort., paracentral cort., pre- and postcentral gyr. extending to inf. and mid. F gyr., <u>inf. P lobule</u> , sup. T cort., L T-O reg., O pole, (pre)uncus, hippocampus, ant. cingulate cort., post. cingulate cort., cingulate gyr., caudate, putamen, thalamus, insula.<br>↓ Ant. F cort., mid. F reg. (BA9), post. F cort., P cort., <u>inf. P lobule</u> (BA40), ant. T cort., post. T cort., O cort., L precuneus (BA7), R cingulate cort. (BA32).              | 63, 460-468          |
|                                   | C1 | Abstinence 24h<br>(compared to drinking satiety) | - 18.4 (G)                                                               | - 27.3 (G)                                                      |                 |                 |                                                                                                                                                                                                                                                                                                                                                                                                                                                                                                                                                                                                                                            | 448, 469             |
|                                   | B1 | Abstinence LT<br>(compared to drinking satiety)  | ↕ (G)<br>+ 14.0 (GM)<br>= (WM)                                           | ↕ (G)<br>+ 20.3 (GM)<br>= (WM)                                  | - → + 26.0      | - → + 33.8      | ↑ Pref cort., premotor cort., sensorymotor cort., inf. and med. P cort., T-basal reg., sup., mid., med. and inf. T reg., T-O reg., T-P reg., ant. and post. cingulate cort., calcarine cort., thalamus, striatum, cerebellum.<br>↓ orbitoF cort., pref cort., ant. F reg., mid. F reg.                                                                                                                                                                                                                                                                                                                                                     | 462, 463,<br>470-475 |
| Recreational Opioids <sup>D</sup> | B4 | Acute                                            | ↑ (WM)                                                                   | ↑ (WM)                                                          | ↕               | ↕               | ↑ L <u>precentral gyr.</u> , L inf. and mid. F cort., F pole, ant. T lobes, R operculum, <u>precuneus, ant. cingulate cort.</u> , thalamus, amygdala, brainstem, cerebellum.<br>↓ <u>Precentral gyr.</u> , med. F cort., F-P reg., angular cort., T-O reg., inf. T gyr., fusiform gyr., <u>precuneus, ant. cingulate cort., putamen, insula.</u>                                                                                                                                                                                                                                                                                           | 476-481              |
|                                   | C4 | Chronic                                          | = (G)<br>↑ (MCA*)                                                        | = (G)<br>↑ (MCA*)                                               | ↕               | ↕               | ↑ Cranial sup. F cort., L mesioF cort., sup. central cort., L inf. central cort., sup. P cort., L inf. P cort., L sup. T cort., thalamus,<br>↓ F cort., caudal sup. F cort., R mesioF cort., R inf. P cort., L P cort., sup. O cort., R sup. T cort., R inf. T cort., inf. O cort., basal ganglia, thalamus, hippocampus.                                                                                                                                                                                                                                                                                                                  | 482, 483             |
|                                   | B4 | Abstinence<br>(compared to using)                | ↓ (G)<br>= (G)                                                           | ↓ (G)<br>= (G)                                                  | ↕               | ↕               | ↑ Small regions in F, T, O lobes and apex reg., thalamus.<br>↓ F cort., orbitoF cort., P cort., T cort., cerebellum.                                                                                                                                                                                                                                                                                                                                                                                                                                                                                                                       | 483-489              |
| Amphetamines <sup>E</sup>         | A2 | Acute                                            | = (GM)                                                                   | = (GM)                                                          | - 17.0 → +      | - 20.0 → +      | ↑ L mesial pref zones (BA8/10), med. F cort., inf. orbitoF cort. (BA11), R sup. F gyr., P lob (BA40), paracentral lobule (BA31/40), transverse T gyr., L parahippocampal gyr., <u>ant. and post. cingulate cort.</u> , ventral tegmentum, amygdala, putamen, globus pallidus, nucleus caudatus, thalamus, brainstem pons, cerebellum.<br>↓ F reg., pref cort., motor cort. (BA6), posterolat. T lobe, R lat. T lobe, Sylvian fissure, O reg., visual cort., fusiform gyr., <u>cingulate cort., basal ganglia, insular cort.</u>                                                                                                            | 490-495              |
|                                   | C4 | Chronic                                          | ↓ (BA*/ICA*)                                                             | ↓ (BA*/ICA*)                                                    | ↓               | ↓               | ↓ Small local defects.                                                                                                                                                                                                                                                                                                                                                                                                                                                                                                                                                                                                                     | 496, 497             |
|                                   | A4 | Abstinence<br>(compared to control)              | ↓ (G)                                                                    | ↓ (G)                                                           | ↕               | ↕               | ↑ L T-P WM, L O reg., <u>R O cort., midline structure.</u><br>↓ Mesiodorsal pref cort., R lat. P reg., <u>R O cort., midline structure,</u> ant. cingulate cort., putamen, insular cort., striatum, thalamus, cingulum, pons.                                                                                                                                                                                                                                                                                                                                                                                                              | 498-501              |
| Cocaine <sup>F</sup>              | B1 | Acute                                            | - 10.0 (G)<br>↓ (GM/WM)<br>↑ (GM)                                        | - 28.6 (G)<br>- 14.1 (GM)<br>- 3.30 (WM)                        | ↕               | -36.6 → +28.1   | ↑ F cort., <u>sup. and inf. F cort., central cort., P cort., anteromesial T cort., R nucleus caudatus, ant. and post. cingulate cort., insula, amygdala, L post. hippocampus, midlin reg. between caudate heads, superior to BA25, L cerebellum.</u><br>↓ R <u>inf. F cort., sup. F cort.</u> , R lat. orbitoF cort., F lobe, pref cort., precentral cort., P and T lobe, O cort., limbic lobe, sublobar reg., R post. hippocampus, R caudate head, L nucleus caudate, putamen, globus pallidus, thalamus, <u>inf. and ant. cingulate cort., brainstem, midbrain, cerebellum.</u>                                                          | 502-508              |
|                                   | B4 | Chronic                                          | - 5.50 cm/s (MCA*)                                                       | - 9.0 (MCA*)                                                    | ↓               | ↓               | ↓ Pref cort., ant. brain structures, F cort., caudolat. pref cort., anteroF cort., lat. F cort., P cort., inf. P cort., T cort., sup. T cort., L mid. T gyr. O cort., basal ganglia, thalamus, cerebellum.                                                                                                                                                                                                                                                                                                                                                                                                                                 | 508-516              |
|                                   | C4 | Abstinence<br>(compared to control)              | ↓ (G)                                                                    | ↓ (G)                                                           | ↕               | ↕               | ↑ F cort., <u>P cort., post. cingulate gyr.</u><br>↓ Pref cort., orbitoF cort., lat. F cort., sup. post. F cort., sup. F gyr., R precentral gyr., <u>P cort., T cort., anterolat. T cort., O cort., mid. F cingulate gyr., R sup. cingulate gyr., ant. cingulate gyr., cerebellum</u>                                                                                                                                                                                                                                                                                                                                                      | 487, 498,<br>516-526 |
|                                   | C2 | Former user 6mo                                  | - 6.70 (G)                                                               | - 12.3 (G)                                                      | ↓               | ↓               | ↓ F reg., post. P areas, L T cort., R post. T cort.                                                                                                                                                                                                                                                                                                                                                                                                                                                                                                                                                                                        | 527                  |
|                                   | C4 | Former user >1yr                                 | = (G)                                                                    | = (G)                                                           | ↕               | ↕               | ↑ F WM, T-P WM, globus pallidus.<br>↓ T GM, putamen.                                                                                                                                                                                                                                                                                                                                                                                                                                                                                                                                                                                       | 528                  |

|                                     |    |                                   |                              |                              |                 |                 |                                                                                                                                                                                                                                                                                                    |                 |
|-------------------------------------|----|-----------------------------------|------------------------------|------------------------------|-----------------|-----------------|----------------------------------------------------------------------------------------------------------------------------------------------------------------------------------------------------------------------------------------------------------------------------------------------------|-----------------|
| Cannabis <sup>G</sup>               | A2 | Acute <sup>z</sup>                | + 5.29 (GM)<br>(2.51 → 7.51) | + 8.14 (GM)<br>(3.29 → 13.8) | - → + 10.8      | - → + 11.2      | ↑ F cort., P cort., T cort., insula, cingulate cort., basal ganglia, thalamus, amygdala, hippocampus, L cerebellum.<br>↓ R postcentral gyr., O gyr.                                                                                                                                                | 529-534         |
|                                     | B1 | Chronic                           | = (G)<br>↓ (G)<br>↑ (MCA*)   | = (G)<br>↓ (G)<br>↑ (MCA*)   | - 18.2 → + 7.20 | - 29.7 → + 12.6 | ↑ R ant. cingulate cort., R precuneus.<br>↓ Ventral pref cort. (BA11), med. F gyr., L sup. T gyr., L mid. T gyr., L supramarginal gyr., L insula, post. cerebellum, vermis cerebellum.                                                                                                             | 535-539         |
|                                     | B4 | Abstinence<br>(compared to using) | = (G/GM)<br>↓ (MCA*)         | = (G/GM)<br>↓ (MCA*)         | ↓               | ↓               | ↓ Pref cort., sup. F cort., F-T cort., central cort., P-T cort.                                                                                                                                                                                                                                    | 535-538,<br>540 |
| Solvents and inhalants <sup>H</sup> | C1 | Acute                             | + 14.2 (GM)                  | + 20.9 (GM)                  | + 12.7 → + 15.9 | + 17.8 → +24.7  | ↑ F reg., central reg., P reg., T reg., O reg.                                                                                                                                                                                                                                                     | 541             |
|                                     | B4 | Chronic                           | = (G/GM)<br>↓ (GM)           | = (G/GM)<br>↓ (GM)           | ↕               | ↕               | ↑ L O reg.<br>↓ Pref cort., T cort., F cort., thalamus.                                                                                                                                                                                                                                            | 541-546         |
| MDMA <sup>I</sup>                   | C3 | 1.5 – 3w<br>after acute intake    | = (G)                        | = (G)                        | - 4.20 → -5.30  | - 8.37 → -10.0  | ↓ Dorsal lat. F cort., somatosensory cort., sup. P cort., visual cort., caudate, thalamus, R hippocampus, R amygdala.                                                                                                                                                                              | 547, 548        |
|                                     | C3 | Abstinence                        | -1.0 (G)                     | -2.30 (G)                    | =               | =               |                                                                                                                                                                                                                                                                                                    | 547             |
| LSD                                 | C4 | Acute                             | = (G)                        | = (G)                        | ↑               | ↑               | ↑ Visual cort.                                                                                                                                                                                                                                                                                     | 549, 550        |
| Psilocybin <sup>J</sup>             | C4 | Acute                             |                              |                              | ↓               | ↓               | ↓ Med. pref cort., lat. orbitof cort., F operculum, precentral gyr., sup. F gyr., mid. F gyr., inf. F gyr., retrosplenial cort., precuneus, angular gyr., supramarginal gyr., thalamus, putamen, hypothalamus, rostral and dorsal ant. cingulate cort., post. cingulate cort., paracingulate cort. | 551             |

## Additional information table 5

### **A – Caffeine**

- The effects of a caffeine drink have been reported to depend on the **habitual caffeine intake**: the effects are greater in subjects with a lower daily caffeine intake,<sup>409, 415, 418</sup> and encounter a strong dependency on the pre-caffeine perfusion state.<sup>407, 415</sup>
- An association between the **salivary caffeine content** and cerebral perfusion has not been reported.<sup>415</sup>
- The reported decrease in cerebral perfusion has been reported to last until 45 to 75 min after the caffeine intake.<sup>407</sup>
- As suspected, **caffeinated tea and soft drinks** have been reported to exert similar effects on cerebral perfusion, which are not reported in decaffeinated coffee.<sup>410, 412</sup>
- The effects of **chronic caffeine** use on cerebral perfusion are not well documented, but it is suggested that cerebral perfusion is normalized in chronic caffeine drinkers due to a downregulation of the vascular adenosine receptors.<sup>415</sup>

### **B – Nicotine/smoking**

- Both an increased, decreased and normal cerebral perfusion after the use of one nicotine containing product has been reported, even within the same study using the subject's favorite cigarette brand. This might be explained by the variability of the smokers' cerebral vascular reactivity.<sup>429</sup>
- Some negative associations between regional cerebral perfusion and the **nicotine plasma concentration** have been reported, but not with cotinine nor the Fagerström dependence score.<sup>429-431</sup>
- The effects of the **second cigarette of the day and denicotinized cigarettes** on regional perfusion have been reported to be lower than the effect of the first standard cigarette.<sup>425, 432, 433</sup>
- The acute effects on regional perfusion have been reported to normalize about 15 minutes after smoking the cigarette for most, but not all regions.<sup>430, 431</sup>
- The magnitude of the decrease in cerebral perfusion in chronic nicotine users has been reported to depend on the **daily nicotine intake**,<sup>436</sup> and to depend on the **age of the user**.<sup>437</sup>
- A negative association between cerebral perfusion and the **numbers of years smoked** has been reported, but not between cerebral perfusion and pack year, Fagerström scores nor the interval since smoking the last cigarette.<sup>444</sup>
- A positive association between cerebral perfusion and the **abstinence induced craving score** has been reported, as well as a negative association between cerebral blood flow and the Minnesota withdrawal score.<sup>435, 445</sup>
- It has been reported that the effects of long term nicotine withdrawal on cerebral perfusion are caused by **non-nicotine related components of smoking**, such as the use of denicotinized cigarettes.<sup>443</sup>
- A linear association between the change of the global perfusion during the withdrawal period and the **duration of the withdrawal** period has been observed.<sup>439</sup>

### **C – Alcohol**

- An **interaction between the acute alcohol intake and the gender** has been reported as alcohol appears to non-significantly increase regional perfusion in female, but decrease regional perfusion in men.<sup>457</sup> Another paper however reported a bigger effect of alcohol on global perfusion in women compared to men.<sup>447</sup>
- A positive association between cerebral perfusion and the **acetate level** and the **blood alcohol concentration (BAC)** have been reported.<sup>453</sup>
- The short-term effects of alcohol have been reported to be **dose-dependent**.<sup>451, 458</sup>
- No associations between the cerebral blood flow and the **duration of alcoholism**, the total alcohol dose of the previous year, the total lifetime alcohol consumption, the days since last heavy drinking, sobriety, drinking severity measures nor the withdrawal score have been reported.<sup>463, 464, 466, 471, 472, 475</sup> Negative associations between cerebral perfusion and the alcohol intake during the previous month and the weekly alcohol consumption rate has been reported.<sup>464, 465</sup>
- The acute effects of alcohol are reported to last at least **2 hours** after consumption.<sup>447</sup>

### **D – Recreational opioids**

- The redistribution in the regional cerebral perfusion after the acute intake of recreational opioids has been reported to be related to the time passed after the intake, more specifically to the experience of **“rush”** versus **“euphoria”**.<sup>480</sup>
- No associations between the cerebral perfusion and the **type of opioid** nor the **age** of the individual have been noted, but a positive association between cerebral perfusion and the **duration of abstinence** and the craving scores have been reported.<sup>482, 552</sup>
- The effects of abstinence of recreational opioids on cerebral perfusion have been reported to be subject to withdrawal effects, but mainly induced by the use of anti-addiction medication (e.g. Buprenorphine) and appear to be dose-related.<sup>487, 489</sup>

### **E – Amphetamines**

- The effects of chronic amphetamine use were not reported in every study subject.
- No association between cerebral perfusion and the length of abstinence, the total cumulative amphetamine dose, the weeks since last amphetamine use, the time of first use nor the duration of dependency.<sup>496, 499-501</sup> However, one study reported a negative association between cerebral perfusion and the duration of amphetamine use.<sup>500</sup>

### **F – Cocaine**

- Only the effects on regional perfusion after an acute intake of cocaine have been reported to be **dose-dependent**.<sup>502</sup>
- The effects on regional perfusion have been reported to be normalized about 40 minutes after cocaine intake.<sup>502</sup>
- Different short-term effects of cocaine on cerebral perfusion have been reported in **non-users versus habitual cocaine users**.<sup>508</sup>
- No associations between cerebral perfusion and the **lifetime usage of cocaine**, the lifetime number of days using cocaine and the number of days using cocaine during the last 90 days, the age of first use, and the total years of cocaine use have been reported.<sup>498, 508, 509</sup>
- Some studies reported an **interaction between gender and chronic and abstinence effects** of cocaine in their effect on regional perfusion.<sup>513, 518, 525, 528</sup>

### **G – Cannabis**

- The maximum acute effects of cannabis intake on cerebral perfusion has been reported to occur after 30 minutes. Those changes in perfusion have been reported to be normalized after 60 to 120 minutes.<sup>529, 532</sup>
- The effects of the intake of cannabis on cerebral perfusion has been reported to be **dose dependent**, but no association between the effects on cerebral perfusion and the **plasma levels of tetrahydrocannabinol** has been found.<sup>529, 532</sup>
- No associations between cerebral perfusion and the weekly number of joints, the days per month using cannabis, the days since last cannabis use nor the duration of cannabis use have been reported.<sup>536, 538-540, 553</sup>

### **H – Solvents and inhalants**

- The effects of inhalants and solvents on cerebral perfusion are mostly investigated in **professional painters**.
- An association between the effects of chronic exposure to inhalants and/or solvents on cerebral perfusion and the dose and the length of exposure has been reported.<sup>542, 543</sup>

### **I – MDMA**

- The effects of an acute intake of MDMA on cerebral perfusion has been reported to be **dose related**.<sup>547</sup>

### **J – Psilocybin**

- A negative association between the regional perfusion and the **intensity of the subjective effects** of psilocybin intake has been reported.<sup>551</sup>

## References

1. Tachibana H, Meyer JS, Okayasu H, Kandula P. Changing topographic patterns of human cerebral blood-flow with age measured by xenon CT. *Am. J. Roentgenol.* 1984; 142(5): 1027-1034.
2. Pagani M, Salmaso D, Jonsson C, Hatherly R, Jacobsson H, Larsson SA *et al.* Regional cerebral blood flow as assessed by principal component analysis and Tc-99m-HMPAO SPET in healthy subjects at rest: normal distribution and effect of age and gender. *Eur. J. Nucl. Med.* 2002; 29(1): 67-75.
3. Stoquart-ElSankari S, Baledent O, Gondry-Jouet C, Makki M, Godefroy O, Meyer ME. Aging effects on cerebral blood and cerebrospinal fluid flows. *J. Cereb. Blood Flow Metab.* 2007; 27(9): 1563-1572.
4. Pantano P, Baron JC, Lebrungrandie P, Duquesnoy N, Bousser MG, Comar D. Regional cerebral blood-flow and oxygen-consumption in human aging. *Stroke* 1984; 15(4): 635-641.
5. Hagstadius S, Risberg J. Regional cerebral blood-flow characteristics and variations with age in resting normal subjects. *Brain Cogn.* 1989; 10(1): 28-43.
6. Leenders KL, Perani D, Lammertsma AA, Heather JD, Buckingham P, Healy MJR *et al.* Cerebral blood-flow, blood-volume and oxygen utilization - normal values and effect of age. *Brain* 1990; 113: 27-47.
7. Martin AJ, Friston KJ, Colebatch JG, Frackowiak RSJ. Decreases in regional cerebral blood-flow with normal aging. *J. Cereb. Blood Flow Metab.* 1991; 11(4): 684-689.
8. Marchal G, Rioux P, Pettitaboue MC, Sette G, Traverso JM, Lepoec C *et al.* Regional cerebral oxygen-consumption, blood-flow, and blood-volume in healthy-human aging. *Arch. Neurol.* 1992; 49(10): 1013-1020.
9. Schultz SK, O'Leary DS, Ponto LLB, Watkins GL, Hichwa RD, Andreasen NC. Age-related changes in regional cerebral blood flow among young to midlife adults. *Neuroreport* 1999; 10(12): 2493-2496.
10. Bentourkia M, Bol A, Ivanoiu A, Labar D, Sibomana M, Coppens A *et al.* Comparison of regional cerebral blood flow and glucose metabolism in the normal brain: effect of aging. *J. Neurol. Sci.* 2000; 181(1-2): 19-28.
11. Meltzer CC, Cantwell MN, Greer PJ, Ben-Eliezer D, Smith G, Frank G *et al.* Does cerebral blood flow decline in healthy aging? A PET study with partial-volume correction. *Journal of Nuclear Medicine* 2000; 41(11): 1842-1848.
12. Takahashi K, Yamaguchi S, Kobayashi S, Yamamoto Y. Effects of aging on regional cerebral blood flow assessed by using technetium Tc 99m hexamethylpropyleneamine oxime single-photon emission tomography with 3D stereotactic surface projection analysis. *Am. J. Neuroradiol.* 2005; 26(8): 2005-2009.
13. Ances BM, Liang CL, Leontiev O, Perthen JE, Fleisher AS, Lansing AE *et al.* Effects of Aging on Cerebral Blood Flow, Oxygen Metabolism, and Blood Oxygenation Level Dependent Responses to Visual Stimulation. *Hum. Brain Mapp.* 2009; 30(4): 1120-1132.
14. Preibisch C, Sorg C, Forschler A, Grimmer T, Sax I, Wohlschlagel AM *et al.* Age-Related Cerebral Perfusion Changes in the Parietal and Temporal Lobes Measured by Pulsed Arterial Spin Labeling. *J. Magn. Reson. Imaging* 2011; 34(6): 1295-1302.
15. Moller WD, Wolschendorf K. Dependence of cerebral blood-flow on age. *Eur. Neurol.* 1978; 17(5): 276-279.
16. Swartz JR, Lesser IM, Boone KB, Miller BL, Mena I. Cerebral blood-flow changes in normal aging - SPECT measurements. *Int. J. Geriatr. Psychiatr.* 1995; 10(6): 437-446.
17. Itoh M, Hatazawa J, Miyazawa H, Matsui H, Meguro K, Yanai K *et al.* Stability of cerebral blood-flow and oxygen-metabolism during normal aging. *Gerontology* 1990; 36(1): 43-48.
18. Dastur DK. Cerebral blood-flow and metabolism in normal-human aging, pathological aging, and senile dementia. *J. Cereb. Blood Flow Metab.* 1985; 5(1): 1-9.
19. Launer LJ, Lewis CE, Schreiner PJ, Sidney S, Battapady H, Jacobs DR *et al.* Vascular Factors and Multiple Measures of Early Brain Health: CARDIA Brain MRI Study. *PLoS one* 2015; 10(3).
20. Oudegeest-Sander MH, van Beek A, Abbink K, Rikkert M, Hopman MTE, Claassen J. Assessment of dynamic cerebral autoregulation and cerebrovascular CO<sub>2</sub> reactivity in ageing by measurements of cerebral blood flow and cortical oxygenation. *Exp. Physiol.* 2014; 99(3): 586-598.
21. Sorond FA, Schnyer DM, Serrador JM, Milberg WP, Lipsitz LA. Cerebral blood flow regulation during cognitive tasks: Effects of healthy aging. *Cortex* 2008; 44(2): 179-184.
22. Pase MP, Grima NA, Stough C, Scholey A, Pipingas A. Association of pulsatile and mean cerebral blood flow velocity with age and neuropsychological performance. *Physiol. Behav.* 2014; 130: 23-27.



23. Ainslie PN, Cotter JD, George KP, Lucas S, Murrell C, Shave R *et al.* Elevation in cerebral blood flow velocity with aerobic fitness throughout healthy human ageing. *J. Physiol.-London* 2008; 586(16): 4005-4010.
24. Globus M, Melamed E. Progressive age-related decrease in regional cerebral blood-flow in healthy-subjects. *Isr. J. Med. Sci.* 1985; 21(8): 662-665.
25. Larsson A, Skoog I, Aevansson O, Arlig A, Jacobsson L, Larsson L *et al.* Regional cerebral blood flow in normal individuals aged 40, 75 and 88 years studied by Tc-99(m)-d,l-HMPAO SPET. *Nucl. Med. Commun.* 2001; 22(7): 741-746.
26. Hasan KM, Ali H, Shad MU. Atlas-based and DTI-guided quantification of human brain cerebral blood flow: Feasibility, quality assurance, spatial heterogeneity and age effects. *Magn. Reson. Imaging* 2013; 31(8): 1445-1452.
27. Catafau AM, Lomena FJ, Pavia J, Parellada E, Bernardo M, Setoain J *et al.* Regional cerebral blood flow pattern in normal young and aged volunteers: A Tc-99m-HMPAO SPET Study. *Eur. J. Nucl. Med.* 1996; 23(10): 1329-1337.
28. Warren LR, Butler RW, Katholi CR, Halsey JH, Jr. Age differences in cerebral blood flow during rest and during mental activation measurements with and without monetary incentive. *Journal of gerontology* 1985; 40(1): 53-9.
29. Asllani I, Habeck C, Borogovac A, Brown TR, Brickman AM, Stern Y. Separating function from structure in perfusion imaging of the aging brain. *Hum Brain Mapp* 2009; 30(9): 2927-35.
30. Liu YN, Zhu XP, Feinberg D, Guenther M, Gregori J, Weiner MW *et al.* Arterial spin labeling MRI study of age and gender effects on brain perfusion hemodynamics. *Magn. Reson. Med.* 2012; 68(3): 912-922.
31. Jones K, Johnson KA, Becker JA, Spiers PA, Albert MS, Holman BL. Use of singular value decomposition to characterize age and gender differences in SPECT cerebral perfusion. *Journal of Nuclear Medicine* 1998; 39(6): 965-973.
32. Bertsch K, Hagemann D, Hermes M, Walter C, Khan R, Naumann E. Resting cerebral blood flow, attention, and aging. *Brain Res.* 2009; 1267: 77-88.
33. Chen JJ, Rosas HD, Salat DH. Age-associated reductions in cerebral blood flow are independent from regional atrophy. *Neuroimage* 2011; 55(2): 468-478.
34. Parkes LM, Rashid W, Chard DT, Tofts PS. Normal cerebral perfusion measurements using arterial spin labeling: Reproducibility, stability, and age and gender effects. *Magn. Reson. Med.* 2004; 51(4): 736-743.
35. Melamed E, Lavy S, Bentin S, Cooper G, Rinot Y. Reduction in regional cerebral blood-flow during normal aging in man. *Stroke* 1980; 11(1): 31-35.
36. Shin WY, Horowitz S, Ragin A, Chen YF, Walker M, Carroll TJ. Quantitative cerebral perfusion using dynamic susceptibility contrast MRI: Evaluation of reproducibility and age- and gender-dependence with fully automatic image postprocessing algorithm. *Magn. Reson. Med.* 2007; 58(6): 1232-1241.
37. Gur RC, Gur RE, Obrist WD, Skolnick BE, Reivich M. Age and regional cerebral blood-flow at rest and during cognitive activity. *Archives of general psychiatry* 1987; 44(7): 617-621.
38. Buijs PC, Krabbe-Hartkamp MJ, Bakker CJG, de Lange EE, Ramos LMP, Breteler MMB *et al.* Effect of age on cerebral blood flow: Measurement with ungated two-dimensional phase-contrast MR angiography in 250 adults. *Radiology* 1998; 209(3): 667-674.
39. Krejza J, Mariak Z, Walecki J, Szydluk P, Lewko J, Ustymowicz A. Transcranial color Doppler sonography of basal cerebral arteries in 182 healthy subjects: Age and sex variability and normal reference values for blood flow parameters. *Am. J. Roentgenol.* 1999; 172(1): 213-218.
40. Vernooij MW, van der Lugt A, Ikram MA, Wielopolski PA, Vrooman HA, Hofman A *et al.* Total cerebral blood flow and total brain perfusion in the general population: The Rotterdam Scan Study. *J. Cereb. Blood Flow Metab.* 2008; 28(2): 412-419.
41. Rusinek H, Brys M, Glodzik L, Switalski R, Tsui WH, Haas F *et al.* Hippocampal blood flow in normal aging measured with arterial spin labeling at 3T. *Magnetic resonance in medicine : official journal of the Society of Magnetic Resonance in Medicine / Society of Magnetic Resonance in Medicine* 2011; 65(1): 128-37.
42. Amin-Hanjani S, Du XJ, Pandey DK, Thulborn KR, Charbel FT. Effect of age and vascular anatomy on blood flow in major cerebral vessels. *J. Cereb. Blood Flow Metab.* 2015; 35(2): 312-318.
43. Liu W, Lou X, Ma L. Use of 3D pseudo-continuous arterial spin labeling to characterize sex and age differences in cerebral blood flow. *Neuroradiology* 2016.
44. Demirkaya S, Uluc K, Bek S, Vural O. Normal blood flow velocities of basal cerebral arteries decrease with advancing age: A Transcranial Doppler sonography study. *Tohoku J. Exp. Med.* 2008; 214(2): 145-149.

45. Bangen KJ, Nation DA, Clark LR, Harmell AL, Wierenga CE, Dev SI *et al.* Interactive effects of vascular risk burden and advanced age on cerebral blood flow. *Front. Aging Neurosci.* 2014; 6.
46. Braz ID, Fluck D, Lip GY, Lundby C, Fisher JP. Impact of aerobic fitness on cerebral blood flow and cerebral vascular responsiveness to CO<sub>2</sub> in young and older men. *Scandinavian journal of medicine & science in sports* 2016.
47. Soni N, Jain A, Kumar S, Pandey CM, Awasthi A. Arterial spin labeling magnetic resonance perfusion study to evaluate the effects of age and gender on normal cerebral blood flow. *Neurology India* 2016; 64 Suppl: S32-8.
48. Wu C, Honarmand AR, Schnell S, Kuhn R, Schoeneman SE, Ansari SA *et al.* Age-Related Changes of Normal Cerebral and Cardiac Blood Flow in Children and Adults Aged 7 Months to 61 Years. *J. Am. Heart Assoc.* 2016; 5(1).
49. Barthel H, Wiener M, Dannenberg C, Bettin S, Sattler B, Knapp WH. Age-specific cerebral perfusion in 4- to 15-year-old children: a high-resolution brain SPET study using Tc-99m-ECD. *Eur. J. Nucl. Med.* 1997; 24(10): 1245-1252.
50. Biagi L, Abbruzzese A, Bianchi MC, Alsop DC, Del Guerra A, Tosetti M. Age dependence of cerebral perfusion assessed by magnetic resonance continuous arterial spin labeling. *Journal of magnetic resonance imaging : JMRI* 2007; 25(4): 696-702.
51. Brouwers P, Vriens EM, Musbach M, Wieneke GH, Vanhuffelen AC. Transcranial pulsed doppler measurements of blood-flow velocity in the middle cerebral-artery - reference values at rest and during hyperventilation in healthy-children and adolescents in relation to age and sex. *Ultrasound Med. Biol.* 1990; 16(1): 1-8.
52. Schoning M, Hartig B. Age dependence of total cerebral blood flow volume from childhood to adulthood. *J. Cereb. Blood Flow Metab.* 1996; 16(5): 827-833.
53. Horiuchi I, Sanada S, Ohtahara S. Developmental and physiologic changes in cerebral blood flow velocity. *Pediatr Res* 1993; 34(3): 385-8.
54. Hales PW, Kawadler JM, Aylett SE, Kirkham FJ, Clark CA. Arterial spin labeling characterization of cerebral perfusion during normal maturation from late childhood into adulthood: normal 'reference range' values and their use in clinical studies. *Journal of cerebral blood flow and metabolism : official journal of the International Society of Cerebral Blood Flow and Metabolism* 2014; 34(5): 776-84.
55. Taki Y, Hashizume H, Sassa Y, Takeuchi H, Wu K, Asano M *et al.* Correlation between gray matter density-adjusted brain perfusion and age using brain MR images of 202 healthy children. *Hum Brain Mapp* 2011; 32(11): 1973-85.
56. Satterthwaite TD, Shinohara RT, Wolf DH, Hopson RD, Elliott MA, Vandekar SN *et al.* Impact of puberty on the evolution of cerebral perfusion during adolescence. *Proceedings of the National Academy of Sciences of the United States of America* 2014; 111(23): 8643-8648.
57. Rogers RL, Meyer JS, Mortel KF. After reaching retirement age physical-activity sustains cerebral perfusion and cognition. *J. Am. Geriatr. Soc.* 1990; 38(2): 123-128.
58. McAlpine CJ, Rowan JO, Matheson MS, Patterson J. Cerebral blood flow and intelligence rating in persons over 90 years old. *Age and ageing* 1981; 10(4): 247-53.
59. Gur RC, Gur RE, Obrist WD, Hungerbuhler JP, Younkin D, Rosen AD *et al.* Sex and handedness differences in cerebral blood-flow during rest and cognitive activity. *Science (New York, N.Y.)* 1982; 217(4560): 659-661.
60. Henriksen OM, Kruuse C, Olesen J, Jensen LT, Larsson HBW, Birk S *et al.* Sources of variability of resting cerebral blood flow in healthy subjects: a study using Xe-133 SPECT measurements. *J. Cereb. Blood Flow Metab.* 2013; 33(5): 787-792.
61. Kastrop A, Li TQ, Glover GH, Kruger G, Moseley ME. Gender differences in cerebral blood flow and oxygenation response during focal physiologic neural activity. *J. Cereb. Blood Flow Metab.* 1999; 19(10): 1066-1071.
62. Henriksen OM, Jensen LT, Krabbe K, Guldberg P, Teerlink T, Rostrup E. Resting brain perfusion and selected vascular risk factors in healthy elderly subjects. *PLoS one* 2014; 9(5): e97363.
63. Deverdun J, Akbaraly TN, Charroud C, Abdenour M, Brickman AM, Chemouny S *et al.* Mean arterial pressure change associated with cerebral blood flow in healthy older adults. *Neurobiol Aging* 2016; 46: 49-57.
64. Swihart AA, Mathew RJ, Largent JW. Menstruation and cerebral blood flow. *Biol. Psychiatry* 1989; 25(5): 654-657.
65. Brackley KJ, Ramsay MM, Pipkin FB, Rubin PC. The effect of the menstrual cycle on human cerebral blood flow: studies using Doppler ultrasound. *Ultrasound Obstet. Gynecol.* 1999; 14(1): 52-57.
66. Krejza J, Mariak Z, Huba M, Wolczynski S, Lewko J. Effect of endogenous estrogen on blood flow through carotid arteries. *Stroke* 2001; 32(1): 30-6.

67. Belfort MA, Tooke-Miller C, Allen JC, Saade GR, Dildy GA, Grunewald C *et al.* Changes in flow velocity, resistance indices, and cerebral perfusion pressure in the maternal middle cerebral artery distribution during normal pregnancy. *Acta Obstet. Gynecol. Scand.* 2001; 80(2): 104-112.
68. Zatik J, Aranyosi J, Mihalka L, Pall D, Major T, Fulesdi B. Comparison of cerebral blood flow velocity as measured in preeclamptic, healthy pregnant, and nonpregnant women by transcranial Doppler sonography. *Gynecol.Obstet.Invest.* 2001; 51(4): 223-227.
69. Zeeman GG, Hatab M, Twickler DM. Maternal cerebral blood flow changes in pregnancy. *Am. J. Obstet. Gynecol.* 2003; 189(4): 968-972.
70. Penotti M, Farina M, Sironi L, Barletta L, Gabrielli L, Vignali M. Cerebral artery blood flow in relation to age and menopausal status. *Obstet. Gynecol.* 1996; 88(1): 106-109.
71. Slopian R, Junik R, Meczekalski B, Halerz-Nowakowska B, Maciejewska M, Warenik-Szymankiewicz A *et al.* Influence of hormonal replacement therapy on the regional cerebral blood flow in postmenopausal women. *Maturitas* 2003; 46(4): 255-262.
72. Conroy DA, Spielman AJ, Scott RQ. Daily rhythm of cerebral blood flow velocity. *Journal of circadian rhythms* 2005; 3(1): 3.
73. Diamant M, Harms MPM, Immink RV, Van Lieshout JJ, Van Montfrans GA. Twenty-four-hour non-invasive monitoring of systemic haemodynamics and cerebral blood flow velocity in healthy humans. *Acta Physiol. Scand.* 2002; 175(1): 1-9.
74. Hodkinson DJ, O'Daly O, Zunszain PA, Pariante CM, Lazurenko V, Zelaya FO *et al.* Circadian and homeostatic modulation of functional connectivity and regional cerebral blood flow in humans under normal entrained conditions. *Journal of cerebral blood flow and metabolism : official journal of the International Society of Cerebral Blood Flow and Metabolism* 2014.
75. Selim M, Jones R, Novak P, Zhao P, Novak V. The effects of body mass index on cerebral blood flow velocity. *Clinical Autonomic Research* 2008; 18(6): 331-338.
76. van Laar PJ, van der Graaf Y, Mali W, van der Grond J, Hendrikse J, Smart Study G. Effect of cerebrovascular risk factors on regional cerebral blood flow. *Radiology* 2008; 246(1): 198-204.
77. Weise CM, Thiyyagura P, Reiman EM, Chen KW, Krakoff J. A Potential Role for the Midbrain in Integrating Fat-Free Mass Determined Energy Needs: An (H2O)-O-15 PET Study. *Human Brain Mapping* 2015; 36(6): 2406-2415.
78. Willeumier KC, Taylor DV, Amen DG. Elevated BMI Is Associated With Decreased Blood Flow in the Prefrontal Cortex Using SPECT Imaging in Healthy Adults. *Obesity* 2011; 19(5): 1095-1097.
79. Herholz K, Buskies W, Rist M, Pawlik G, Hollmann W, Heiss WD. Regional cerebral blood-flow in man at rest and during exercise. *Journal of Neurology* 1987; 234(1): 9-13.
80. Thomas SN, Schroeder T, Secher NH, Mitchell JH. Cerebral blood-flow during submaximal and maximal dynamic exercise in humans. *J. Appl. Physiol.* 1989; 67(2): 744-748.
81. Hiura M, Nariai T, Ishii K, Sakata M, Oda K, Toyohara J *et al.* Changes in cerebral blood flow during steady-state cycling exercise: a study using oxygen-15-labeled water with PET. *J. Cereb. Blood Flow Metab.* 2014; 34(3): 389-396.
82. Hellstrom G, Wahlgren NG. Physical exercise increases middle cerebral-artery blood-flow velocity. *Neurosurgical Review* 1993; 16(2): 151-156.
83. Rasmussen P, Nybo L, Volianitis S, Moller K, Secher NH, Gjedde A. Cerebral oxygenation is reduced during hyperthermic exercise in humans. *Acta Physiol (Oxf)* 2010; 199(1): 63-70.
84. Jorgensen LG, Perko G, Secher NH. Regional cerebral-artery mean flow velocity and blood-flow during dynamic exercise in humans. *J. Appl. Physiol.* 1992; 73(5): 1825-1830.
85. Madsen PL, Sperling BK, Warming T, Schmidt JF, Secher NH, Wildschiodtz G *et al.* Middle cerebral-artery blood velocity and cerebral blood-flow and O-2 uptake during dynamic exercise. *J. Appl. Physiol.* 1993; 74(1): 245-250.
86. Moraine JJ, Lamotte M, Berre J, Niset G, Leduc A, Naeije R. Relationship of middle cerebral-artery blood-flow velocity to intensity during dynamic exercise in normal subjects. *European Journal of Applied Physiology and Occupational Physiology* 1993; 67(1): 35-38.
87. Pott F, Knudsen L, Nowak M, Nielsen HB, Hanel B, Secher NH. Middle cerebral artery blood velocity during rowing. *Acta Physiol Scand* 1997; 160(3): 251-5.
88. Doering TJ, Resch KL, Steuernagel B, Brix J, Schneider B, Fischer GC. Passive and active exercises increase cerebral blood flow velocity in young, healthy individuals. *American Journal of Physical Medicine & Rehabilitation* 1998; 77(6): 490-493.

89. Imray CHE, Myers SD, Pattinson KTS, Bradwell AR, Chan CW, Harris S *et al.* Effect of exercise on cerebral perfusion in humans at high altitude. *J. Appl. Physiol.* 2005; 99(2): 699-706.
90. Rasmussen P, Stie H, Nielsen B, Nybo L. Enhanced cerebral CO<sub>2</sub> reactivity during strenuous exercise in man. *European journal of applied physiology* 2006; 96(3): 299-304.
91. Fisher JP, Ogoh S, Young CN, Raven PB, Fadel PJ. Regulation of middle cerebral artery blood velocity during dynamic exercise in humans: influence of aging. *Journal of applied physiology (Bethesda, Md. : 1985)* 2008; 105(1): 266-73.
92. Sato K, Ogoh S, Hirasawa A, Oue A, Sadamoto T. The distribution of blood flow in the carotid and vertebral arteries during dynamic exercise in humans. *J. Physiol.-London* 2011; 589(11): 2847-2856.
93. Willie CK, Cowan EC, Ainslie PN, Taylor CE, Smith KJ, Sin PYW *et al.* Neurovascular coupling and distribution of cerebral blood flow during exercise. *Journal of Neuroscience Methods* 2011; 198(2): 270-273.
94. Marsden KR, Haykowsky MJ, Smirl JD, Jones H, Nelson MD, Altamirano-Diaz LA *et al.* Aging blunts hyperventilation-induced hypocapnia and reduction in cerebral blood flow velocity during maximal exercise. *Age (Dordr)* 2012; 34(3): 725-35.
95. Smith KJ, Wong LE, Eves ND, Koelwyn GJ, Smirl JD, Willie CK *et al.* Regional cerebral blood flow distribution during exercise: Influence of oxygen. *Respiratory Physiology & Neurobiology* 2012; 184(1): 97-105.
96. Fan JL, Kayser B. The effect of adding CO<sub>2</sub> to hypoxic inspired gas on cerebral blood flow velocity and breathing during incremental exercise. *PLoS One* 2013; 8(11): e81130.
97. Fisher JP, Hartwich D, Seifert T, Olesen ND, McNulty CL, Nielsen HB *et al.* Cerebral perfusion, oxygenation and metabolism during exercise in young and elderly individuals. *J. Physiol.-London* 2013; 591(7): 1859-1870.
98. Brugniaux JV, Marley CJ, Hodson DA, New KJ, Bailey DM. Acute exercise stress reveals cerebrovascular benefits associated with moderate gains in cardiorespiratory fitness. *J. Cereb. Blood Flow Metab.* 2014; 34(12): 1873-1876.
99. Periard JD, Racinais S. Heat stress exacerbates the reduction in middle cerebral artery blood velocity during prolonged self-paced exercise. *Scand J Med Sci Sports* 2015; 25 Suppl 1: 135-44.
100. Pugh CJA, Sprung VS, Ono K, Spence AL, Thijssen DHJ, Carter HH *et al.* The Effect of Water Immersion during Exercise on Cerebral Blood Flow. *Medicine and Science in Sports and Exercise* 2015; 47(2): 299-306.
101. Hellstrom G, FischerColbrie W, Wahlgren NG, Jogestrand T. Carotid artery blood flow and middle cerebral artery blood flow velocity during physical exercise. *J. Appl. Physiol.* 1996; 81(1): 413-418.
102. Koch A, Ivers M, Gehrt A, Schnoor P, Rump A, Rieckert H. Cerebral autoregulation is temporarily disturbed in the early recovery phase after dynamic resistance exercise. *Clinical Autonomic Research* 2005; 15(2): 83-91.
103. Ogoh S, Fisher JP, Purkayastha S, Dawson EA, Fadel PJ, White MJ *et al.* Regulation of middle cerebral artery blood velocity during recovery from dynamic exercise in humans. *Journal of applied physiology (Bethesda, Md. : 1985)* 2007; 102(2): 713-21.
104. Smith KJ, MacLeod D, Willie CK, Lewis NCS, Hoiland RL, Ikeda K *et al.* Influence of high altitude on cerebral blood flow and fuel utilization during exercise and recovery. *J. Physiol.-London* 2014; 592(24): 5507-5527.
105. Nedeltchev K, Arnold M, Nirkko A, Sturzenegger M, Rihs F, Buhler R *et al.* Changes in blood flow velocity in the middle and anterior cerebral arteries evoked by walking. *Journal of Clinical Ultrasound* 2002; 30(3): 132-138.
106. Jung J, Kang H, Shim S, Cho K, Yu J. Effects of Resistive Exercise on Cerebral Blood Flow Velocity and Pulsatility Index of Healthy People. *Journal of Physical Therapy Science* 2012; 24(9): 915-917.
107. Lyngeraa TS, Pedersen LM, Mantoni T, Belhage B, Rasmussen LS, van Lieshout JJ *et al.* Middle cerebral artery blood velocity during running. *Scand. J. Med. Sci. Sports* 2013; 23(1): e32-e37.
108. Ludyga S, Gronwald T, Hottenrott K. Effects of high vs. low cadence training on cyclists' brain cortical activity during exercise. *Journal of science and medicine in sport / Sports Medicine Australia* 2016; 19(4): 342-7.
109. Matsuo T, Watanabe S, Sorimachi M, Takao H, Takahashi T. Blood flow velocity waveforms in the middle cerebral artery during cycle exercise and recovery. *Artif. Life Robot.* 2015; 20(4): 336-340.
110. Williamson JW, Nobrega AC, McColl R, Mathews D, Winchester P, Friberg L *et al.* Activation of the insular cortex during dynamic exercise in humans. *The Journal of physiology* 1997; 503 ( Pt 2): 277-83.
111. Trangmar SJ, Chiesa ST, Llodio I, Garcia B, Kalsi KK, Secher NH *et al.* Dehydration accelerates reductions in cerebral blood flow during prolonged exercise in the heat without compromising brain metabolism. *American journal of physiology. Heart and circulatory physiology* 2015; 309(9): H1598-607.

112. Williamson JW, McColl R, Mathews D. Changes in regional cerebral blood flow distribution during postexercise hypotension in humans. *Journal of applied physiology (Bethesda, Md. : 1985)* 2004; 96(2): 719-24.
113. Murrell C, Wilson L, Cotter JD, Lucas S, Ogoh S, George K *et al.* Alterations in autonomic function and cerebral hemodynamics to orthostatic challenge following a mountain marathon. *J. Appl. Physiol.* 2007; 103(1): 88-96.
114. Smith JC, Paulson ES, Cook DB, Verber MD, Tian Q. Detecting changes in human cerebral blood flow after acute exercise using arterial spin labeling: Implications for fMRI. *Journal of Neuroscience Methods* 2010; 191(2): 258-262.
115. MacIntosh BJ, Crane DE, Sage MD, Rajab AS, Donahue MJ, McIlroy WE *et al.* Impact of a Single Bout of Aerobic Exercise on Regional Brain Perfusion and Activation Responses in Healthy Young Adults. *PLoS One* 2014; 9(1).
116. Rupp T, Jubeau M, Lamalle L, Warnking JM, Millet GY, Wuyam B *et al.* Cerebral volumetric changes induced by prolonged hypoxic exposure and whole-body exercise. *J. Cereb. Blood Flow Metab.* 2014; 34(11): 1802-1809.
117. Yamaguchi Y, Kashima H, Fukuba Y, Hayashi N. Cerebral blood flow and neurovascular coupling during static exercise. *J. Physiol. Sci.* 2014; 64(3): 195-201.
118. Xiong JH, Ma LS, Wang BQ, Narayana S, Duff EP, Egan GF *et al.* Long-term motor training induced changes in regional cerebral blood flow in both task and resting states. *Neuroimage* 2009; 45(1): 75-82.
119. Burdette JH, Laurienti PJ, Espeland MA, Morgan A, Telesford Q, Vechlekar CD *et al.* Using network science to evaluate exercise-associated brain changes in older adults. *Front Aging Neurosci* 2010; 2: 23.
120. Vicente-Campos D, Mora J, Castro-Pinero J, Gonzalez-Montesinos JL, Conde-Caveda J, Chicharro JL. Impact of a physical activity program on cerebral vasoreactivity in sedentary elderly people. *J Sports Med Phys Fitness* 2012; 52(5): 537-44.
121. Chapman SB, Aslan S, Spence JS, DeFina LF, Keebler MW, Didehbani N *et al.* Shorter term aerobic exercise improves brain, cognition, and cardiovascular fitness in aging. *Front. Aging Neurosci.* 2013; 5.
122. Murrell CJ, Cotter JD, Thomas KN, Lucas SJE, Williams MJA, Ainslie PN. Cerebral blood flow and cerebrovascular reactivity at rest and during sub-maximal exercise: Effect of age and 12-week exercise training. *Age* 2013; 35(3): 905-920.
123. Maass A, Duzel S, Goerke M, Becke A, Sobieray U, Neumann K *et al.* Vascular hippocampal plasticity after aerobic exercise in older adults. *Mol Psychiatry* 2014.
124. Tomoto T, Sugawara J, Nogami Y, Aonuma K, Maeda S. The influence of central arterial compliance on cerebrovascular hemodynamics: insights from endurance training intervention. *J. Appl. Physiol.* 2015; 119(5): 445-451.
125. Rodriguez G, Vitali P, Nobili F. Long-term effects of boxing and judo-choking techniques on brain function. *Italian Journal of Neurological Sciences* 1998; 19(6): 367-372.
126. Franke WD, Allbee KA, Spencer SE. Cerebral blood flow responses to severe orthostatic stress in fit and unfit young and older adults. *Gerontology* 2006; 52(5): 282-9.
127. Bailey DM, Marley CJ, Brugniaux JV, Hodson D, New KJ, Ogoh S *et al.* Elevated Aerobic Fitness Sustained Throughout the Adult Lifespan Is Associated With Improved Cerebral Hemodynamics. *Stroke* 2013; 44(11): 3235-3238.
128. Tarumi T, Gonzales MM, Fallow B, Nualnim N, Pyron M, Tanaka H *et al.* Central artery stiffness, neuropsychological function, and cerebral perfusion in sedentary and endurance-trained middle-aged adults. *J. Hypertens.* 2013; 31(12): 2400-2409.
129. Thomas BP, Yezhuvath US, Tseng BY, Liu PY, Levine BD, Zhang R *et al.* Life-Long Aerobic Exercise Preserved Baseline Cerebral Blood Flow but Reduced Vascular Reactivity to CO<sub>2</sub>. *Journal of Magnetic Resonance Imaging* 2013; 38(5): 1177-1183.
130. Zhu YS, Tarumi T, Tseng BY, Palmer DM, Levine BD, Zhang R. Cerebral vasomotor reactivity during hypo- and hypercapnia in sedentary elderly and Masters athletes. *J. Cereb. Blood Flow Metab.* 2013; 33(8): 1190-1196.
131. Fluck D, Braz ID, Keiser S, Huppini F, Haider T, Hilty MP *et al.* Age, aerobic fitness, and cerebral perfusion during exercise: role of carbon dioxide. *American journal of physiology. Heart and circulatory physiology* 2014; 307(4): H515-23.
132. Xu X, Jerskey BA, Cote DM, Walsh EG, Hassenstab JJ, Ladino ME *et al.* Cerebrovascular perfusion among older adults is moderated by strength training and gender. *Neurosci Lett* 2014; 560: 26-30.
133. Zimmerman B, Sutton BP, Low KA, Fletcher MA, Tan CH, Schneider-Garces N *et al.* Cardiorespiratory fitness mediates the effects of aging on cerebral blood flow. *Front. Aging Neurosci.* 2014; 6.
134. Boraxbekk C-J, Salami A, Wåhlin A, Nyberg L. Physical activity over a decade modifies age-related decline in perfusion, gray matter volume, and functional connectivity of the posterior default-mode network—A multimodal approach. *Neuroimage* 2015.

135. Braz ID, Fluck D, Lip GY, Lundby C, Fisher JP. Impact of aerobic fitness on cerebral blood flow and cerebral vascular responsiveness to CO in young and older men. *Scand J Med Sci Sports* 2016.
136. Johnson NF, Gold BT, Bailey AL, Clasey JL, Hakun JG, White M *et al.* Cardiorespiratory fitness modifies the relationship between myocardial function and cerebral blood flow in older adults. *Neuroimage* 2016; 131: 126-32.
137. Alfini AJ, Weiss LR, Leitner BP, Smith TJ, Hagberg JM, Smith JC. Hippocampal and Cerebral Blood Flow after Exercise Cessation in Master Athletes. *Front Aging Neurosci* 2016; 8: 184.
138. Buck A, Schirlo C, Jasinsky V, Weber B, Burger C, von Schulthess GK *et al.* Changes of cerebral blood flow during short-term exposure to normobaric hypoxia. *J. Cereb. Blood Flow Metab.* 1998; 18(8): 906-910.
139. Blaber AP, Hartley T, Pretorius PJ. Effect of acute exposure to 3,660 m altitude on orthostatic responses and tolerance. *J. Appl. Physiol.* 2003; 95(2): 591-601.
140. Passino C, Cencetti S, Spadacina G, Quintana R, Parker D, Robergs R *et al.* Persistence of baroreceptor control of cerebral blood flow velocity at a simulated altitude of 5000 m. *J. Hypertens.* 2007; 25(9): 1862-1870.
141. Imray C, Chan C, Stubbings A, Rhodes H, Patey S, Wilson MH *et al.* Time course variations in the mechanisms by which cerebral oxygen delivery is maintained on exposure to hypoxia/altitude. *High altitude medicine & biology* 2014; 15(1): 21-7.
142. Feddersen B, Neupane P, Thanbichler F, Hadolt I, Sattelmeyer V, Pfeifferkorn T *et al.* Regional differences in the cerebral blood flow velocity response to hypobaric hypoxia at high altitudes. *J Cereb Blood Flow Metab* 2015.
143. Subudhi AW, Fan JL, Evero O, Bourdillon N, Kayser B, Julian CG *et al.* AltitudeOmics: cerebral autoregulation during ascent, acclimatization, and re-exposure to high altitude and its relation with acute mountain sickness. *J. Appl. Physiol.* 2014; 116(7): 724-729.
144. Fluck D, Siebenmann C, Keiser S, Cathomen A, Lundby C. Cerebrovascular reactivity is increased with acclimatization to 3,454 m altitude. *J Cereb Blood Flow Metab* 2015.
145. Willie CK, Smith KJ, Day TA, Ray LA, Lewis NCS, Bakker A *et al.* Regional cerebral blood flow in humans at high altitude: gradual ascent and 2 wk at 5,050 m. *J. Appl. Physiol.* 2014; 116(7): 905-910.
146. Severing JW, Chiodi H, Eger EI, Brandsta.B, Hornbein TF. Cerebral blood flow in man at high altitude - role of cerebrospinal fluid pH in normalization of flow in chronic hypocapnia. *Circulation Research* 1966; 19(2): 274-&.
147. Guadagno AG, Morgagni F, Vicenzini E, Davi L, Appiani GC, Tomao E. Cerebral Vascular Response in Airmen Exposed to Hypobaric Hypoxia. *Aviation Space and Environmental Medicine* 2011; 82(12): 1138-1142.
148. Ter Minassian A, Beydon L, Ursino M, Gardette B, Gortan C, Richalet JP. Doppler study of middle cerebral artery blood flow velocity and cerebral autoregulation during a simulated ascent of Mount Everest. *Wilderness & environmental medicine* 2001; 12(3): 175-183.
149. Subudhi AW, Fan JL, Evero O, Bourdillon N, Kayser B, Julian CG *et al.* AltitudeOmics: effect of ascent and acclimatization to 5260 m on regional cerebral oxygen delivery. *Exp. Physiol.* 2014; 99(5): 772-781.
150. Imray CHE, Walsh S, Clarke T, Tiivas C, Hoar H, Harvey TC *et al.* Effects of breathing air containing 3% carbon dioxide, 35% oxygen or a mixture of 3% carbon dioxide/35% oxygen on cerebral and peripheral oxygenation at 150 m and 3459 m. *Clin. Sci.* 2003; 104(3): 203-210.
151. Ainslie PN, Ogoh S, Burgess K, Celi L, McGrattan K, Peebles K *et al.* Differential effects of acute hypoxia and high altitude on cerebral blood flow velocity and dynamic cerebral autoregulation: alterations with hyperoxia. *J. Appl. Physiol.* 2008; 104(2): 490-498.
152. Van Osta A, Moraine JJ, Melot C, Mairbaurl H, Maggiorini M, Naeije R. Effects of high altitude exposure on cerebral hemodynamics in normal subjects. *Stroke* 2005; 36(3): 557-60.
153. Fan JL, Burgess KR, Basnyat R, Thomas KN, Peebles KC, Lucas SJE *et al.* Influence of high altitude on cerebrovascular and ventilatory responsiveness to CO<sub>2</sub>. *J. Physiol.-London* 2010; 588(3): 539-549.
154. Villien M, Bouzat P, Rupp T, Robach P, Lamalle L, Tropres I *et al.* Changes in cerebral blood flow and vasoreactivity to CO<sub>2</sub> measured by arterial spin labeling after 6 days at 4350 m. *Neuroimage* 2013; 72: 272-279.
155. Jansen GFA, Krins A, Basnyat B, Bosch A, Odoom JA. Cerebral autoregulation in subjects adapted and not adapted to high altitude. *Stroke* 2000; 31(10): 2314-2318.
156. Lucas SJE, Burgess KR, Thomas KN, Donnelly J, Peebles KC, Lucas RAI *et al.* Alterations in cerebral blood flow and cerebrovascular reactivity during 14 days at 5050 m. *J. Physiol.-London* 2011; 589(3): 741-753.

157. Sanborn MR, Edsell ME, Kim MN, Mesquita R, Putt ME, Imray C *et al.* Cerebral hemodynamics at altitude: effects of hyperventilation and acclimatization on cerebral blood flow and oxygenation. *Wilderness & environmental medicine* 2015; 26(2): 133-41.
158. Moller K, Paulson OB, Hornbein TF, Colier W, Paulson AS, Roach RC *et al.* Unchanged cerebral blood flow and oxidative metabolism after acclimatization to high altitude. *J. Cereb. Blood Flow Metab.* 2002; 22(1): 118-126.
159. Iwasaki K, Zhang R, Zuckerman JH, Ogawa Y, Hansen LH, Levine BD. Impaired dynamic cerebral autoregulation at extreme high altitude even after acclimatization. *J. Cereb. Blood Flow Metab.* 2011; 31(1): 283-292.
160. Smirl JD, Lucas SJE, Lewis NCS, DuManiors GR, Smith KJ, Bakker A *et al.* Cerebral pressure-flow relationship in lowlanders and natives at high altitude. *J. Cereb. Blood Flow Metab.* 2014; 34(2): 248-257.
161. Sorensen SC, Lassen NA, Severing JW, Coudert J, Zamora MP. Cerebral glucose-metabolism and cerebral blood-flow in high altitude residents. *J. Appl. Physiol.* 1974; 37(3): 305-310.
162. Huang SY, Sun SF, Droma T, Zhuang JG, Tao JX, McCullough RG *et al.* Internal carotid arterial flow velocity during exercise in tibetan and han residents of Lhasa (3,658-M). *J. Appl. Physiol.* 1992; 73(6): 2638-2642.
163. Jansen GFA, Krins A, Basnyat B, Odoom JA, Ince C. Role of the altitude level on cerebral autoregulation in residents at high altitude. *J. Appl. Physiol.* 2007; 103(2): 518-523.
164. Jacobs A, Keymeulen B, Eeckhout E, Degeeter F, Somers G, Bossuyt A. Semiquantitative analysis of cerebral blood-flow by means of (99)TCM-HMPAO SPECT in individuals before and after a high-altitude himalayan expedition. *Nuclear Medicine Communications* 1993; 14(8): 702-705.
165. Jansen GFA, Krins A, Basnyat B. Cerebral vasomotor reactivity at high altitude in humans. *J. Appl. Physiol.* 1999; 86(2): 681-686.
166. Di Piero V, Cappagli M, Pastena L, Faralli F, Mainardi G, Di Stani F *et al.* Cerebral effects of hyperbaric oxygen breathing: a CBF-SPECT study on professional divers. *European Journal of Neurology* 2002; 9(4): 419-421.
167. Slosman DO, de Ribaupierre S, Chicherio C, Ludwig C, Montandon ML, Allaoua M *et al.* Negative neurofunctional effects of frequency, depth and environment in recreational scuba diving: the Geneva "memory dive" study. *British Journal of Sports Medicine* 2004; 38(2): 108-114.
168. Moen G, Specht K, Taxt T, Sundal E, Gronning M, Thorsen E *et al.* Cerebral diffusion and perfusion deficits in North Sea divers. *Acta Radiologica* 2010; 51(9): 1050-1058.
169. Duschek S, Schandry R. Cognitive performance and cerebral blood flow in essential hypotension. *Psychophysiology* 2004; 41(6): 905-913.
170. van Osch MJP, Jansen PAF, Vingerhoets RW, van der Grond J. Association between supine cerebral perfusion and symptomatic orthostatic hypotension. *Neuroimage* 2005; 27(4): 789-794.
171. Stegagno L, Patrìti D, Duschek S, Herbert B, Schandry R. Cerebral blood flow in essential hypotension during emotional activation. *Psychophysiology* 2007; 44(2): 226-232.
172. Williamson JW, Querry R, McColl R, Mathews D. Are decreases in insular regional cerebral blood flow sustained during postexercise hypotension? *Medicine and science in sports and exercise* 2009; 41(3): 574-80.
173. Lewis NC, Smith KJ, Bain AR, Wildfong KW, Numan T, Ainslie PN. Impact of transient hypotension on regional cerebral blood flow in humans. *Clinical science (London, England : 1979)* 2015; 129(2): 169-78.
174. Lucas SJE, Tzeng YC, Galvin SD, Thomas KN, Ogoh S, Ainslie PN. Influence of Changes in Blood Pressure on Cerebral Perfusion and Oxygenation. *Hypertension* 2010; 55(3): 698-U44.
175. Tzeng YC, MacRae BA, Ainslie PN, Chan GSH. Fundamental relationships between blood pressure and cerebral blood flow in humans. *J. Appl. Physiol.* 2014; 117(9): 1037-1048.
176. Mallett BL, Veall N. Investigation of cerebral blood-flow in hypertension, using radioactive-Xenon inhalation and extracranial recording. *Lancet* 1963; 1(729): 1081-&.
177. Nobili F, Rodriguez G, Marengo S, Decarli F, Gambaro M, Castello C *et al.* Regional cerebral blood-flow in chronic hypertension - a correlative study. *Stroke* 1993; 24(8): 1148-1153.
178. Claus JJ, Breteler MMB, Hasan D, Krenning EP, Bots ML, Grobbee DE *et al.* Vascular risk factors, atherosclerosis, cerebral white matter lesions and cerebral perfusion in a population-based study. *Eur. J. Nucl. Med.* 1996; 23(6): 675-682.
179. Cho SJ, Sohn YH, Kim GW, Kim JS. Blood flow velocity changes in the middle cerebral artery as an index of the chronicity of hypertension. *J. Neurol. Sci.* 1997; 150(1): 77-80.

180. Sinha S, Misra A, Bal CS, Gouda NK, Pandey RM, Tiwari S. Evaluation of cerebral blood flow by single-photon emission computed tomography in young Asian Indians with hypertension. *J. Hum. Hypertens.* 2006; 20(2): 143-148.
181. Zhang P, Huang Y, Li Y, Lu M, Wu Y. A large-scale study on relationship between cerebral blood flow velocity and blood pressure in a natural population. *J. Hum. Hypertens.* 2006; 20(10): 742-748.
182. Dai W, Lopez OL, Carmichael OT, Becker JT, Kuller LH, Gach HM. Abnormal regional cerebral blood flow in cognitively normal elderly subjects with hypertension. *Stroke* 2008; 39(2): 349-354.
183. Waldstein SR, Lefkowitz DM, Siegel EL, Rosenberger WF, Spencer RJ, Tankard CF *et al.* Reduced cerebral blood flow in older men with higher levels of blood pressure. *J. Hypertens.* 2010; 28(5): 993-998.
184. Alosco ML, Gunstad J, Xu X, Clark US, Labbe DR, Riskin-Jones HH *et al.* The impact of hypertension on cerebral perfusion and cortical thickness in older adults. *J. Am. Soc. Hypertens.* 2014; 8(8): 561-570.
185. Richard Jennings J, Allen B, Gianaros PJ, Thayer JF, Manuck SB. Focusing neurovisceral integration: cognition, heart rate variability, and cerebral blood flow. *Psychophysiology* 2015; 52(2): 214-24.
186. Nybo L, Moller K, Volianitis S, Nielsen B, Secher NH. Effects of hyperthermia on cerebral blood flow and metabolism during prolonged exercise in humans. *J. Appl. Physiol.* 2002; 93(1): 58-64.
187. Nybo L, Secher NH, Nielsen B. Inadequate heat release from the human brain during prolonged exercise with hyperthermia. *The Journal of physiology* 2002; 545(Pt 2): 697-704.
188. Low DA, Wingo JE, Keller DM, Davis SL, Cui J, Zhang R *et al.* Dynamic cerebral autoregulation during passive heat stress in humans. *American journal of physiology. Regulatory, integrative and comparative physiology* 2009; 296(5): R1598-605.
189. Nelson MD, Haykowsky MJ, Stickland MK, Altamirano-Diaz LA, Willie CK, Smith KJ *et al.* Reductions in cerebral blood flow during passive heat stress in humans: partitioning the mechanisms. *The Journal of physiology* 2011; 589(Pt 16): 4053-64.
190. Bain AR, Smith KJ, Lewis NC, Foster GE, Wildfong KW, Willie CK *et al.* Regional changes in brain blood flow during severe passive hyperthermia: effects of Pa-CO<sub>2</sub> and extracranial blood flow. *J. Appl. Physiol.* 2013; 115(5): 653-659.
191. Ogoh S, Sato K, Okazaki K, Miyamoto T, Hirasawa A, Morimoto K *et al.* Blood flow distribution during heat stress: cerebral and systemic blood flow. *J. Cereb. Blood Flow Metab.* 2013; 33(12): 1915-1920.
192. Lee JF, Christmas KM, Harrison ML, Kim K, Hurr C, Brothers RM. Cerebral vasoreactivity: impact of heat stress and lower body negative pressure. *Clinical autonomic research : official journal of the Clinical Autonomic Research Society* 2014; 24(3): 135-41.
193. Ogoh S, Sato K, Okazaki K, Miyamoto T, Hirasawa A, Shibasaki M. Hyperthermia modulates regional differences in cerebral blood flow to changes in CO<sub>2</sub>. *Journal of applied physiology (Bethesda, Md. : 1985)* 2014; 117(1): 46-52.
194. Ross EZ, Cotter JD, Wilson L, Fan JL, Lucas SJE, Ainslie PN. Cerebrovascular and corticomotor function during progressive passive hyperthermia in humans. *J. Appl. Physiol.* 2012; 112(5): 748-758.
195. Qian S, Jiang Q, Liu K, Li B, Li M, Li L *et al.* Effects of short-term environmental hyperthermia on patterns of cerebral blood flow. *Physiol Behav* 2014; 128: 99-107.
196. Haarala C, Aalto S, Hautzel H, Julkunen L, Rinne JO, Laine M *et al.* Effects of a 902 MHz mobile phone on cerebral blood flow in humans: a PET study. *Neuroreport* 2003; 14(16): 2019-2023.
197. Aalto S, Haarala C, Bruck A, Sipila H, Hamalainen H, Rinne JO. Mobile phone affects cerebral blood flow in humans. *J. Cereb. Blood Flow Metab.* 2006; 26(7): 885-890.
198. Kwon MS, Vorobyev V, Kannala S, Laine M, Rinne JO, Toivonen T *et al.* No effects of short-term GSM mobile phone radiation on cerebral blood flow measured using positron emission tomography. *Bioelectromagnetics* 2012; 33(3): 247-256.
199. Ghosn R, Thuroczy G, Loos N, Brenet-Dufour V, Liabeuf S, de Seze R *et al.* Effects of GSM 900 MHz on Middle Cerebral Artery Blood Flow Assessed by Transcranial Doppler Sonography. *Radiation Research* 2012; 178(6): 543-550.
200. Mizuno Y, Moriguchi Y, Hikage T, Terao Y, Ohnishi T, Nojima T *et al.* Effects of W-CDMA 1950 MHz EMF Emitted by Mobile Phones on Regional Cerebral Blood Flow in Humans. *Bioelectromagnetics* 2009; 30(7): 536-544.
201. Huber R, Treyer V, Schuderer J, Berthold T, Buck A, Kuster N *et al.* Exposure to pulse-modulated radio frequency electromagnetic fields affects regional cerebral blood flow. *European Journal of Neuroscience* 2005; 21(4): 1000-1006.
202. Presley TD, Morgan AR, Bechtold E, Clodfelter W, Dove RW, Jennings JM *et al.* Acute effect of a high nitrate diet on brain perfusion in older adults. *Nitric Oxide-Biology and Chemistry* 2011; 24(1): 34-42.
203. Mehrpour M, Akhoundi FH, Rezaei Z. Effects of fasting during Ramadan on cerebrovascular hemodynamics: A transcranial Doppler study. *Iranian journal of neurology* 2016; 15(1): 23-7.



204. Tataranni PA, Gautier JF, Chen KW, Uecker A, Bandy D, Salbe AD *et al.* Neuroanatomical correlates of hunger and satiation in humans using positron emission tomography. *Proceedings of the National Academy of Sciences of the United States of America* 1999; 96(8): 4569-4574.
205. Gautier JF, Del Parigi A, Chen KW, Salbe AD, Bandy D, Pratley RE *et al.* Effect of satiation on brain activity in obese and lean women. *Obesity Research* 2001; 9(11): 676-684.
206. Del Parigi A, Chen K, Salbe AD, Gautier JF, Ravussin E, Reiman EM *et al.* Tasting a liquid meal after a prolonged fast is associated with preferential activation of the left hemisphere. *Neuroreport* 2002; 13(9): 1141-5.
207. Del Parigi A, Chen KW, Gautier JF, Salbe AD, Pratley RE, Ravussin E *et al.* Sex differences in the human brain's response to hunger and satiation. *American Journal of Clinical Nutrition* 2002; 75(6): 1017-1022.
208. Frank S, Linder K, Kullmann S, Heni M, Ketterer C, Cavusoglu M *et al.* Fat intake modulates cerebral blood flow in homeostatic and gustatory brain areas in humans. *American Journal of Clinical Nutrition* 2012; 95(6): 1342-1349.
209. Frank S, Linder K, Fritsche L, Hege MA, Kullmann S, Krzeminski A *et al.* Olive oil aroma extract modulates cerebral blood flow in gustatory brain areas in humans. *American Journal of Clinical Nutrition* 2013; 98(5): 1360-1366.
210. Page KA, Chan O, Arora J, Belfort-DeAguiar R, Dzuira J, Roehmholdt B *et al.* Effects of Fructose vs Glucose on Regional Cerebral Blood Flow in Brain Regions Involved With Appetite and Reward Pathways. *Jama-Journal of the American Medical Association* 2013; 309(1): 63-70.
211. Xu F, Liu PY, Pascual JM, Xiao GH, Huang H, Lu HZ. Acute Effect of Glucose on Cerebral Blood Flow, Blood Oxygenation, and Oxidative Metabolism. *Human Brain Mapping* 2015; 36(2): 707-716.
212. Totman JJ, Marciani L, Foley S, Campbell E, Hoad CL, Macdonald IA *et al.* Characterization of the time course of the superior mesenteric, abdominal aorta, internal carotid and vertebral arteries blood flow response to the oral glucose challenge test using magnetic resonance imaging. *Physiological Measurement* 2009; 30(10): 1117-1136.
213. Egan G, Silk T, Zamarripa F, Williams J, Federico P, Cunningham R *et al.* Neural correlates of the emergence of consciousness of thirst. *Proceedings of the National Academy of Sciences of the United States of America* 2003; 100(25): 15241-15246.
214. Morales G, Romero SA, Rickards CA, Ryan KL, Convertino VA, Cooke WH. Effects of dehydration on cerebrovascular control during standing after heavy resistance exercise. *J. Appl. Physiol.* 2012; 112(11): 1875-1883.
215. Denton D, Shade R, Zamarripa F, Egan G, Blair-West J, McKinley M *et al.* Correlation of regional cerebral blood flow and change of plasma sodium concentration during genesis and satiation of thirst. *Proceedings of the National Academy of Sciences of the United States of America* 1999; 96(5): 2532-2537.
216. Farrell MJ, Zamarripa F, Shade R, Phillips PA, McKinley M, Fox PT *et al.* Effect of aging on regional cerebral blood flow responses associated with osmotic thirst and its satiation by water drinking: A PET study. *Proceedings of the National Academy of Sciences of the United States of America* 2008; 105(1): 382-387.
217. Farrell MJ, Bowala TK, Gavrilescu M, Phillips PA, McKinley MJ, McAllen RM *et al.* Cortical activation and lamina terminalis functional connectivity during thirst and drinking in humans. *American Journal of Physiology-Regulatory Integrative and Comparative Physiology* 2011; 301(3): R623-R631.
218. Denton D, Shade R, Zamarripa F, Egan G, Blair-West J, McKinley M *et al.* Neuroimaging of genesis and satiation of thirst and an interoceptor-driven theory of origins of primary consciousness. *Proceedings of the National Academy of Sciences of the United States of America* 1999; 96(9): 5304-5309.
219. Parsons LM, Denton D, Egan G, McKinley M, Shade R, Lancaster J *et al.* Neuroimaging evidence implicating cerebellum in support of sensory/cognitive processes associated with thirst. *Proceedings of the National Academy of Sciences of the United States of America* 2000; 97(5): 2332-2336.
220. Gur RE, Gur RC. Gender differences in regional cerebral blood-flow. *Schizophr. Bull.* 1990; 16(2): 247-254.
221. Greeley WJ, Kern FH, Meliones JN, Ungerleider RM. Effect of deep hypothermia and circulatory arrest on cerebral blood-flow and metabolism. *Ann. Thorac. Surg.* 1993; 56(6): 1464-1466.
222. Therkelsen K, Jensen KA, Freundlich M, Thorshauge H, Bunemann L, Nielsen LB. Endothelin-1 and cerebral blood-flow - influence of hypoxia, hypercapnia and indomethacin on circulating endothelin levels in healthy-volunteers. *Scand. J. Clin. Lab. Invest.* 1994; 54(6): 441-451.
223. Rostrup E, Larsson HB, Toft PB, Garde K, Henriksen O. Signal changes in gradient echo images of human brain induced by hypo- and hyperoxia. *NMR in biomedicine* 1995; 8(1): 41-7.
224. Poulin MJ, Fatemian M, Tansley JG, O'Connor DF, Robbins PA. Changes in cerebral blood flow during and after 48 h of both isocapnic and poikilocapnic hypoxia in humans. *Exp. Physiol.* 2002; 87(5): 633-642.

225. Ainslie PN, Barach A, Murrell C, Hamlin M, Hellems J, Ogoh S. Alterations in cerebral autoregulation and cerebral blood flow velocity during acute hypoxia: rest and exercise. *Am. J. Physiol.-Heart Circul. Physiol.* 2007; 292(2): H976-H983.
226. Iwasaki K, Ogawa Y, Shibata S, Aoki K. Acute exposure to normobaric mild hypoxia alters dynamic relationships between blood pressure and cerebral blood flow at very low frequency. *J. Cereb. Blood Flow Metab.* 2007; 27(4): 776-784.
227. Nishimura N, Iwasaki K, Ogawa Y, Aoki K. Decreased steady-state cerebral blood flow velocity and altered dynamic cerebral autoregulation during 5-h sustained 15% O-2 hypoxia. *J. Appl. Physiol.* 2010; 108(5): 1154-1161.
228. Xu F, Liu PY, Pascual JM, Xiao GH, Lu HZ. Effect of hypoxia and hyperoxia on cerebral blood flow, blood oxygenation, and oxidative metabolism. *J. Cereb. Blood Flow Metab.* 2012; 32(10): 1909-1918.
229. Harris AD, Murphy K, Diaz CM, Saxena N, Hall JE, Liu TT *et al.* Cerebral blood flow response to acute hypoxic hypoxia. *NMR in biomedicine* 2013; 26(12): 1844-1852.
230. Ogoh S, Sato K, Nakahara H, Okazaki K, Subudhi AW, Miyamoto T. Effect of acute hypoxia on blood flow in vertebral and internal carotid arteries. *Exp. Physiol.* 2013; 98(3): 692-698.
231. Ainslie PN, Shaw AD, Smith KJ, Willie CK, Ikeda K, Graham J *et al.* Stability of cerebral metabolism and substrate availability in humans during hypoxia and hyperoxia. *Clinical science (London, England : 1979)* 2014; 126(9): 661-70.
232. Lewis NCS, Messenger L, Monteleone B, Ainslie PN. Effect of acute hypoxia on regional cerebral blood flow: effect of sympathetic nerve activity. *J. Appl. Physiol.* 2014; 116(9): 1189-1196.
233. Ellingsen I, Hauge A, Nicolaysen G, Thoresen M, Walloe L. Changes in human cerebral blood-flow due to step changes in PaO2 and PaCO2. *Acta Physiol. Scand.* 1987; 129(2): 157-163.
234. Willie CK, Macleod DB, Shaw AD, Smith KJ, Tzeng YC, Eves ND *et al.* Regional brain blood flow in man during acute changes in arterial blood gases. *J. Physiol.-London* 2012; 590(14): 3261-3275.
235. Ogoh S, Nakahara H, Ainslie PN, Miyamoto T. The effect of oxygen on dynamic cerebral autoregulation: critical role of hypocapnia. *Journal of applied physiology (Bethesda, Md. : 1985)* 2010; 108(3): 538-43.
236. Mardimae A, Balaban DY, Machina MA, Han JS, Katznelson R, Minkovich LL *et al.* The interaction of carbon dioxide and hypoxia in the control of cerebral blood flow. *Pflugers Arch.* 2012; 464(4): 345-351.
237. Fortune JB, Feustel PJ, Deluna C, Graca L, Hasselbarth J, Kupinski AM. Cerebral blood-flow and blood-volume in response to O-2 and CO2 changes in normal humans. *J. Trauma-Injury Inf. Crit. Care* 1995; 39(3): 463-472.
238. Poulin MJ, Robbins PA. Influence of cerebral blood flow on the ventilatory response to hypoxia in humans. *Exp. Physiol.* 1998; 83(1): 95-106.
239. Poulin MJ, Liang PJ, Robbins PA. Dynamics of the cerebral blood flow response to step changes in end-tidal P-CO2 and P-O2 in humans. *J. Appl. Physiol.* 1996; 81(3): 1084-1095.
240. Noth U, Kotajima F, Deichmann R, Turner R, Corfield DR. Mapping of the cerebral vascular response to hypoxia and hypercapnia using quantitative perfusion MRI at 3T. *NMR in biomedicine* 2008; 21(5): 464-472.
241. Beaudin AE, Brugniaux JV, Vohringer M, Flewitt J, Green JD, Friedrich MG *et al.* Cerebral and myocardial blood flow responses to hypercapnia and hypoxia in humans. *Am. J. Physiol.-Heart Circul. Physiol.* 2011; 301(4): H1678-H1686.
242. Vestergaard MB, Lindberg U, Aachmann-Andersen NJ, Lisbjerg K, Christensen SJ, Law I *et al.* Acute hypoxia increases the cerebral metabolic rate - a magnetic resonance imaging study. *Journal of cerebral blood flow and metabolism : official journal of the International Society of Cerebral Blood Flow and Metabolism* 2015.
243. Cohen PJ, Alexandre SC, Smith TC, Reivich M, Wollman H. Effects of hypoxia and normocarbina on cerebral blood flow and metabolism in conscious man. *J. Appl. Physiol.* 1967; 23(2): 183-&.
244. Blogg SL, Gennser M. Cerebral blood flow velocity and psychomotor performance during acute hypoxia. *Aviat. Space Environ. Med.* 2006; 77(2): 107-113.
245. Cohen PJ, Alexander SC, Wollman H. Effects of hypocarbina and of hypoxia with normocarbina on cerebral blood flow and metabolism in man. *Scandinavian journal of clinical and laboratory investigation. Supplementum* 1968; 102: IV:A.
246. Imray C, Chan C, Stubbings A, Rhodes H, Patey S, Wilson MH *et al.* Time Course Variations in the Mechanisms by Which Cerebral Oxygen Delivery Is Maintained on Exposure to Hypoxia/Altitude. *High altitude medicine & biology* 2014; 15(1): 21-27.
247. Tymko MM, Hoiland RL, Kuca T, Boulet LM, Tremblay JC, Pinske BK *et al.* Measuring the human ventilatory and cerebral blood flow response to CO2: a technical consideration for the end-tidal-to-arterial gas gradient. *J. Appl. Physiol.* 2016; 120(2): 282-296.

248. Willie CK, MacLeod DB, Smith KJ, Lewis NC, Foster GE, Ikeda K *et al.* The contribution of arterial blood gases in cerebral blood flow regulation and fuel utilization in man at high altitude. *J. Cereb. Blood Flow Metab.* 2015; 35(5): 873-881.
249. Tuteur P, Reivich M, Goldberg HI, Cooper ES, West JW, McHenry LC *et al.* Transient responses of cerebral blood-flow and ventilation to changes in PaCO<sub>2</sub> in normal subjects and patients with cerebrovascular-disease. *Stroke* 1976; 7(6): 584-590.
250. Mathew RJ, Wilson WH. Cerebral blood-flow changes induced by CO<sub>2</sub> in anxiety. *Psychiatry Res.* 1988; 23(3): 285-294.
251. Choksey MS, Costa DC, Iannotti F, Ell PJ, Crockard HA. Tc-99(M) HMPAO SPET and cerebral blood-flow - a study of CO<sub>2</sub> reactivity. *Nucl. Med. Commun.* 1989; 10(8): 609-618.
252. Ulrich PT, Becker T, Kempinski OS. Correlation of cerebral blood-flow and MCA flow velocity measured in healthy-volunteers during acetazolamide and CO<sub>2</sub> stimulation. *J. Neurol. Sci.* 1995; 129(2): 120-130.
253. Kastrup A, Li TQ, Glover GH, Moseley ME. Cerebral blood flow-related signal changes during breath-holding. *Am. J. Neuroradiol.* 1999; 20(7): 1233-1238.
254. Li TQ, Kastrup A, Moseley ME, Glover GH. Changes in baseline cerebral blood flow in humans do not influence regional cerebral blood flow response to photic stimulation. *J. Magn. Reson. Imaging* 2000; 12(5): 757-762.
255. Rostrup E, Law I, Blinkenberg M, Larsson HB, Born AP, Holm S *et al.* Regional differences in the CBF and BOLD responses to hypercapnia: a combined PET and fMRI study. *Neuroimage* 2000; 11(2): 87-97.
256. Ponto LLB, Kathol RG, Kettelkamp R, Watkins GL, Richmond JCW, Clark J *et al.* Global cerebral blood flow after CO<sub>2</sub> inhalation in normal subjects and patients with panic disorder determined with O-15 water and PET. *J. Anxiety Disord.* 2002; 16(3): 247-258.
257. Floyd TF, Clark JM, Gelfand R, Detre JA, Ratcliffe S, Guvakov D *et al.* Independent cerebral vasoconstrictive effects of hyperoxia and accompanying arterial hypocapnia at 1 ATA. *Journal of applied physiology (Bethesda, Md. : 1985)* 2003; 95(6): 2453-61.
258. Pandit JJ, Mohan RM, Paterson ND, Poulin MJ. Cerebral blood flow sensitivity to CO<sub>2</sub> measured with steady-state and Read's rebreathing methods. *Respir. Physiol. Neuro.* 2003; 137(1): 1-10.
259. Noth U, Meadows GE, Kotajima F, Deichmann R, Corfield DR, Turner R. Cerebral vascular response to hypercapnia: Determination with perfusion MRI at 1.5 and 3.0 tesla using a pulsed arterial spin labeling technique. *J. Magn. Reson. Imaging* 2006; 24(6): 1229-1235.
260. Vantanajal JS, Ashmead JC, Anderson TJ, Hepple RT, Poulin MJ. Differential sensitivities of cerebral and brachial blood flow to hypercapnia in humans. *J. Appl. Physiol.* 2007; 102(1): 87-93.
261. Robertson JW, Debert CT, Frayne R, Poulin MJ. Variability of middle cerebral artery blood flow with hypercapnia in women. *Ultrasound Med. Biol.* 2008; 34(5): 730-740.
262. Ogoh S, Ainslie PN, Miyamoto T. Onset responses of ventilation and cerebral blood flow to hypercapnia in humans: rest and exercise. *J. Appl. Physiol.* 2009; 106(3): 880-886.
263. An HY, Sen S, Chen YS, Powers WJ, Lin WL. Noninvasive Measurements of Cerebral Blood Flow, Oxygen Extraction Fraction, and Oxygen Metabolic Index in Human with Inhalation of Air and Carbogen using Magnetic Resonance Imaging. *Transl. Stroke Res.* 2012; 3(2): 246-254.
264. Regan RE, Duffin J, Fisher JA. Instability of the Middle Cerebral Artery Blood Flow in Response to CO<sub>2</sub>. *PLoS One* 2013; 8(7).
265. Donahue MJ, Faraco CC, Strother MK, Chappell MA, Rane S, Dethrage LM *et al.* Bolus arrival time and cerebral blood flow responses to hypercarbia. *J. Cereb. Blood Flow Metab.* 2014; 34(7): 1243-1252.
266. Croal PL, Hall EL, Driver ID, Brookes MJ, Gowland PA, Francis ST. The effect of isocapnic hyperoxia on neurophysiology as measured with MRI and MEG. *Neuroimage* 2015; 105: 323-31.
267. Tancredi FB, Lajoie I, Hoge RD. Test-retest reliability of cerebral blood flow and blood oxygenation level-dependent responses to hypercapnia and hyperoxia using dual-echo pseudo-continuous arterial spin labeling and step changes in the fractional composition of inspired gases. *Journal of magnetic resonance imaging : JMRI* 2015.
268. Zhou YX, Rodgers ZB, Kuo AH. Cerebrovascular reactivity measured with arterial spin labeling and blood oxygen level dependent techniques. *Magn. Reson. Imaging* 2015; 33(5): 566-576.
269. Ackerman RH, Subramanyam R, Correia JA, Alpert NM, Taveras JM. Positron imaging of cerebral blood flow during continuous inhalation of C<sup>15</sup>O<sub>2</sub>. *Stroke* 1980; 11(1): 45-9.
270. Hauge A, Thoresen M, Walloe L. Changes in cerebral blood-flow during hyperventilation and CO<sub>2</sub>-breathing measured transcutaneously in humans by a bidirectional, pulsed, ultrasound Doppler blood velocity-meter. *Acta Physiol. Scand.* 1980; 110(2): 167-173.

271. Clark JM, Skolnick BE, Gelfand R, Farber RE, Stierheim M, Stevens WC *et al.* Relationship of Xe-133 cerebral blood flow to middle cerebral arterial flow velocity in men at rest. *J. Cereb. Blood Flow Metab.* 1996; 16(6): 1255-1262.
272. Jordan J, Shannon JR, Diedrich A, Black B, Costa F, Robertson D *et al.* Interaction of carbon dioxide and sympathetic nervous system activity in the regulation of cerebral perfusion in humans. *Hypertension* 2000; 36(3): 383-388.
273. Ito H, Kanno I, Ibaraki M, Hatazawa J, Miura S. Changes in cerebral blood flow during and after 48 h of both isocapnic and poikilocapnic hypoxia in humans. *J. Cereb. Blood Flow Metab.* 2003; 23(6): 665-670.
274. Pandit JJ, Mohan RM, Paterson ND, Poulin MJ. Cerebral blood flow sensitivities to CO<sub>2</sub> measured with steady-state and modified rebreathing methods. *Respir. Physiol. Neuro.* 2007; 159(1): 34-44.
275. Ito H, Kanno I, Ibaraki M, Suhara T, Miura S. Relationship between baseline cerebral blood flow and vascular responses to changes in PaCO<sub>2</sub> measured by positron emission tomography in humans: implication of inter-individual variations of cerebral vascular tone. *Acta Physiol.* 2008; 193(4): 325-330.
276. Coverdale NS, Gati JS, Opalevych O, Perrotta A, Shoemaker JK. Cerebral blood flow velocity underestimates cerebral blood flow during modest hypercapnia and hypocapnia. *J. Appl. Physiol.* 2014; 117(10): 1090-1096.
277. Battisti-Charbonney A, Fisher J, Duffin J. The cerebrovascular response to carbon dioxide in humans. *J. Physiol.-London* 2011; 589(12): 3039-3048.
278. Chacon M, Severino M, Panerai R. Gray Box Model with an SVM to Represent the Influence of PaCO<sub>2</sub> on the Cerebral Blood Flow Autoregulation. In: Martin CS, Kim SW (eds). *Progress in Pattern Recognition, Image Analysis, Computer Vision, and Applications*, vol. 7042. Springer-Verlag Berlin: Berlin, 2011, pp 630-637.
279. Bednarczyk EM, Rutherford WF, Leisure GP, Munger MA, Panacek EA, Miraldi FD *et al.* Hyperventilation-induced reduction in cerebral blood flow: assessment by positron emission tomography. *DICP : the annals of pharmacotherapy* 1990; 24(5): 456-60.
280. Poulin MJ, Liang PJ, Robbins PA. Fast and slow components of cerebral blood flow response to step decreases in end-tidal PCO<sub>2</sub> in humans. *J. Appl. Physiol.* 1998; 85(2): 388-397.
281. Vovk A, Cunningham DA, Kowalchuk JM, Paterson DH, Duffin J. Cerebral blood flow responses to changes in oxygen and carbon dioxide in humans. *Can. J. Physiol. Pharmacol.* 2002; 80(8): 819-827.
282. Claassen J, Zhang R, Fu Q, Witkowski S, Levine BD. Transcranial Doppler estimation of cerebral blood flow and cerebrovascular conductance during modified rebreathing. *J. Appl. Physiol.* 2007; 102(3): 870-877.
283. Fushimi Y, Miki Y, Mori N, Okada T, Urayama S, Fukuyama H *et al.* Signal Changes in the Brain on Susceptibility-Weighted Imaging Under Reduced Cerebral Blood Flow: A Preliminary Study. *J. Neuroimaging* 2010; 20(3): 255-259.
284. Rostrup E, Larsson HB, Toft PB, Garde K, Thomsen C, Ring P *et al.* Functional MRI of CO<sub>2</sub> induced increase in cerebral perfusion. *NMR in biomedicine* 1994; 7(1-2): 29-34.
285. Bulte DP, Chiarelli PA, Wise RG, Jezzard P. Cerebral perfusion response to hyperoxia. *J. Cereb. Blood Flow Metab.* 2007; 27(1): 69-75.
286. Nishimura N, Iwasaki K, Ogawa Y, Shibata S. Oxygen administration, cerebral blood flow velocity, and dynamic cerebral autoregulation. *Aviat. Space Environ. Med.* 2007; 78(12): 1121-1127.
287. Wagner M, Jurcoane A, Volz S, Magerkurth J, Zanella FE, Neumann-Haefelin T *et al.* Age-Related Changes of Cerebral Autoregulation: New Insights with Quantitative T<sub>2</sub><sup>\*</sup>-Mapping and Pulsed Arterial Spin-Labeling MR Imaging. *Am. J. Neuroradiol.* 2012; 33(11): 2081-2087.
288. Wagner M, Magerkurth J, Volz S, Jurcoane A, Singer OC, Neumann-Haefelin T *et al.* T<sub>2</sub><sup>\*</sup>- and PASL-based perfusion mapping at 3 Tesla: influence of oxygen-ventilation on cerebral autoregulation. *Journal of magnetic resonance imaging : JMRI* 2012; 36(6): 1347-52.
289. Watson NA, Beards SC, Altaf N, Kassner A, Jackson A. The effect of hyperoxia on cerebral blood flow: a study in healthy volunteers using magnetic resonance phase-contrast angiography. *Eur. J. Anaesth.* 2000; 17(3): 152-159.
290. Kolbitsch C, Lorenz IH, Hormann C, Hinteregger M, Lockinger A, Moser PL *et al.* The influence of hyperoxia on regional cerebral blood flow (rCBF), regional cerebral blood volume (rCBV) and cerebral blood flow velocity in the middle cerebral artery (CBFV/MCA) in human volunteers. *Magn. Reson. Imaging* 2002; 20(7): 535-541.
291. Johnston AJ, Steiner LA, Balestreri M, Gupta AK, Menon DK. Hyperoxia and the cerebral hemodynamic responses to moderate hyperventilation. *Acta Anaesthesiol Scand* 2003; 47(4): 391-6.
292. Meadows GE, O'Driscoll DM, Simonds AK, Morrell MJ, Corfield DR. Cerebral blood flow response to isocapnic hypoxia during slow-wave sleep and wakefulness. *J. Appl. Physiol.* 2004; 97(4): 1343-1348.

293. Zaharchuk G, Martin AJ, Dillon WP. Noninvasive imaging of quantitative cerebral blood flow changes during 100% oxygen inhalation using arterial spin-labeling MR imaging. *Am. J. Neuroradiol.* 2008; 29(4): 663-667.
294. Thomas DJ, Marshall J, Rossrussell RW, Wetherleymein G, Duboulay GH, Pearson TC *et al.* Effect of hematocrit on cerebral blood-flow in man. *Lancet* 1977; 2(8045): 941-943.
295. Henriksen L, Paulson OB, Smith RJ. Cerebral blood flow following normovolemic hemodilution in patients with high hematocrit. *Ann Neurol* 1981; 9(5): 454-7.
296. Kusunoki M, Kimura K, Nakamura M, Isaka Y, Yoneda S, Abe H. Effects of hematocrit variations on cerebral blood-flow and oxygen-transport in ischemic cerebrovascular-disease. *J. Cereb. Blood Flow Metab.* 1981; 1(4): 413-417.
297. Grotta J, Ackerman R, Correia J, Fallick G, Chang J. Whole-blood viscosity parameters and cerebral blood-flow. *Stroke* 1982; 13(3): 296-301.
298. Macko RF, Ameriso SF, Akmal M, Paganinihill A, Mohler JG, Massry SG *et al.* Arterial oxygen-content and age are determinants of middle cerebral-artery blood-flow velocity. *Stroke* 1993; 24(7): 1025-1028.
299. García - Polo P, Hernández - Tamames JA, García - Álvarez R, Alfayate E, Zelaya F, Álvarez - Linera J *et al.* Effects of haematocrit level in Cerebral Blood Flow quantification with ASL in dementia. 2012.
300. Mathew RJ, Wilson WH, Tant SR. Determinants of resting regional cerebral blood flow in normal subjects. *Biol Psychiatry* 1986; 21(10): 907-14.
301. Harrigan MR, Satti JA, Deveikis JP, Thompson BG. Effect of hematocrit on calculation of cerebral blood flow and lambda in xenon CT. *The Keio journal of medicine* 2000; 49 Suppl 1: A36-7.
302. Brown MM, Marshall J. Regulation of cerebral blood-flow in response to changes in blood-viscosity. *Lancet* 1985; 1(8429): 604-609.
303. Santos-Galduroz RF, Bueno OFA, Yamaga LI, Armani F, Galduroz JCF. Influence of blood viscosity to cerebral blood flow in older humans compared to young subjects. *Clin. Neurophysiol.* 2012; 123(1): 117-120.
304. Ibaraki M, Shinohara Y, Nakamura K, Miura S, Kinoshita F, Kinoshita T. Interindividual variations of cerebral blood flow, oxygen delivery, and metabolism in relation to hemoglobin concentration measured by positron emission tomography in humans. *J. Cereb. Blood Flow Metab.* 2010; 30(7): 1296-1305.
305. Gottesman RF, Sojkova J, Beason-Held LL, An Y, Longo DL, Ferrucci L *et al.* Patterns of Regional Cerebral Blood Flow Associated With Low Hemoglobin in the Baltimore Longitudinal Study of Aging. *J. Gerontol. Ser. A-Biol. Sci. Med. Sci.* 2012; 67(9): 963-969.
306. Brown MM, Wade JP, Marshall J. Fundamental importance of arterial oxygen content in the regulation of cerebral blood flow in man. *Brain* 1985; 108 ( Pt 1): 81-93.
307. Arbelaez AM, Rutlin JR, Hershey T, Powers WJ, Videen TO, Cryer PE. Thalamic Activation During Slightly Subphysiological Glycemia in Humans. *Diabetes Care* 2012; 35(12): 2570-2574.
308. Arbelaez AM, Su Y, Thomas JB, Hauch AC, Hershey T, Ances BM. Comparison of Regional Cerebral Blood Flow Responses to Hypoglycemia Using Pulsed Arterial Spin Labeling and Positron Emission Tomography. *PLoS One* 2013; 8(3).
309. Eckert B, Ryding E, Agardh CD. Sustained elevation of cerebral blood flow after hypoglycaemia in normal man. *Diabetes Research and Clinical Practice* 1998; 40(2): 91-100.
310. Kerr D, Stanley JC, Barron M, Thomas R, Leatherdale BA, Pickard J. Symmetry of cerebral blood-flow and cognitive responses to hypoglycemia in humans. *Diabetologia* 1993; 36(1): 73-78.
311. Powers WJ, Hirsch IB, Cryer PE. Effect of stepped hypoglycemia on regional cerebral blood flow response to physiological brain activation. *Am. J. Physiol.-Heart Circul. Physiol.* 1996; 270(2): H554-H559.
312. Tallroth G, Ryding E, Agardh CD. Regional cerebral blood-flow in normal man during insulin-induced hypoglycemia and in the recovery period following glucose-infusion. *Metabolism-Clinical and Experimental* 1992; 41(7): 717-721.
313. Teh MM, Dunn JT, Choudhary P, Samarasinghe Y, Macdonald I, O'Doherty M *et al.* Evolution and resolution of human brain perfusion responses to the stress of induced hypoglycemia. *Neuroimage* 2010; 53(2): 584-592.
314. Thomas M, Sherwin RS, Murphy J, Kerr D. Importance of cerebral blood flow to the recognition of and physiological responses to hypoglycemia. *Diabetes* 1997; 46(5): 829-833.
315. Teves D, Videen TO, Cryer PE, Powers WJ. Activation of human medial prefrontal cortex during autonomic responses to hypoglycemia. *Proceedings of the National Academy of Sciences of the United States of America* 2004; 101(16): 6217-6221.

316. Rosengarten B, Osthaus S, Auch D, Kaps M. Effects of acute hyperhomocysteinemia on the neurovascular coupling mechanism in healthy young adults. *Stroke* 2003; 34(2): 446-51.
317. Sun Y, Lu CJ, Chen RC, Chien KL. Lack of Association Between Total Serum Homocysteine and Extracranial Cerebral Flow. *J. Formos. Med. Assoc.* 2010; 109(4): 278-286.
318. Claus JJ, Breteler MMB, Hasan D, Krenning EP, Bots ML, Grobbee DE *et al.* Regional cerebral blood flow and cerebrovascular risk factors in the elderly population. *Neurobiology of aging* 1998; 19(1): 57-64.
319. Farhoudi M, Mehrvar K, Aslanabadi N, Ghabili K, Baghmishe NR, Ilkhchoei F. Doppler study of cerebral arteries in hypercholesterolemia. *Vasc Health Risk Manag* 2011; 7: 203-7.
320. Rubba P, Faccenda F, Disomma S, Gnasso A, Scarpato N, Iannuzzi A *et al.* Cerebral blood-flow velocity and systemic vascular-resistance after acute reduction of low-density-lipoprotein in familial hypercholesterolemia. *Stroke* 1993; 24(8): 1154-1161.
321. Smit RAJ, Trompet S, Sabayan B, le Cessie S, van der Grond J, van Buchem MA *et al.* Higher Visit-to-Visit Low-Density Lipoprotein Cholesterol Variability Is Associated With Lower Cognitive Performance, Lower Cerebral Blood Flow, and Greater White Matter Hyperintensity Load in Older SubjectsClinical Perspective. *Circulation* 2016; 134(3): 212-221.
322. Hasselbalch SG, Knudsen GM, Jakobsen J, Hageman LP, Holm S, Paulson OB. Blood-brain-barrier permeability of glucose and ketone-bodies during short-term starvation in humans. *American Journal of Physiology-Endocrinology and Metabolism* 1995; 268(6): E1161-E1166.
323. Hasselbalch SG, Madsen PL, Hageman LP, Olsen KS, Justesen N, Holm S *et al.* Changes in cerebral blood flow and carbohydrate metabolism during acute hyperketonemia. *American Journal of Physiology-Endocrinology and Metabolism* 1996; 270(5): E746-E751.
324. Kielstein JT, Donnerstag F, Gasper S, Menne J, Kielstein A, Martens-Lobenhoffer J *et al.* ADMA increases arterial stiffness and decreases cerebral blood flow in humans. *Stroke* 2006; 37(8): 2024-2029.
325. Duarte J, Markus H, Harrison MJG. Changes in cerebral blood-flow as monitored by transcranial doppler during voluntary hyperventilation and their effect on the electroencephalogram. *J. Neuroimaging* 1995; 5(4): 209-211.
326. Ito H, Kanno I, Hatazawa J, Miura S. Changes in human cerebral blood flow and myocardial blood flow during mental stress measured by dual positron emission tomography. *Annals of Nuclear Medicine* 2003; 17(5): 381-386.
327. Wang JJ, Rao HY, Wetmore GS, Furlan PM, Korczykowski M, Dinges DF *et al.* Perfusion functional MRI reveals cerebral blood flow pattern under psychological stress. *Proceedings of the National Academy of Sciences of the United States of America* 2005; 102(49): 17804-17809.
328. Reiman EM, Fusselman MJ, Fox PT, Raichle ME. Neuroanatomical correlates of anticipatory anxiety. *Science (New York, N.Y.)* 1989; 243(4894 Pt 1): 1071-4.
329. Rodriguez G, Cogorno P, Gris A, Marengo S, Mesiti C, Nobili F *et al.* Regional cerebral blood-flow and anxiety - a correlation study in neurologically normal-patients. *J. Cereb. Blood Flow Metab.* 1989; 9(3): 410-416.
330. Naveteur J, Roy JC, Ovelac E, Steinling M. Anxiety, emotion and cerebral blood-flow. *Int. J. Psychophysiol.* 1992; 13(2): 137-146.
331. Tankard CF, Waldstein SR, Siegel EL, Holder LE, Lefkowitz D, Anstett F *et al.* Cerebral blood flow and anxiety in older men: An analysis of resting anterior asymmetry and prefrontal regions. *Brain Cogn.* 2003; 52(1): 70-78.
332. Hasler G, Fromm S, Alvarez RP, Luckenbaugh DA, Drevets WC, Grillon C. Cerebral blood flow in immediate and sustained anxiety. *J. Neurosci.* 2007; 27(23): 6313-6319.
333. Van den Bergh O, Zaman J, Bresseleers J, Verhamme P, Van Diest I. Anxiety, pCO(2) and cerebral blood flow. *Int. J. Psychophysiol.* 2013; 89(1): 72-77.
334. Zeidan F, Martucci KT, Kraft RA, McHaffie JG, Coghill RC. Neural correlates of mindfulness meditation-related anxiety relief. *Social cognitive and affective neuroscience* 2014; 9(6): 751-9.
335. Gur RC, Gur RE, Resnick SM, Skolnick BE, Alavi A, Reivich M. The effect of anxiety on cortical cerebral blood-flow and metabolism. *J. Cereb. Blood Flow Metab.* 1987; 7(2): 173-177.
336. Gur RC, Gur RE, Skolnick BE, Resnick SM, Silver FL, Chawluk J *et al.* Effects of task-difficulty on regional cerebral blood-flow - relationships with anxiety and performance. *Psychophysiology* 1988; 25(4): 392-399.
337. Lou HC, Kjaer TW, Friberg L, Wildschiodtz G, Holm S, Nowak M. A 15O-H2O PET study of meditation and the resting state of normal consciousness. *Hum Brain Mapp* 1999; 7(2): 98-105.
338. Khalsa DS, Amen D, Hanks C, Money N, Newberg A. Cerebral blood flow changes during chanting meditation. *Nuclear Medicine Communications* 2009; 30(12): 956-961.

339. Wang DJJ, Rao HY, Korczykowski M, Wintering N, Pluta J, Khalsa DS *et al.* Cerebral blood flow changes associated with different meditation practices and perceived depth of meditation. *Psychiatry Research-Neuroimaging* 2011; 191(1): 60-67.
340. Newberg AB, Wintering N, Waldman MR, Amen D, Khalsa DS, Alavi A. Cerebral blood flow differences between long-term meditators and non-meditators. *Conscious Cogn* 2010; 19(4): 899-905.
341. Newberg A, Alavi A, Baime M, Pourdehnad M, Santanna J, d'Aquid E. The measurement of regional cerebral blood flow during the complex cognitive task of meditation: a preliminary SPECT study. *Psychiatry Research-Neuroimaging* 2001; 106(2): 113-122.
342. Schneider F, Gur RC, Jaggi JL, Gur RE. Differential effects of mood on cortical cerebral blood-flow - a Xe-133 clearance study. *Psychiatry Res.* 1994; 52(2): 215-236.
343. George MS, Ketter TA, Parekh PI, Horwitz B, Herscovitch P, Post RM. Brain activity during transient sadness and happiness in healthy women. *The American journal of psychiatry* 1995; 152(3): 341-51.
344. George MS, Ketter TA, Parekh PI, Herscovitch P, Post RM. Gender differences in regional cerebral blood flow during transient self-induced sadness or happiness. *Biol. Psychiatry* 1996; 40(9): 859-871.
345. Aalto S, Naatanen P, Wallius E, Metsahonkala L, Stenman H, Niem PM *et al.* Neuroanatomical substrata of amusement and sadness: a PET activation study using film stimuli. *Neuroreport* 2002; 13(1): 67-73.
346. Marci CD, Glick DM, Loh R, Dougherty DD. Autonomic and prefrontal cortex responses to autobiographical recall of emotions. *Cognitive, affective & behavioral neuroscience* 2007; 7(3): 243-50.
347. Lane RD, Reiman EM, Bradley MM, Lang PJ, Ahern GL, Davidson RJ *et al.* Neuroanatomical correlates of pleasant and unpleasant emotion. *Neuropsychologia* 1997; 35(11): 1437-44.
348. Lane RD, Reiman EM, Axelrod B, Yun LS, Holmes A, Schwartz GE. Neural correlates of levels of emotional awareness. Evidence of an interaction between emotion and attention in the anterior cingulate cortex. *Journal of cognitive neuroscience* 1998; 10(4): 525-35.
349. Paradiso S, Robinson RG, Ponto LLB, Watkins GL, Hichwa RD. Regional cerebral blood flow changes during visually induced subjective sadness in healthy elderly persons. *J. Neuropsychiatr. Clin. Neurosci.* 2003; 15(1): 35-44.
350. Paradiso S, Robinson RG, Andreasen NC, Downhill JE, Davidson RJ, Kirchner PT *et al.* Emotional activation of limbic circuitry in elderly normal subjects in a PET study. *The American journal of psychiatry* 1997; 154(3): 384-9.
351. Hoehn-Saric R, Lee JS, McLeod DR, Wong DF. Effect of worry on regional cerebral blood flow in nonanxious subjects. *Psychiatry Res. Neuroimaging* 2005; 140(3): 259-269.
352. Andresescu C, Gross JJ, Lenze E, Edelman KD, Snyder S, Tanase C *et al.* Altered cerebral blood flow patterns associated with pathologic worry in the elderly. *Depress. Anxiety* 2011; 28(3): 202-209.
353. Takeuchi H, Taki Y, Hashizume H, Sassa Y, Nagase T, Nouchi R *et al.* Cerebral Blood Flow during Rest Associates with General Intelligence and Creativity. *PLoS One* 2011; 6(9).
354. Ravnkilde B, Videbech P, Clemmensen K, Egander A, Rasmussen NA, Gjedde A *et al.* The Danish PET/depression project: cognitive function and regional cerebral blood flow. *Acta Psychiatr. Scand.* 2003; 108(1): 32-40.
355. Rabbitt P, Scott M, Thacker N, Lowe C, Jackson A, Horan M *et al.* Losses in gross brain volume and cerebral blood flow account for age-related differences in speed but not in fluid intelligence. *Neuropsychology* 2006; 20(5): 549-557.
356. Poels MMF, Ikram MA, Vernooij MW, Krestin GP, Hofman A, Niessen WJ *et al.* Total cerebral blood flow in relation to cognitive function: The Rotterdam Scan Study. *J. Cereb. Blood Flow Metab.* 2008; 28(10): 1652-1655.
357. Steffener J, Brickman AM, Habeck CG, Salthouse TA, Stern Y. Cerebral Blood Flow and Gray Matter Volume Covariance Patterns of Cognition in Aging. *Hum. Brain Mapp.* 2013; 34(12): 3267-3279.
358. Beschoner P, Richter S, Lo H, Sim EJ, Baron K, Osterfeld N *et al.* Baseline brain perfusion and working memory capacity: a neuroimaging study. *Neuroreport* 2008; 19(18): 1803-7.
359. Ragland JD, Coleman AR, Gur RC, Glahn DC, Gur RE. Sex differences in brain-behavior relationships between verbal episodic memory and resting regional cerebral blood flow. *Neuropsychologia* 2000; 38(4): 451-461.
360. Mazoyer B, Houde O, Joliot M, Mellet E, Tzourio-Mazoyer N. Regional cerebral blood flow increases during wakeful rest following cognitive training. *Brain Research Bulletin* 2009; 80(3): 133-138.
361. Chapman SB, Aslan S, Spence JS, Hart JJ, Jr., Bartz EK, Didehbani N *et al.* Neural mechanisms of brain plasticity with complex cognitive training in healthy seniors. *Cereb Cortex* 2015; 25(2): 396-405.

362. Mozolic JL, Hayasaka S, Laurienti PJ. A cognitive training intervention increases resting cerebral blood flow in healthy older adults. *Frontiers in Human Neuroscience* 2010; 4.
363. Takeuchi H, Taki Y, Nouchi R, Hashizume H, Sekiguchi A, Kotozaki Y *et al.* Effects of working memory training on functional connectivity and cerebral blood flow during rest. *Cortex* 2013; 49(8): 2106-2125.
364. Chavez-Eakle RA, Graff-Guerrero A, Garcia-Reyna JC, Vaugier V, Cruz-Fuentes C. Cerebral blood flow associated with creative performance: A comparative study. *Neuroimage* 2007; 38(3): 519-528.
365. Johnson DL, Wiebe JS, Gold SM, Andreasen NC, Hichwa RD, Watkins GL *et al.* Cerebral blood flow and personality: A positron emission tomography study. *Am. J. Psychiat.* 1999; 156(2): 252-257.
366. Stenberg G, Wendt PE, Risberg J. Regional cerebral blood-flow and extroversion. *Pers. Individ. Differ.* 1993; 15(5): 547-554.
367. Ebmeier KP, Deary IJ, Ocarroll RE, Prentice N, Moffoot APR, Goodwin GM. Personality associations with the uptake of the cerebral blood-flow marker (99M)Tc-Exametazime estimated with single photon emission tomography. *Pers. Individ. Differ.* 1994; 17(5): 587-595.
368. O'Gorman RL, Kumari V, Williams SCR, Zelaya FO, Connor SEJ, Alsop DC *et al.* Personality factors correlate with regional cerebral perfusion. *Neuroimage* 2006; 31(2): 489-495.
369. Kano M, Coen SJ, Farmer AD, Aziz Q, Williams SCR, Alsop DC *et al.* Physiological and psychological individual differences influence resting brain function measured by ASL perfusion. *Brain Struct. Funct.* 2014; 219(5): 1673-1684.
370. Mathew RJ, Weinman ML, Barr DL. Personality and regional cerebral blood-flow. *Br. J. Psychiatry* 1984; 144(MAY): 529-532.
371. Sugiura M, Kawashima R, Nakagawa M, Okada K, Sato T, Goto R *et al.* Correlation between human personality and neural activity in cerebral cortex. *Neuroimage* 2000; 11(5 Pt 1): 541-6.
372. Kotajima F, Meadows GE, Morrell MJ, Corfield DR. Cerebral blood flow changes associated with fluctuations in alpha and theta rhythm during sleep onset in humans. *J. Physiol.-London* 2005; 568(1): 305-313.
373. Kuboyama T, Hori A, Sato T, Mikami T, Yamaki T, Ueda S. Changes in cerebral blood flow velocity in healthy young men during overnight sleep and while awake. *Electroencephalogr. Clin. Neurophysiol.* 1997; 102(2): 125-131.
374. Braun AR, Balkin TJ, Wesensten NJ, Carson RE, Varga M, Baldwin P *et al.* Regional cerebral blood flow throughout the sleep-wake cycle - An (H<sub>2</sub>O)-O-15 PET study. *Brain* 1997; 120: 1173-1197.
375. Droste DW, Berger W, Schuler E, Krauss JK. Middle cerebral-artery blood-flow velocity in healthy-persons during wakefulness and sleep - a transcranial doppler study. *Sleep* 1993; 16(7): 603-609.
376. Hajak G, Klingelhofer J, Schulzvarzegi M, Matzander G, Sander D, Conrad B *et al.* Relationship between cerebral blood-flow velocities and cerebral electrical-activity in sleep. *Sleep* 1994; 17(1): 11-19.
377. Hiroki M, Uema T, Kajimura N, Ogawa K, Nishikawa M, Kato M *et al.* Cerebral white matter blood flow is constant during human non-rapid eye movement sleep: a positron emission tomographic study. *J. Appl. Physiol.* 2005; 98(5): 1846-1854.
378. Hofle N, Paus T, Reutens D, Fiset P, Gotman J, Evans AC *et al.* Regional cerebral blood flow changes as a function of delta and spindle activity during slow wave sleep in humans. *J. Neurosci.* 1997; 17(12): 4800-4808.
379. Kajimura N, Uchiyama M, Takayama Y, Uchida S, Uema T, Kato M *et al.* Activity of midbrain reticular formation and neocortex during the progression of human non-rapid eye movement sleep. *J. Neurosci.* 1999; 19(22): 10065-10073.
380. Kjaer TW, Law I, Wiltschiotz G, Paulson OB, Madsen PL. Regional cerebral blood flow during light sleep - a (H<sub>2</sub>O)-O-15-PET study. *J. Sleep Res.* 2002; 11(3): 201-207.
381. Fischer AQ, Taormina MA, Akhtar B, Chaudhary BA. The effect of sleep on intracranial hemodynamics - a transcranial doppler study. *J. Child Neurol.* 1991; 6(2): 155-158.
382. Meyer JS, Ishikawa Y, Hata T, Karacan I. Cerebral blood-flow in normal and abnormal sleep and dreaming. *Brain Cogn.* 1987; 6(3): 266-294.
383. Klingelhofer J, Hajak G, Matzander G, Schulzvarzegi M, Sander D, Ruther E *et al.* Dynamics of cerebral blood-flow velocities during normal human sleep. *Clin. Neurol. Neurosurg.* 1995; 97(2): 142-148.
384. Madsen PL, Schmidt JF, Wildschiodtz G, Friberg L, Holm S, Vorstrup S *et al.* Cerebral O<sub>2</sub>-metabolism and cerebral blood-flow in humans during deep and rapid-eye-movement sleep. *J. Appl. Physiol.* 1991; 70(6): 2597-2601.
385. Townsend RE, Prinz PN, Obrist WD. Human cerebral blood-flow during sleep and waking. *J. Appl. Physiol.* 1973; 35(5): 620-625.



386. Madsen PL, Schmidt JF, Holm S, Vorstrup S, Lassen NA, Wildschiodtz G. Cerebral oxygen-metabolism and cerebral blood-flow in man during light sleep (stage-2). *Brain Res.* 1991; 557(1-2): 217-220.
387. Madsen PL, Holm S, Vorstrup S, Friberg L, Lassen NA, Wildschiodtz G. Human regional cerebral blood-flow during rapid-eye-movement sleep. *J. Cereb. Blood Flow Metab.* 1991; 11(3): 502-507.
388. Maquet P, Peters JM, Aerts J, Delfiore G, Degueldre C, Luxen A *et al.* Functional neuroanatomy of human rapid-eye-movement sleep and dreaming. *Nature* 1996; 383(6596): 163-166.
389. Balkin TJ, Braun AR, Wesensten NJ, Jeffries K, Varga M, Baldwin P *et al.* The process of awakening: a PET study of regional brain activity patterns mediating the re-establishment of alertness and consciousness. *Brain* 2002; 125: 2308-2319.
390. Poudel GR, Innes CR, Jones RD. Cerebral perfusion differences between drowsy and nondrowsy individuals after acute sleep restriction. *Sleep* 2012; 35(8): 1085-96.
391. Kawasaki T, Kiyosawa M, Ishii K, Senda M. Regional cerebral blood flow response to visual stimulation measured quantitatively with PET. *Neuro-Ophthalmol.* 1998; 20(2): 79-89.
392. Uludag K, Dubowitz DJ, Yoder EJ, Restom K, Liu TT, Buxton RB. Coupling of cerebral blood flow and oxygen consumption during physiological activation and deactivation measured with fMRI. *Neuroimage* 2004; 23(1): 148-155.
393. Ramsay SC, Murphy K, Shea SA, Friston KJ, Lammertsma AA, Clark JC *et al.* Changes in global cerebral blood-flow in humans - effect on regional cerebral blood-flow during a neural activation task. *J. Physiol.-London* 1993; 471: 521-534.
394. Wiedensohler R, Kuchta J, Aschoff A, Harders A, Klug N. Visually evoked changes of blood flow velocity and pulsatility index in the posterior cerebral arteries: A transcranial Doppler study. *Zent.bl. Neurochir.* 2004; 65(1): 13-17.
395. Lisak M, Trkanjec Z, Mikula I, Demarin V. Mean blood flow velocities in posterior cerebral arteries during visual stimulation. *Mt. Sinai J. Med.* 2005; 72(5): 346-350.
396. Roland PE, Friberg L. Localization of cortical areas activated by thinking. *Journal of neurophysiology* 1985; 53(5): 1219-43.
397. Silvestrini M, Cupini LM, Matteis M, Troisi E, Caltagirone C. Bilateral simultaneous assessment of cerebral flow velocity during mental activity. *Journal of cerebral blood flow and metabolism : official journal of the International Society of Cerebral Blood Flow and Metabolism* 1994; 14(4): 643-8.
398. Okuda J, Fujii T, Ohtake H, Tsukiura T, Tanji K, Suzuki K *et al.* Thinking of the future and past: the roles of the frontal pole and the medial temporal lobes. *Neuroimage* 2003; 19(4): 1369-80.
399. Deutsch G, Papanicolaou AC, Bourbon WT, Eisenberg HM. Cerebral blood flow evidence of right frontal activation in attention demanding tasks. *The International journal of neuroscience* 1987; 36(1-2): 23-8.
400. Schnittger C, Johannes S, Arnavaz A, Munte TF. Relation of cerebral blood flow velocity and level of vigilance in humans. *Neuroreport* 1997; 8(7): 1637-1639.
401. Shaw TH, Warm JS, Finomore V, Tripp L, Matthews G, Weiler E *et al.* Effects of sensory modality on cerebral blood flow velocity during vigilance. *Neurosci. Lett.* 2009; 461(3): 207-211.
402. Jann K, Koenig T, Dierks T, Boesch C, Federspiel A. Association of individual resting state EEG alpha frequency and cerebral blood flow. *Neuroimage* 2010; 51(1): 365-372.
403. Matthews G, Warm JS, Reinerman-Jones LE, Langheim LK, Washburn DA, Tripp L. Task Engagement, Cerebral Blood Flow Velocity, and Diagnostic Monitoring for Sustained Attention. *J. Exp. Psychol.-Appl.* 2010; 16(2): 187-203.
404. Bryan RM. Cerebral blood-flow and energy-metabolism during stress. *American Journal of Physiology* 1990; 259(2): H269-H280.
405. Vingerhoets G, Luppens E. Cerebral blood flow velocity changes during dichotic listening with directed or divided attention: a transcranial Doppler ultrasonography study. *Neuropsychologia* 2001; 39(10): 1105-1111.
406. Mathew RJ, Barr DL, Weinman ML. Caffeine and cerebral blood-flow. *Br. J. Psychiatry* 1983; 143(DEC): 604-608.
407. Cameron OG, Modell JG, Hariharan M. Caffeine and human cerebral blood-flow - a positron emission tomography study. *Life Sci.* 1990; 47(13): 1141-1146.
408. Lunt MJ, Ragab S, Birch AA, Schley D, Jenkinson DF. Comparison of caffeine-induced changes in cerebral blood flow and middle cerebral artery blood velocity shows that caffeine reduces middle cerebral artery diameter. *Physiol. Meas.* 2004; 25(2): 467-474.
409. Kennedy DO, Haskell CF. Cerebral blood flow and behavioural effects of caffeine in habitual and non-habitual consumers of caffeine: A near infrared spectroscopy study. *Biol. Psychol.* 2011; 86(3): 298-306.

410. Vidyasagar R, Greyling A, Draijer R, Corfield DR, Parkes LM. The effect of black tea and caffeine on regional cerebral blood flow measured with arterial spin labeling. *Journal of cerebral blood flow and metabolism : official journal of the International Society of Cerebral Blood Flow and Metabolism* 2013; 33(6): 963-8.
411. Jones HE, Herning RI, Cadet JL, Griffiths RR. Caffeine withdrawal increases cerebral blood flow velocity and alters quantitative electroencephalography (EEG) activity. *Psychopharmacology* 2000; 147(4): 371-377.
412. Watson JM, Lunt MJ, Morris S, Weiss MJ, Hussey D, Kerr D. Reversal of caffeine withdrawal by ingestion of a soft beverage. *Pharmacol. Biochem. Behav.* 2000; 66(1): 15-18.
413. Grichisch Y, Cavusoglu M, Preissl H, Uludag K, Hallschmid M, Birbaumer N *et al.* Differential effects of intranasal insulin and caffeine on cerebral blood flow. *Hum. Brain Mapp.* 2012; 33(2): 280-287.
414. Haase CG, Becka M, Kuhlmann J, Wensing G. Influences of caffeine, acetazolamide and cognitive stimulation on cerebral blood flow velocities. *Prog. Neuro-Psychopharmacol. Biol. Psychiatry* 2005; 29(4): 549-556.
415. Addicott MA, Yang LL, Peiffer AM, Burnett LR, Burdette JH, Chen MY *et al.* The Effect of Daily Caffeine Use on Cerebral Blood Flow: How Much Caffeine can we Tolerate? *Hum. Brain Mapp.* 2009; 30(10): 3102-3114.
416. Couturier EGM, Laman DM, vanDuijn MAJ, vanDuijn H. Influence of caffeine and caffeine withdrawal on headache and cerebral blood flow velocities. *Cephalalgia* 1997; 17(3): 188-190.
417. Sigmon SC, Herning RI, Better W, Cadet JL, Griffiths RR. Caffeine withdrawal, acute effects, tolerance, and absence of net beneficial effects of chronic administration: cerebral blood flow velocity, quantitative EEG, and subjective effects. *Psychopharmacology* 2009; 204(4): 573-585.
418. Field AS, Laurienti PJ, Yen YF, Burdette JH, Moody DM. Dietary caffeine consumption and withdrawal: Confounding variables in quantitative cerebral perfusion studies? *Radiology* 2003; 227(1): 129-135.
419. Debrah K, Haigh R, Sherwin R, Murphy J, Kerr D. Effect of acute and chronic caffeine use on the cerebrovascular, cardiovascular and hormonal responses to orthostasis in healthy-volunteers. *Clin. Sci.* 1995; 89(5): 475-480.
420. Sasaki H, Hirasawa A, Washio T, Ogoh S. Acute effect of coffee drinking on dynamic cerebral autoregulation. *European journal of applied physiology* 2016; 116(5): 879-84.
421. Grasser EK, Yepuri G, Dulloo AG, Montani JP. Cardio- and cerebrovascular responses to the energy drink Red Bull in young adults: a randomized cross-over study. *European Journal of Nutrition* 2014; 53(7): 1561-1571.
422. Grasser EK, Dulloo AG, Montani JP. Cardiovascular and Cerebrovascular Effects in Response to Red Bull Consumption Combined With Mental Stress. *American Journal of Cardiology* 2015; 115(2): 183-189.
423. Monnard CR, Montani J-P, Grasser EK. Cerebro- and Cardio-vascular Responses to Energy Drink in Young Adults: Is there a Gender Effect? *Frontiers in Physiology* 2016; 7(346).
424. Wennmalm A. Effect of cigarette-smoking on basal and carbon-dioxide stimulate cerebral blood-flow in man. *Clin. Physiol.* 1982; 2(6): 529-535.
425. Cruickshank JM, Neildwyer G, Dorrance DE, Hayes Y, Patel S. Acute effects of smoking on blood-pressure and cerebral blood-flow. *J. Hum. Hypertens.* 1989; 3(6): 443-449.
426. Morioka C, Kondo H, Akashi K, Matsumura K, Ochi N, Makinaga G *et al.* The continuous and simultaneous blood flow velocity measurement of four cerebral vessels and a peripheral vessel during cigarette smoking. *Psychopharmacology* 1997; 131(3): 220-229.
427. Yamamoto Y, Nishiyama Y, Monden T, Satoh K, Ohkawa M. A study of the acute effect of smoking on cerebral blood flow using Tc-99m-ECD SPET. *Eur. J. Nucl. Med. Mol. Imaging* 2003; 30(4): 612-614.
428. Kochanowicz J, Lewko J, Rutkowski R, Turek G, Sieskiewicz A, Lyson T *et al.* Influence of Smoking Cigarettes on Cerebral Blood Flow Parameters. *Biol. Res. Nurs.* 2015; 17(1): 8-12.
429. Shinohara T, Nagata K, Yokoyama E, Sato M, Matsuoka S, Kanno I *et al.* Acute effects of cigarette smoking on global cerebral blood flow in overnight abstinent tobacco smokers. *Nicotine Tob. Res.* 2006; 8(1): 113-121.
430. Domino EF, Minoshima S, Guthrie S, Ohl L, Ni LS, Koeppe RA *et al.* Nicotine effects on regional cerebral blood flow in awake, resting tobacco smokers. *Synapse* 2000; 38(3): 313-321.
431. Zubieta JK, Lombardi U, Minoshima S, Guthrie S, Ni LS, Ohl LE *et al.* Regional cerebral blood flow effects of nicotine in overnight abstinent smokers. *Biol. Psychiatry* 2001; 49(11): 906-913.
432. Domino EF, Ni LS, Xu YJ, Koeppe RA, Guthrie S, Zubieta JK. Regional cerebral blood flow and plasma nicotine after smoking tobacco cigarettes. *Prog. Neuro-Psychopharmacol. Biol. Psychiatry* 2004; 28(2): 319-327.

433. Zubieta JK, Heitzeg MM, Xu YJ, Koeppe RA, Ni LS, Guthrie S *et al.* Regional cerebral blood flow responses to smoking in tobacco smokers after overnight abstinence. *Am. J. Psychiat.* 2005; 162(3): 567-577.
434. Vafaei MS, Gjedde A, Imamirad N, Vang K, Chakravarty MM, Lerch JP *et al.* Smoking normalizes cerebral blood flow and oxygen consumption after 12-hour abstinence. *J. Cereb. Blood Flow Metab.* 2015; 35(4): 699-705.
435. Tanabe J, Crowley T, Hutchison K, Miller D, Johnson G, Du YP *et al.* Ventral striatal blood flow is altered by acute nicotine but not withdrawal from nicotine. *Neuropsychopharmacology* 2008; 33(3): 627-633.
436. Rogers RL, Meyer JS, Shaw TG, Mortel KF, Hardenberg JP, Zaid RR. Cigarette smoking decreases cerebral blood flow suggesting increased risk for stroke. *JAMA-J. Am. Med. Assoc.* 1983; 250(20): 2796-2800.
437. Yamashita K, Kobayashi S, Yamaguchi S, Kitani M, Tsunematsu T. Effect of smoking on regional cerebral blood-flow in the normal aged volunteers. *Gerontology* 1988; 34(4): 199-204.
438. Kubota K, Yamaguchi T, Fujiwara T, Matsuzawa T. Effects of smoking on regional cerebral blood-flow in cerebral vascular-disease patients and normal subjects. *Tohoku J. Exp. Med.* 1987; 151(3): 261-268.
439. Rogers RL, Meyer JS, Judd BW, Mortel KF. Abstinence from cigarette-smoking improves cerebral perfusion among elderly chronic smokers. *JAMA-J. Am. Med. Assoc.* 1985; 253(20): 2970-2974.
440. Yamashita K, Kobayashi S, Yamaguchi S. Cerebral blood flow and cessation of cigarette smoking in healthy volunteers. *Intern. Med.* 2000; 39(11): 891-893.
441. Siennicki-Lantz A, Reinprecht F, Wollmer P, Elmstahl S. Smoking-related changes in cerebral perfusion in a population of elderly men. *Neuroepidemiology* 2008; 30(2): 84-92.
442. Boms N, Yonai Y, Sandor M, Rosengarten B, Bornstein NM, Csiba L *et al.* Effect of Smoking Cessation on Visually Evoked Cerebral Blood Flow Response in Healthy Volunteers. *J. Vasc. Res.* 2010; 47(3): 214-220.
443. Addicott MA, Froeliger B, Kozink RV, Van Wert DM, Westman EC, Rose JE *et al.* Nicotine and Non-Nicotine Smoking Factors Differentially Modulate Craving, Withdrawal and Cerebral Blood Flow as Measured with Arterial Spin Labeling. *Neuropsychopharmacology* 2014.
444. Durazzo TC, Meyerhoff DJ, Murray DE. Comparison of Regional Brain Perfusion Levels in Chronically Smoking and Non-Smoking Adults. *Int. J. Environ. Res. Public Health* 2015; 12(7): 8198-8213.
445. Wang Z, Faith M, Patterson F, Tang K, Kerrin K, Wileyto EP *et al.* Neural substrates of abstinence-induced cigarette cravings in chronic smokers. *J. Neurosci.* 2007; 27(51): 14035-14040.
446. Wang Z, Ray R, Faith M, Tang K, Wileyto EP, Detre JA *et al.* Nicotine abstinence-induced cerebral blood flow changes by genotype. *Neurosci. Lett.* 2008; 438(3): 275-280.
447. Marxen M, Gan G, Schwarz D, Mennigen E, Pilhatsch M, Zimmermann US *et al.* Acute effects of alcohol on brain perfusion monitored with arterial spin labeling magnetic resonance imaging in young adults. *J. Cereb. Blood Flow Metab.* 2014; 34(3): 472-479.
448. Hine CH, Shick AF, Margolis L, Burbridge TN, Simon A. Effects of alcohol in small doses and tetraethylthiuramdisulphide (antabus) on the cerebral blood flow and cerebral metabolism. *The Journal of pharmacology and experimental therapeutics* 1952; 106(3): 253-60.
449. Newlin DB, Golden CJ, Quaife M, Graber B. Effect of alcohol ingestion on regional cerebral blood flow. *The International journal of neuroscience* 1982; 17(3): 145-50.
450. Mathew RJ, Wilson WH. Regional cerebral blood flow changes associated with ethanol intoxication. *Stroke* 1986; 17(6): 1156-9.
451. Volkow ND, Mullani N, Gould L, Adler SS, Guynn RW, Overall JE *et al.* Effects of acute alcohol-intoxication on cerebral blood-flow measured with PET. *Psychiatry Res.* 1988; 24(2): 201-209.
452. Sano M, Wendt PE, Wirsén A, Stenberg G, Risberg J, Ingvar DH. Acute effects of alcohol on regional cerebral blood flow in man. *Journal of studies on alcohol* 1993; 54(3): 369-76.
453. Schwartz JA, Speed NM, Gross MD, Lucey MR, Bazakis AM, Hariharan M *et al.* Acute effects of alcohol administration on regional cerebral blood flow: the role of acetate. *Alcoholism, clinical and experimental research* 1993; 17(6): 1119-23.
454. Tiihonen J, Kuikka J, Hakola P, Paanila J, Airaksinen J, Eronen M *et al.* Acute ethanol-induced changes in cerebral blood-flow. *Am. J. Psychiat.* 1994; 151(10): 1505-1508.
455. Błaha M, Aaslid R, Douville CM, Correra R, Newell DW. Cerebral blood flow and dynamic cerebral autoregulation during ethanol intoxication and hypercapnia. *J. Clin. Neurosci.* 2003; 10(2): 195-198.

456. Stendel R, Irnich B, al Hassan AA, Heidenreich J, Pietilae T. The influence of ethanol on blood flow velocity in major cerebral vessels. A prospective and controlled study. *Alcohol* 2006; 38(3): 139-146.
457. Rickenbacher E, Greve DN, Azma S, Pfeuffer J, Marinkovic K. Effects of alcohol intoxication and gender on cerebral perfusion: an arterial spin labeling study. *Alcohol* 2011; 45(8): 725-737.
458. Strang NM, Claus ED, Ramchandani VA, Graff-Guerrero A, Boileau I, Hendershot CS. Dose-dependent effects of intravenous alcohol administration on cerebral blood flow in young adults. *Psychopharmacology (Berl)* 2015; 232(4): 733-44.
459. Gundersen H, van Wageningen H, Gruner R. Alcohol-induced changes in cerebral blood flow and cerebral blood volume in social drinkers. *Alcohol and alcoholism (Oxford, Oxfordshire)* 2013; 48(2): 160-5.
460. Christie IC, Price J, Edwards L, Muldoon M, Meltzer CC, Jennings JR. Alcohol consumption and cerebral blood flow among older adults. *Alcohol* 2008; 42(4): 269-75.
461. Gdovinova Z. Blood flow velocity in the middle cerebral artery in heavy alcohol drinkers. *Alcohol Alcohol.* 2001; 36(4): 346-348.
462. Gdovinova Z. Cerebral blood flow velocity and erythrocyte deformability in heavy alcohol drinkers at the acute stage and two weeks after withdrawal. *Drug Alcohol Depend* 2006; 81(3): 207-13.
463. Hamdi E, Al-Suhaili A, Abou-Saleh MT, Amin Y, Prais V. Cerebral blood flow in alcohol withdrawal: relation to severity of dependence and cognitive impairment. *Acta Neuropsychiatr.* 2003; 15(2): 55-62.
464. Clark CP, Brown GG, Eyler LT, Drummond SP, Braun DR, Tapert SF. Decreased perfusion in young alcohol-dependent women as compared with age-matched controls. *The American journal of drug and alcohol abuse* 2007; 33(1): 13-9.
465. Murray DE, Durazzo TC, Mon A, Schmidt TP, Meyerhoff DJ. Brain perfusion in polysubstance users: Relationship to substance and tobacco use, cognition, and self-regulation. *Drug Alcohol Depend.* 2015; 150: 120-128.
466. Nicolas JM, Catafau AM, Estruch R, Lomena FJ, Salamero M, Herranz R *et al.* Regional cerebral blood flow-SPECT in chronic-alcoholism - relation to neuropsychological testing. *J. Nucl. Med.* 1993; 34(9): 1452-1459.
467. Khalili-Mahani N, van Osch MJ, Baerends E, Soeter RP, de Kam M, Zoethout RW *et al.* Pseudocontinuous arterial spin labeling reveals dissociable effects of morphine and alcohol on regional cerebral blood flow. *Journal of cerebral blood flow and metabolism : official journal of the International Society of Cerebral Blood Flow and Metabolism* 2011; 31(5): 1321-33.
468. Tolentino NJ, Wierenga CE, Hall S, Tapert SF, Paulus MP, Liu TT *et al.* Alcohol effects on cerebral blood flow in subjects with low and high responses to alcohol. *Alcoholism, clinical and experimental research* 2011; 35(6): 1034-40.
469. Jochum T, Reinhard M, Boettger MK, Piater M, Bar KJ. Impaired cerebral autoregulation during acute alcohol withdrawal. *Drug Alcohol Depend* 2010; 110(3): 240-6.
470. Berglund M, Risberg J. Regional cerebral blood-flow during alcohol withdrawal. *Arch. Gen. Psychiatry* 1981; 38(3): 351-355.
471. Caspari D, Trabert W, Heinz G, Lion N, Henkes H, Huber G. The pattern of regional cerebral blood flow during alcohol withdrawal--a single photon emission tomography study with 99mTc-HMPAO. *Acta Psychiatr Scand* 1993; 87(6): 414-7.
472. Catafau AM, Etcheberrigaray A, Perez de los Cobos J, Estorch M, Guardia J, Flotats A *et al.* Regional cerebral blood flow changes in chronic alcoholic patients induced by naltrexone challenge during detoxification. *Journal of nuclear medicine : official publication, Society of Nuclear Medicine* 1999; 40(1): 19-24.
473. Gazdzinski S, Durazzo T, Jahng GH, Ezekiel F, Banys P, Meyerhoff D. Effects of chronic alcohol dependence and chronic cigarette smoking on cerebral perfusion: a preliminary magnetic resonance study. *Alcoholism, clinical and experimental research* 2006; 30(6): 947-58.
474. Mon A, Durazzo TC, Gazdzinski S, Meyerhoff DJ. The impact of chronic cigarette smoking on recovery from cortical gray matter perfusion deficits in alcohol dependence: longitudinal arterial spin labeling MRI. *Alcoholism, clinical and experimental research* 2009; 33(8): 1314-21.
475. Umhau JC, Zhou WY, Thada S, Demar J, Hussein N, Bhattacharjee AK *et al.* Brain Docosahexaenoic Acid DHA Incorporation and Blood Flow Are Increased in Chronic Alcoholics: A Positron Emission Tomography Study Corrected for Cerebral Atrophy. *PLoS one* 2013; 8(10).
476. Denier N, Gerber H, Vogel M, Klarhofer M, Riecher-Rössler A, Wiesbeck GA *et al.* Reduction in Cerebral Perfusion after Heroin Administration: A Resting State Arterial Spin Labeling Study. *PLoS one* 2013; 8(9).
477. Denier N, Schmidt A, Gerber H, Schmid O, Riecher-Rössler A, Wiesbeck GA *et al.* Association of frontal gray matter volume and cerebral perfusion in heroin addiction: a multimodal neuroimaging study. *Frontiers in psychiatry* 2013; 4: 135.

478. Guyer S, Kosel M, Altrichter S, El-Koussy M, Haemmig R, Fisch HU *et al.* Pattern of regional cerebral blood-flow changes induced by acute heroin administration - a perfusion MRI study. *J. Neuroradiol.* 2007; 34(5): 322-329.
479. Khalili-Mahani N, van Osch MJP, Baerends E, Soeter RP, de Kam M, Zoethout RWM *et al.* Pseudocontinuous arterial spin labeling reveals dissociable effects of morphine and alcohol on regional cerebral blood flow. *J. Cereb. Blood Flow Metab.* 2011; 31(5): 1321-1333.
480. Kosel M, Noss RS, Haemmig R, Wielepp P, Bundeli P, Heidbreder R *et al.* Cerebral blood flow effects of acute intravenous heroin administration. *Eur. Neuropsychopharmacol.* 2008; 18(4): 278-285.
481. Schlaepfer TE, Strain EC, Greenberg BD, Preston KL, Lancaster E, Bigelow GE *et al.* Site of opioid action in the human brain: Mu and kappa agonists' subjective and cerebral blood flow effects. *Am. J. Psychiat.* 1998; 155(4): 470-473.
482. Pezawas L, Fischer G, Podreka I, Schindler S, Brucke T, Jagsch R *et al.* Opioid addiction changes cerebral blood flow symmetry. *Neuropsychobiology* 2002; 45(2): 67-73.
483. Krystal JH, Woods SW, Kosten TR, Rosen MI, Seibyl JP, Vandyck CC *et al.* Opiate dependence and withdrawal - preliminary assessment using single-photon emission computerized-tomography (SPECT). *Am. J. Drug Alcohol Abuse* 1995; 21(1): 47-63.
484. Botelho MF, Relvas JS, Abrantes M, Cunha MJ, Marques TR, Rovira E *et al.* Brain blood flow SPET imaging in heroin abusers. In: Ali SF, Fornai F (eds). *Cellular and Molecular Mechanisms of Drugs of Abuse and Neurotoxicity: Cocaine, Ghb, and Substituted Amphetamines*, vol. 1074. Blackwell Publishing: Oxford, 2006, pp 466-477.
485. Danos P, Kasper S, Grunwald F, Klemm E, Krappel C, Broich K *et al.* Pathological regional blood flow in opiate-dependent patients during withdrawal: A HMPAO-SPECT study. *Neuropsychobiology* 1998; 37(4): 194-199.
486. Gerra G, Calbani B, Zaimovic A, Sartori R, Ugolotti G, Ippolito L *et al.* Regional cerebral blood flow and comorbid diagnosis in abstinent opioid addicts. *Psychiatry Res. Neuroimaging* 1998; 83(2): 117-126.
487. Levin JM, Mendelson JH, Holman BL, Teoh SK, Garada B, Schwartz RB *et al.* Improved regional cerebral blood-flow in chronic cocaine polydrug users treated with buprenorphine. *J. Nucl. Med.* 1995; 36(7): 1211-1215.
488. Rose JS, Branchey M, BuydensBranchey L, Stapleton JM, Chasten K, Werrell A *et al.* Cerebral perfusion in early and late opiate withdrawal: A technetium-99m-HMPAO SPECT study. *Psychiatry Res. Neuroimaging* 1996; 67(1): 39-47.
489. Vandyck CH, Rosen MI, Thomas HM, McMahon TJ, Wallace EA, Oconnor PG *et al.* SPECT regional cerebral blood-flow alterations in naltrexone-precipitated withdrawal from buprenorphine. *Psychiatry Res. Neuroimaging* 1994; 55(4): 181-191.
490. Devous MD, Trivedi MH, Rush AJ. Regional cerebral blood flow response to oral amphetamine challenge in healthy volunteers. *J. Nucl. Med.* 2001; 42(4): 535-542.
491. Gouzoulis-Mayfrank E, Schreckenberger M, Sabri O, Arning C, Thelen B, Spitzer M *et al.* Neurometabolic effects of psilocybin, 3,4-methylenedioxyethylamphetamine (MDE) and d-methamphetamine in healthy volunteers - A double-blind, placebo-controlled PET study with F-18 FDG. *Neuropsychopharmacology* 1999; 20(6): 565-581.
492. Nordin LE, Li TQ, Brogren J, Johansson P, Sjogren N, Hannesdottir K *et al.* Cortical responses to amphetamine exposure studied by pCASL MRI and pharmacokinetic/pharmacodynamic dose modeling. *Neuroimage* 2013; 68: 75-82.
493. Rose SE, Janke AL, Strudwick MW, McMahon KL, Chalk JB, Snyder P *et al.* Assessment of dynamic susceptibility contrast cerebral blood flow response to amphetamine challenge: A human pharmacological magnetic resonance imaging study at 1.5 and 4 T. *Magn. Reson. Med.* 2006; 55(1): 9-15.
494. Kahn DA, Prohovnik I, Lucas LR, Sackeim HA. Dissociated effects of amphetamine on arousal and cortical blood-flow in humans. *Biol. Psychiatry* 1989; 25(6): 755-767.
495. Mathew RJ, Wilson WH. Dextroamphetamine-induced changes in regional cerebral blood-flow. *Psychopharmacology* 1985; 87(3): 298-302.
496. Ances BM, Vaida F, Cherner M, Yeh MJ, Liang CL, Gardner C *et al.* HIV and Chronic Methamphetamine Dependence Affect Cerebral Blood Flow. *J. Neuroimmune Pharm.* 2011; 6(3): 409-419.
497. Kao CH, Wang SJ, Yeh SH. Presentation of regional cerebral blood-flow in amphetamine abusers by Tc-99m-HMPAO brain SPECT. *Nucl. Med. Commun.* 1994; 15(2): 94-98.
498. Alhassoon OM, Dupont RM, Schweinsburg BC, Taylor MJ, Patterson TL, Grant I. Regional cerebral blood flow in cocaine- versus methamphetamine-dependent patients with a history of alcoholism. *Int. J. Neuropsychopharmacol.* 2001; 4(2): 105-112.
499. Chang L, Ernst T, Speck O, Patel H, DeSilva M, Leonido-Yee M *et al.* Perfusion MRI and computerized cognitive test abnormalities in abstinent methamphetamine users. *Psychiatry Res. Neuroimaging* 2002; 114(2): 65-79.

500. Chung YA, Peterson BS, Yoon SJ, Cho SN, Chai S, Jeong J *et al.* In vivo evidence for long-term CNS toxicity, associated with chronic binge use of methamphetamine. *Drug Alcohol Depend* 2010; 111(1-2): 155-60.
501. Hwang J, Lyoo IK, Kim SJ, Sung YH, Bae S, Cho SN *et al.* Decreased cerebral blood flow of the right anterior cingulate cortex in long-term and short-term abstinent methamphetamine users. *Drug Alcohol Depend.* 2006; 82(2): 177-181.
502. Johnson BA, Dawes MA, Roache JD, Wells LT, Ait-Daoud N, Mauldin JB *et al.* Acute intravenous low- and high-dose cocaine reduces quantitative global and regional cerebral blood flow in recently abstinent subjects with cocaine. *J. Cereb. Blood Flow Metab.* 2005; 25(7): 928-936.
503. Mathew RJ, Wilson WH, Lowe JV, Humphries D. Acute changes in cranial blood flow after cocaine hydrochloride. *Biol. Psychiatry* 1996; 40(7): 609-616.
504. Pearson GD, Jeffery PJ, Harris GJ, Ross CA, Fischman MW, Camargo EE. Correlation of acute cocaine-induced changes in local cerebral blood-flow with subjective effects. *Am. J. Psychiat.* 1993; 150(3): 495-497.
505. Wallace EA, Wisniewski G, Zubal G, vanDyck CH, Pfau SE, Smith EO *et al.* Acute cocaine effects and absolute cerebral blood flow. *Psychopharmacology* 1996; 128(1): 17-20.
506. Gollub RL, Breiter HC, Kantor H, Kennedy G, Gastfriend D, Mathew RT *et al.* Cocaine decreases cortical cerebral blood flow but does not obscure regional activation in functional magnetic resonance imaging in human subjects. *J. Cereb. Blood Flow Metab.* 1998; 18(7): 724-734.
507. Herring RI, King DE, Better WE, Cadet JL. Neurovascular deficits in cocaine abusers. *Neuropsychopharmacology* 1999; 21(1): 110-118.
508. Adinoff B, Devous MD, Best SE, Harris TS, Chandler P, Frock SD *et al.* Regional cerebral blood flow in female cocaine-addicted subjects following limbic activation. *Drug Alcohol Depend.* 2003; 71(3): 255-268.
509. Adinoff B, Braud J, Devous MD, Harris TS. Caudolateral orbitofrontal regional cerebral blood flow is decreased in abstinent cocaine-addicted subjects in two separate cohorts. *Addict. Biol.* 2012; 17(6): 1001-1012.
510. Copersino ML, Herring RI, Better W, Cadet JL, Gorelick DA. EEG and Cerebral Blood Flow Velocity Abnormalities in Chronic Cocaine Users. *Clin. EEG Neurosci.* 2009; 40(1): 39-42.
511. Herring RI, King DE, Better W, Cadet JL. Cocaine dependence. A clinical syndrome requiring neuroprotection. *Annals of the New York Academy of Sciences* 1997; 825: 323-7.
512. Holman BL, Carvalho PA, Mendelson J, Teoh SK, Nardin R, Hallgring E *et al.* Brain perfusion is abnormal in cocaine-dependent polydrug users - a study using technetium-99M-HMPAO and ASPECT. *J. Nucl. Med.* 1991; 32(6): 1206-1210.
513. Levin JM, Holman BL, Mendelson JH, Teoh SK, Garada B, Johnson KA *et al.* Gender differences in cerebral perfusion in cocaine abuse - technetium-99M-HMPAO SPECT study of drug-abusing women. *J. Nucl. Med.* 1994; 35(12): 1902-1909.
514. Tumeo SS, Nagel JS, English RJ, Moore M, Holman BL. Cerebral abnormalities in cocaine abusers: demonstration by SPECT perfusion brain scintigraphy. Work in progress. *Radiology* 1990; 176(3): 821-4.
515. Weber DA, Franceschi D, Ivanovic M, Atkins HL, Cabahug C, Wong CTC *et al.* SPECT and planar brain imaging in crack abuse - iodine-123-iodoamphetamine uptake and localization. *J. Nucl. Med.* 1993; 34(6): 899-907.
516. Volkow ND, Mullani N, Gould KL, Adler S, Krajewski K. Cerebral blood-flow in chronic cocaine users - a study with positron emission tomography. *Br. J. Psychiatry* 1988; 152: 641-648.
517. Adinoff B, Devous MD, Cooper DB, Best SE, Chandler P, Harris T *et al.* Resting regional cerebral blood flow and gambling task performance in cocaine-dependent subjects and healthy comparison subjects. *Am. J. Psychiat.* 2003; 160(10): 1892-1894.
518. Adinoff B, Williams MJ, Best SE, Harris TS, Chandler P, Devous MD, Sr. Sex differences in medial and lateral orbitofrontal cortex hypoperfusion in cocaine-dependent men and women. *Gender medicine* 2006; 3(3): 206-22.
519. Browndyke JN, Tucker KA, Woods SP, Beauvais J, Cohen RA, Gottschalk PCH *et al.* Examining the effect of cerebral perfusion abnormality magnitude on cognitive performance in recently abstinent chronic cocaine abusers. *J. Neuroimaging* 2004; 14(2): 162-169.
520. Gottschalk PC, Kosten TR. Cerebral perfusion defects in combined cocaine and alcohol dependence. *Drug Alcohol Depend.* 2002; 68(1): 95-104.
521. Herring RI, Better W, Nelson R, Gorelick D, Cadet JL. The regulation of cerebral blood flow during intravenous cocaine administration in cocaine abusers. In: Trembly B, Slikker W (eds). *Neuroprotective Agents: Fourth International Conference*, vol. 890. New York Acad Sciences: New York, 1999, pp 489-494.

522. Holman BL, Mendelson J, Garada B, Teoh SK, Hallgring E, Johnson KA *et al.* Regional cerebral blood-flow improves with treatment in chronic cocaine polydrug users. *J. Nucl. Med.* 1993; 34(5): 723-727.
523. Kosten TR, Cheeves C, Palumbo J, Seibyl JP, Price LH, Woods SW. Regional cerebral blood flow during acute and chronic abstinence from combined cocaine-alcohol abuse. *Drug Alcohol Depend.* 1998; 50(3): 187-195.
524. Massardo T, Quintana JC, Jaimovich R, Saez CG, Cabrerias MJ, Pereira-Flores K *et al.* Changes in Regional Cerebral Blood Flow Are Associated With Endothelial Dysfunction Markers in Cocaine-Dependent Patients Under Recent Abstinence. *Journal of addiction medicine* 2015.
525. Tucker KA, Browndyke JN, Gottschalk PC, Cofrancesco AT, Kosten TR. Gender-specific vulnerability for rCBF abnormalities among cocaine abusers. *Neuroreport* 2004; 15(5): 797-801.
526. Adinoff B, Harris TS, Gu H, Stein EA. Posterior hippocampal regional cerebral blood flow predicts abstinence: a replication study. *Addict Biol* 2016.
527. Strickland TL, Mena I, Villanuevameyer J, Miller BL, Cummings J, Mehringer CM *et al.* Cerebral perfusion and neuropsychological consequences of chronic cocaine use. *J. Neuropsychiatr. Clin. Neurosci.* 1993; 5(4): 419-427.
528. Ernst T, Chang L, Oropilla G, Gustavson A, Speck O. Cerebral perfusion abnormalities in abstinent cocaine abusers: a perfusion MRI and SPECT study. *Psychiatry Res. Neuroimaging* 2000; 99(2): 63-74.
529. Mathew RJ, Wilson WH. Acute changes in cerebral blood-flow after smoking marijuana. *Life Sci.* 1993; 52(8): 757-767.
530. Mathew RJ, Wilson WH, Chiu NY, Turkington TG, Degrado TR, Coleman RE. Regional cerebral blood flow and depersonalization after tetrahydrocannabinol administration. *Acta Psychiatr. Scand.* 1999; 100(1): 67-75.
531. Mathew RJ, Wilson WH, Coleman RE, Turkington TG, DeGrado TR. Marijuana intoxication and brain activation in marijuana smokers. *Life Sci* 1997; 60(23): 2075-89.
532. Mathew RJ, Wilson WH, Humphreys DF, Lowe JV, Wiethel KE. Regional cerebral blood-flow after marijuana smoking. *J. Cereb. Blood Flow Metab.* 1992; 12(5): 750-758.
533. Mathew RJ, Wilson WH, Turkington TG, Hawk TC, Coleman RE, DeGrado TR *et al.* Time course of tetrahydrocannabinol-induced changes in regional cerebral blood flow measured with positron emission tomography. *Psychiatry Res. Neuroimaging* 2002; 116(3): 173-185.
534. van Hell HH, Bossong MG, Jager G, Kristo G, van Osch MJP, Zelaya F *et al.* Evidence for involvement of the insula in the psychotropic effects of THC in humans: a double-blind, randomized pharmacological MRI study. *Int. J. Neuropsychopharmacol.* 2011; 14(10): 1377-1388.
535. Block RI, O'Leary DS, Hichwa RD, Augustinack JC, Ponto LL, Ghoneim MM *et al.* Cerebellar hypoactivity in frequent marijuana users. *Neuroreport* 2000; 11(4): 749-53.
536. Jacobus J, Goldenberg D, Wierenga CE, Tolentino NJ, Liu TT, Tapert SF. Altered cerebral blood flow and neurocognitive correlates in adolescent cannabis users. *Psychopharmacology* 2012; 222(4): 675-684.
537. Tunving K, Thulin SO, Risberg J, Warkentin S. Regional cerebral blood-flow in long-term heavy cannabis use. *Psychiatry Res.* 1986; 17(1): 15-21.
538. Herning RI, Better WE, Tate K, Cadet JL. Cerebrovascular perfusion in marijuana users during a month of monitored abstinence. *Neurology* 2005; 64(3): 488-493.
539. Mathew RJ, Tant S, Burger C. Regional cerebral blood-flow in marijuana smokers. *British Journal of Addiction* 1986; 81(4): 567-571.
540. Lundqvist T, Jonsson S, Warkentin S. Frontal lobe dysfunction in long-term cannabis users. *Neurotoxicology and teratology* 2001; 23(5): 437-43.
541. Mathew RJ, Wilson WH, Tant SR. Regional cerebral blood-flow changes associated with amyl nitrate inhalation. *British Journal of Addiction* 1989; 84(3): 293-299.
542. Maximilian VA, Risberg J, Prohovnik I, Rehnstrom S, Haeger-Aronsen B. Regional cerebral blood flow and verbal memory after chronic exposure to organic solvents. *Brain and cognition* 1982; 1(2): 196-205.
543. Risberg J, Hagstadius S. Effects on the regional cerebral blood-flow of long-term exposure to organic-solvents. *Acta Psychiatr. Scand.* 1983; 67: 92-99.
544. Deschamps D, Garnier R, Lille F, Dinh YT, Bertaux L, Reygagne A *et al.* Evoked-potentials and cerebral blood-flow in solvent induced psycho-organic syndrome. *British Journal of Industrial Medicine* 1993; 50(4): 325-330.

545. Fincher CE, Chang TS, Harrell EH, Kettelhut MC, Rea WJ, Johnson A *et al.* Comparison of single photon emission computed tomography findings in cases of healthy adults and solvent-exposed adults. *Am. J. Ind. Med.* 1997; 31(1): 4-14.
546. Okada SI, Yamanouchi N, Kodama K, Uchida Y, Hirai S, Sakamoto T *et al.* Regional cerebral blood flow abnormalities in chronic solvent abusers. *Psychiatry Clin. Neurosci.* 1999; 53(3): 351-356.
547. Chang L, Grob CS, Ernst T, Itti L, Mishkin FS, Jose-Melchor R *et al.* Effect of ecstasy 3,4-methylenedioxymethamphetamine (MDMA) on cerebral blood flow: a co-registered SPECT and MRI study. *Psychiatry Res. Neuroimaging* 2000; 98(1): 15-28.
548. Carhart-Harris RL, Murphy K, Leech R, Erritzoe D, Wall MB, Ferguson B *et al.* The Effects of Acutely Administered 3,4-Methylenedioxymethamphetamine on Spontaneous Brain Function in Healthy Volunteers Measured with Arterial Spin Labeling and Blood Oxygen Level-Dependent Resting State Functional Connectivity. *Biol Psychiatry* 2014; 78(8): 554-562.
549. Sokoloff L, Perlin S, Kornetsky C, Kety SS. The effects of D-lysergic acid diethylamide on cerebral circulation and overall metabolism. *Annals of the New York Academy of Sciences* 1957; 66(3): 468-77.
550. Carhart-Harris RL, Muthukumaraswamy S, Roseman L, Kaelen M, Droog W, Murphy K *et al.* Neural correlates of the LSD experience revealed by multimodal neuroimaging. *Proc Natl Acad Sci U S A* 2016; 113(17): 4853-8.
551. Carhart-Harris RL, Erritzoe D, Williams T, Stone JM, Reed LJ, Colasanti A *et al.* Neural correlates of the psychedelic state as determined by fMRI studies with psilocybin. *Proc. Natl. Acad. Sci. U. S. A.* 2012; 109(6): 2138-2143.
552. Daglish MRC, Weinstein A, Malizia AL, Wilson S, Melichar JK, Britten S *et al.* Changes in regional cerebral blood flow elicited by craving memories in abstinent opiate-dependent subjects. *Am. J. Psychiat.* 2001; 158(10): 1680-1686.
553. Wilson W, Mathew R, Turkington T, Hawk T, Coleman RE, Provenzale J. Brain morphological changes and early marijuana use: a magnetic resonance and positron emission tomography study. *Journal of addictive diseases* 2000; 19(1): 1-22.
